# Supplementary material
Source: publisher figshare collection journal article supplement (https://gsajournals.figshare.com/ndownloader/files/17930561)
Supplement: Supplementary file 1 [file 17930561]

## Sheet: S9
Table S9 RNA-seq results for PI+ and PI- lines selected for behavioral responses to BUT and CYC, as well as unselected control lines. For each gene, its FlyBase ID and the total number of raw reads for each gene is shown.
		BUT												CYC												Control
		PI+						PI-						PI+						PI-
		1		2		3		1		2		3		1		2		3		1		2		3		1		2		3
Gene Symbol	FlyBase ID	A	B	A	B	A	B	A	B	A	B	A	B	A	B	A	B	A	B	A	B	A	B	A	B	A	B	A	B	A	B
7SLRNA:CR32864	FBgn0000003	0	0	0	0	0	0	0	0	0	0	0	0	0	0	0	0	0	0	0	0	0	0	0	0	0	0	0	0	0	0
a	FBgn0000008	1289	1210	1115	1175	1410	1402	1556	1361	1130	1482	1654	1604	915	1655	937	1396	1150	1490	972	1726	2027	1882	1198	1672	994	1156	793	1487	1256	932
abd-A	FBgn0000014	0	1	2	0	0	0	0	0	1	0	0	2	0	1	1	1	1	0	1	1	0	0	0	1	1	2	0	2	0	0
Abd-B	FBgn0000015	2	0	1	0	0	0	1	0	0	1	2	3	3	5	1	1	0	1	0	0	3	1	1	3	0	0	0	0	2	0
Abl	FBgn0000017	4090	3880	3698	3697	4216	4676	5236	5216	3961	5375	5110	4864	2772	5719	3356	4760	4137	5569	2855	5715	5425	5696	4598	6318	3969	4176	3350	5491	4905	3855
abo	FBgn0000018	250	210	231	244	291	245	265	217	209	341	340	310	278	379	252	281	280	288	218	343	381	361	259	338	259	302	176	362	305	215
ac	FBgn0000022	0	0	0	0	0	0	0	0	0	0	0	0	0	0	0	0	0	0	0	0	0	0	0	0	0	0	0	0	0	0
Ace	FBgn0000024	7228	6858	6723	6506	8743	8752	10261	10104	7012	9511	8964	8850	4738	11452	7262	10122	7495	10050	6267	11564	10764	11902	8406	11178	8198	8392	6174	9146	8901	8303
acj6	FBgn0000028	297	282	321	319	403	417	419	472	291	461	434	457	192	494	297	471	385	490	279	527	481	525	398	557	374	327	291	509	422	342
Acph-1	FBgn0000032	449	358	394	434	447	497	479	422	373	561	562	582	407	630	405	488	412	526	422	565	553	538	440	603	441	491	291	592	540	385
nAChRalpha1	FBgn0000036	1419	1384	1291	1222	1546	1857	1674	2107	1321	1962	1733	1670	705	2239	1303	1977	1213	1827	949	2129	1783	2191	1819	2512	1494	1366	1364	1645	1785	1766
mAChR-A	FBgn0000037	1797	1608	1455	1586	1951	1968	2066	2237	1562	2370	2226	1994	986	2476	1564	2074	1603	2086	1333	2605	2291	2437	1897	2621	1533	1552	1329	2031	1909	1544
nAChRbeta1	FBgn0000038	4660	4364	4540	4889	5682	5938	6232	7012	4741	6783	6296	6229	3022	8966	4484	7321	4708	7510	4252	8510	6565	7806	5730	8378	4628	4680	3915	6008	6174	5428
nAChRalpha2	FBgn0000039	1008	1118	983	1082	1241	1180	1298	1413	962	1472	1429	1374	1043	1777	1017	1545	1251	1657	767	1785	1398	1677	1083	1796	1005	1026	793	1411	1336	1114
Act5C	FBgn0000042	25805	27737	28113	30600	34754	29809	34645	32371	29548	43665	47807	42461	24740	48234	26191	36969	30060	42347	26520	43391	42328	38711	31328	43937	25189	26428	24422	40016	36132	29372
Act42A	FBgn0000043	1017	1030	1070	1162	1189	1070	1332	1056	852	1442	1426	1355	1228	1632	1228	1163	1108	1323	1205	1496	1386	1380	882	1433	1045	1181	768	1175	1142	1103
Act57B	FBgn0000044	32559	33696	32094	31487	39153	33502	40239	34909	34416	44087	39885	38155	24577	48082	34403	40916	23816	56879	25034	54638	49585	47194	25142	46464	32259	35890	23112	46075	45709	27001
Act79B	FBgn0000045	889	1242	762	984	898	852	1122	1183	1213	1871	941	985	576	1900	885	1870	448	2353	683	2411	1199	1749	527	1435	627	867	837	1441	1633	1637
Act87E	FBgn0000046	3533	3305	3812	3706	4520	3866	4188	3541	3759	4849	4951	4886	2896	5486	3719	4547	3380	7693	2709	5664	5005	5028	3430	5606	3566	3938	2568	5124	4669	3116
Act88F	FBgn0000047	187	258	137	165	151	221	254	255	230	259	231	188	123	287	127	290	128	379	88	330	181	354	143	240	105	186	93	283	293	221
ade2	FBgn0000052	3354	3252	3710	3563	3565	3172	3241	2021	3148	4595	3972	3730	3993	4913	3506	2545	3091	2683	2867	2618	4564	3233	2721	2773	2569	3325	2394	2843	2770	2289
ade3	FBgn0000053	4967	5076	3871	3873	4491	4381	4113	2932	3965	4297	6364	4678	5008	5011	3260	3037	3998	3993	2684	3247	5893	4242	3682	3810	4628	5240	3712	4560	4317	3321
Adf1	FBgn0000054	1094	1135	1070	1195	1401	1236	1359	1313	973	1554	1724	1494	1198	1750	1054	1415	1385	1738	1026	1793	1512	1565	1214	1737	1174	1169	875	1829	1470	968
Adh	FBgn0000055	284	302	186	190	257	229	242	214	279	394	273	261	142	305	202	253	210	318	189	246	333	368	175	278	189	185	169	185	122	124
Adhr	FBgn0000056	0	0	0	0	0	0	0	0	0	0	0	0	0	0	0	0	0	0	0	0	0	0	0	0	0	0	0	0	0	0
adp	FBgn0000057	1151	1069	1028	1082	1106	1041	1230	853	1066	1338	1391	1419	897	1377	842	997	940	1089	1006	1264	1468	1290	1067	1169	928	1023	714	1222	1124	824
al	FBgn0000061	21	30	29	17	33	26	40	23	30	41	41	41	19	42	17	33	21	46	18	62	41	41	26	56	36	35	14	41	35	16
Mps1	FBgn0000063	37	37	42	29	36	34	44	33	46	46	63	68	40	64	39	53	40	71	31	63	56	63	41	61	42	53	16	44	46	30
Ald	FBgn0000064	49411	49993	43013	45683	53611	48202	57443	46380	45886	60393	61348	58174	39890	68727	38212	56394	41014	67688	36501	63432	57200	60013	43680	64772	46258	51139	37948	64188	59334	47363
Ama	FBgn0000071	7	3	6	2	4	4	3	4	2	13	3	8	12	17	15	12	23	31	12	14	9	22	7	16	20	20	7	17	11	12
amd	FBgn0000075	376	456	419	534	514	458	450	527	395	585	538	511	463	718	370	724	511	885	277	667	520	591	364	783	427	519	312	770	471	420
amx	FBgn0000077	326	375	340	334	447	356	460	329	306	426	461	397	377	545	321	415	358	488	317	498	509	548	365	431	286	382	281	486	360	285
Amy-d	FBgn0000078	797	853	368	460	419	780	605	324	411	401	1807	569	86	46	610	436	415	465	843	735	829	225	1309	161	315	383	1046	552	523	321
Amy-p	FBgn0000079	600	869	472	736	369	1155	928	585	382	176	3548	885	78	48	284	338	185	482	1074	1249	673	105	3327	121	793	1065	2138	1141	942	693
AnxB9	FBgn0000083	7736	8590	8215	8947	9538	8683	10082	8287	7891	10548	11407	11049	9492	12177	8186	10319	9112	12244	7698	12144	12110	11429	8198	11187	8021	9087	5901	11821	9820	7797
AnxB10	FBgn0000084	3925	4295	3939	4529	4772	4426	4845	4370	3702	5306	5590	5135	4593	5938	3800	4922	4536	6038	3328	6086	5447	5473	4174	5610	3766	4184	2757	6115	5224	3547
CG2650	FBgn0000092	67	96	72	60	48	79	227	211	181	329	240	301	118	154	77	200	100	196	72	244	112	224	101	205	81	116	140	203	106	72
Anp	FBgn0000094	0	0	0	0	0	0	0	0	0	0	0	0	1	0	0	1	0	0	0	0	0	0	0	0	0	0	0	0	0	0
aop	FBgn0000097	1554	1608	1470	1516	1811	1801	1798	1743	1616	1964	2120	1900	1081	2006	1535	1923	1588	2298	1322	1972	2219	2050	1857	2285	1602	1714	1207	2182	1961	1571
RpLP0	FBgn0000100	38948	38084	42876	43686	44102	41167	43094	32231	39482	47740	56161	51755	47785	45229	34827	43842	41106	53569	31941	47420	55271	50618	44625	47500	42215	50992	29525	61034	44630	31026
Appl	FBgn0000108	22346	21330	20619	19946	26485	26433	29895	30425	21159	30491	29340	27836	13770	34393	21171	30147	22304	29277	18939	35105	32324	35485	27106	36579	23785	24157	17905	29655	29377	25742
Aprt	FBgn0000109	447	460	417	502	424	372	451	330	341	419	502	563	378	468	338	385	281	430	361	434	506	417	332	351	339	354	206	356	393	301
aret	FBgn0000114	2065	2141	1946	2110	2256	2309	2440	2080	2055	2686	2963	2690	1782	3033	2138	2446	2012	2758	1859	2587	2838	2763	2262	2900	2385	2625	1481	2692	2385	2199
Arl1	FBgn0000115	683	686	610	745	757	654	780	617	661	916	956	841	631	1042	577	748	605	887	578	823	899	880	676	928	560	705	553	836	727	590
Argk	FBgn0000116	66841	76577	62082	70779	74244	69041	88409	79424	57837	87825	78648	81658	50397	111263	46626	93613	51861	98640	41793	103237	79013	100646	56975	96639	51637	58920	52795	94989	73614	61998
arm	FBgn0000117	10336	10120	9524	9887	11335	10533	12656	11434	9712	13370	13125	12821	9540	15611	9478	12852	10775	14359	8514	14650	14318	14544	10579	14954	9514	10724	7541	14126	11881	9191
arr	FBgn0000119	1302	1343	1236	1293	1506	1565	1657	1472	1327	1609	1897	1666	1163	1908	1223	1576	1525	1921	1122	1726	1815	1764	1459	1909	1278	1439	994	1931	1548	1372
Arr1	FBgn0000120	206388	213063	205286	221764	249134	236074	250992	219484	206958	277722	311671	291737	218963	277139	198214	246514	267672	291784	174425	276106	291147	273550	260696	321024	206949	237852	157003	371282	262031	192711
Arr2	FBgn0000121	358906	329896	353956	348562	399231	358395	431232	365492	332319	441174	467093	436375	398377	484563	337468	420150	409964	469159	293415	462541	509273	449396	409799	493641	321997	349985	242005	534962	392570	283815
ase	FBgn0000137	2	0	0	0	0	1	0	0	0	0	2	1	1	0	0	1	1	0	0	0	0	0	3	1	1	1	0	1	0	0
ash2	FBgn0000139	705	698	965	1000	1031	942	975	759	611	953	1333	1156	1393	1227	1045	1053	1108	1230	807	1174	1199	1278	897	1163	856	1034	507	1199	973	589
asp	FBgn0000140	14	6	6	11	16	18	17	18	19	19	112	11	11	21	8	13	17	12	7	9	6	14	16	34	10	17	13	9	73	18
aub	FBgn0000146	11	9	11	16	11	18	14	9	11	18	22	18	4	13	8	13	16	11	14	18	14	17	10	24	11	18	3	6	26	15
aurA	FBgn0000147	18	23	23	31	35	42	24	26	37	41	61	41	23	42	26	22	44	38	25	42	50	36	29	42	25	50	22	50	43	29
awd	FBgn0000150	14435	15324	15139	16457	16041	14445	16444	11110	14799	18340	19327	19062	13838	17979	10388	15233	11501	18071	10689	16588	18707	18041	14256	16853	11736	14100	11678	17665	15419	9716
Axs	FBgn0000152	255	236	203	269	232	239	252	245	209	290	300	283	216	354	169	331	208	431	174	379	273	355	202	313	215	258	153	385	250	202
b	FBgn0000153	3718	3337	2865	2690	3410	3128	4221	2993	3620	4008	4277	4035	3593	5587	3150	4175	3727	5581	2981	4858	5539	4712	3679	4413	2978	2934	2170	4912	3515	2279
Dll	FBgn0000157	916	890	849	973	1080	1001	1156	1066	901	1191	1222	1221	778	1427	894	1188	1124	1598	845	1432	1304	1349	1016	1497	931	1011	583	1467	1188	996
bam	FBgn0000158	0	0	1	0	1	0	2	0	0	0	4	0	1	1	0	0	0	1	1	2	0	0	1	1	1	1	0	1	6	2
baz	FBgn0000163	2287	2666	2506	2499	2782	2800	3571	3341	2542	3148	3130	2982	2504	3624	2864	3613	2932	4130	2308	3508	3886	3754	3128	4273	3023	3440	2397	4606	3286	2847
bcd	FBgn0000166	1	1	4	3	1	2	1	1	11	0	14	3	0	0	0	1	2	1	0	3	2	2	2	3	2	2	1	2	10	1
ben	FBgn0000173	4937	5107	4811	5103	5677	5357	6159	5425	4652	6466	6658	6611	4667	7412	5069	6413	5110	7346	5166	7643	7248	7561	5865	7751	5683	5899	4022	7635	6478	5359
bi	FBgn0000179	777	741	668	663	871	860	989	962	788	1014	983	957	497	1146	709	1058	781	1045	600	1061	1099	1188	877	1232	800	909	636	1145	937	768
bib	FBgn0000180	225	280	222	204	228	269	239	230	211	278	335	318	248	370	222	317	235	364	178	357	344	354	239	340	247	272	187	351	265	229
bic	FBgn0000181	11737	11491	12298	12511	13173	12001	12914	10321	12207	15072	15565	15584	14076	15701	11578	15064	12417	18011	11133	16591	18374	17623	13971	17232	12284	14822	8381	18433	13479	9989
BicC	FBgn0000182	0	0	0	0	0	0	0	0	0	0	0	0	0	0	0	0	0	0	0	0	0	0	0	0	0	0	0	0	0	0
BicD	FBgn0000183	3102	3027	2835	2995	3416	3300	4127	3752	2928	4079	4144	3840	1975	4593	2833	3803	3140	4253	2669	4464	4359	4514	3433	4555	3077	3207	2305	4101	3721	3434
boss	FBgn0000206	6047	5848	5318	5497	6506	5874	7073	7255	5906	8566	7540	7731	4720	10755	5212	8614	5182	8682	4435	8767	8011	9342	6321	9854	5896	6628	3748	8729	6721	6041
brm	FBgn0000212	2430	2443	2080	2437	2598	2543	2882	2577	2162	3333	3097	3120	1636	3512	1924	2883	2367	3295	1786	3457	3111	3445	2471	3319	2187	2435	1709	3216	2696	2141
Brd	FBgn0000216	0	0	0	0	0	0	0	0	0	0	0	0	0	0	0	0	0	0	0	0	0	0	0	0	0	0	0	0	0	0
brn	FBgn0000221	133	137	131	132	121	116	152	123	133	141	164	150	218	210	143	161	125	131	104	178	225	185	147	186	140	144	95	171	177	91
Bsg25A	FBgn0000227	0	1	0	0	1	0	0	0	0	0	0	0	0	0	0	0	0	0	0	0	1	0	0	0	0	0	0	0	0	1
Bsg25D	FBgn0000228	1657	1713	1562	1714	1898	2009	2158	1953	1557	2160	2422	2270	1414	2499	1556	2164	1986	2685	1376	2561	2393	2612	1952	2599	1836	1928	1299	2592	2382	1771
bsk	FBgn0000229	2848	2952	2724	2869	3423	3013	3504	3277	2711	3732	3995	3685	2573	4519	3037	3886	3247	4077	2860	4043	4175	4091	3120	4273	3171	3187	2203	4114	3572	3273
btd	FBgn0000233	37	46	29	36	45	38	46	45	41	52	56	48	31	58	33	58	44	83	30	76	36	49	34	53	31	32	35	63	61	35
bur	FBgn0000239	3455	3414	3195	3269	3416	3319	3860	2838	3472	3895	3921	3667	2571	3510	3265	3292	3115	3859	2981	3388	5250	4181	3639	4043	3432	3685	2096	4139	3506	2950
bw	FBgn0000241	1281	1060	1283	1137	1250	1217	1601	956	996	1231	1421	1601	980	1688	1033	1377	806	1294	912	1576	1836	1523	1285	1613	987	1104	706	1304	809	767
by	FBgn0000244	3192	3414	3327	3694	4186	3860	4098	3424	3060	3976	4752	3934	3234	4839	3228	4177	4015	5439	2904	4683	4768	4630	3567	4760	3541	4023	2720	5740	4312	3173
c(3)G	FBgn0000246	126	126	133	131	144	145	252	236	120	236	186	197	142	294	169	247	151	228	166	259	240	271	162	243	145	190	101	221	181	198
ca	FBgn0000247	2216	2111	2000	2091	2431	2422	2687	2601	2089	2765	2884	2583	1717	3051	1925	2710	2284	3009	1636	2965	3050	3230	2327	3051	2012	2314	1677	3034	2653	1917
cact	FBgn0000250	4175	4230	4211	4858	4852	4619	4788	4441	4040	5015	5409	5150	4468	6533	4257	5296	5278	6942	3874	6218	6682	6027	4717	6341	4267	4956	3043	6651	5229	4204
cad	FBgn0000251	4	3	0	2	3	1	0	4	5	1	45	0	0	3	0	2	5	1	2	1	3	5	1	4	3	0	2	3	11	0
Cam	FBgn0000253	73567	80721	72562	81650	97310	93722	90052	89605	72104	105857	110707	105696	60210	122793	78417	110532	89951	126251	72271	125010	107074	120677	90982	134320	87216	90430	53206	122782	105178	97301
capu	FBgn0000256	1827	1884	1745	2038	1967	2071	2662	2606	1883	2740	2949	2833	1781	2994	1690	2267	2014	2666	1772	2910	2562	2650	1997	2525	2018	2183	1498	2718	2313	1813
car	FBgn0000257	789	796	789	803	906	820	992	860	796	998	1029	1024	855	1186	764	1011	899	1080	628	1115	1199	1110	863	1145	767	904	558	1174	924	673
CkIIbeta	FBgn0000259	3336	3260	3112	3358	3913	3635	4296	3829	3280	4392	4561	4294	2608	4998	3679	4485	3512	4785	3698	5034	4968	4588	3806	4984	3562	3553	2311	4584	3908	3663
Cat	FBgn0000261	11719	12050	11274	13238	13188	12767	12372	8900	11677	15481	16925	14973	10240	14923	10220	12421	12376	15658	8523	12665	15419	13129	11319	14040	10826	13674	8553	17357	16017	10567
Pka-C1	FBgn0000273	8472	9007	7839	8730	10095	9972	11576	10731	8365	12204	11399	11660	6055	14045	8308	11604	9212	13163	8166	13907	12776	13633	10239	14471	9265	9538	7051	11839	10436	10266
Pka-C2	FBgn0000274	0	0	0	0	4	1	0	0	1	1	0	1	1	1	4	0	0	0	0	1	1	0	0	0	0	0	1	0	1	0
CecA1	FBgn0000276	3	6	36	323	103	4	37	3	18	47	11	9	297	132	390	48	393	232	54	264	50	89	7	146	292	134	59	6	126	262
CecA2	FBgn0000277	4	10	58	399	50	0	38	9	18	47	13	8	184	96	239	38	386	268	98	352	75	113	10	214	187	83	24	5	46	90
CecB	FBgn0000278	3	2	6	15	8	1	6	0	2	1	2	0	12	9	26	9	62	14	10	8	5	19	1	6	24	12	2	3	9	13
CecC	FBgn0000279	0	3	15	82	28	5	32	1	4	18	11	13	101	52	144	26	151	68	36	26	42	63	3	53	94	38	12	5	18	104
Cec-Psi1	FBgn0000280	0	0	1	1	0	0	0	0	0	0	0	0	0	0	0	0	0	0	0	0	0	0	0	0	1	0	1	0	0	0
Cec2	FBgn0000281	0	1	0	2	1	0	0	0	3	1	0	0	0	1	2	1	3	2	1	2	1	1	0	2	3	0	0	0	2	1
Cp190	FBgn0000283	2511	2440	2259	2433	2696	2621	3022	2630	2192	3120	3267	3038	1617	3228	2160	2758	2382	3003	1988	3190	3396	3406	2673	3326	2239	2473	1719	3296	2784	2238
Cf2	FBgn0000286	1953	1832	1785	1816	2130	2143	2231	2071	1732	2366	2643	2286	1460	2544	1800	2178	1885	2572	1815	2582	2680	2634	1945	2465	2164	2280	1496	2634	2352	1865
salr	FBgn0000287	659	691	597	654	834	800	851	827	605	864	841	747	651	997	645	847	775	912	532	775	1081	947	815	1046	712	702	522	1062	871	647
cg	FBgn0000289	4504	4581	4313	4583	5184	5189	5720	5653	4316	6122	6483	5946	3732	6856	4375	5674	5236	6665	3840	6453	6516	6600	5168	6988	4603	5061	3733	6772	5808	4486
Cg25C	FBgn0000299	13507	13584	11905	13782	13977	14249	14917	12330	11744	16041	15729	15265	6844	18618	7568	12845	7162	14167	7822	16726	15312	17479	11181	16297	9469	12727	9225	13720	13297	11258
ChAT	FBgn0000303	2328	2328	2322	2490	2893	2847	3218	3389	2400	3541	3362	3349	1720	3907	2060	3194	2720	3508	1797	3910	3216	4065	2875	4453	2485	2614	1992	3179	3388	2691
chif	FBgn0000307	1895	1959	1771	1900	2202	2219	2345	2440	1814	2548	2650	2515	1225	2799	1761	2419	1973	2701	1507	2650	2780	2762	2240	2904	1931	2035	1488	2765	2381	2112
chic	FBgn0000308	8065	8262	7989	8457	10074	8414	10320	8089	8088	10214	11412	10987	7584	11943	9230	10363	8169	11787	9267	12044	13020	11671	8709	11488	9314	9866	6212	12366	10748	9042
cin	FBgn0000316	1162	1271	1170	1214	1323	1216	1428	1204	1148	1575	1558	1455	1115	1665	1124	1437	1224	1693	1077	1411	1672	1695	1229	1635	1244	1300	844	1604	1402	1145
ck	FBgn0000317	1973	2123	1810	1792	2262	2217	2378	1994	1809	2799	2657	2505	1304	2899	1691	2290	1929	2508	1579	2444	2684	2689	1967	2646	1967	2206	1346	2473	2080	1953
cl	FBgn0000318	1742	1793	1866	1969	2062	2049	2198	1688	1615	2344	2239	2275	2075	2585	1566	2101	1713	2573	1577	2370	2238	2176	1742	2314	1627	1875	1302	2431	2150	1612
Chc	FBgn0000319	14795	14590	14098	14100	16463	15880	17734	16160	13638	18767	19430	17458	11024	20435	13092	16850	14025	18468	11460	18597	20273	19206	15161	19819	13913	15617	10582	18791	16501	14357
eya	FBgn0000320	1542	1725	1421	1634	1817	1829	2083	1853	1492	2016	2157	2204	1641	2670	1423	2294	1876	2613	1143	2255	2197	2361	1696	2603	1545	1746	1301	2679	2006	1632
clt	FBgn0000326	800	812	726	828	863	757	833	681	760	1056	1001	1057	780	1164	731	933	779	1031	720	1010	1079	973	788	976	729	842	533	974	875	729
cm	FBgn0000330	806	789	791	800	841	835	966	818	746	1061	1068	1045	927	1169	659	946	859	1077	653	1042	1145	1111	793	1082	760	888	572	1128	958	657
cn	FBgn0000337	1	1	2	1	1	2	2	3	0	1	0	4	1	1	1	2	1	4	1	1	1	1	0	0	3	0	0	0	4	0
cni	FBgn0000339	927	990	1048	1046	1242	1065	1109	884	870	1286	1299	1254	1128	1538	1048	1235	1059	1445	965	1175	1483	1309	998	1280	1122	1114	785	1494	1212	984
comt	FBgn0000346	9108	9453	8266	8953	11246	10659	11495	11578	8489	12598	11779	11319	6575	13905	8311	11987	8915	11048	7229	12952	12033	13703	10178	14830	8857	9049	6875	11594	11581	9561
cort	FBgn0000351	19	14	13	14	12	21	17	11	19	27	25	14	32	34	15	21	18	18	15	25	29	19	13	21	11	17	12	15	30	9
cos	FBgn0000352	1023	1082	916	909	1203	1114	1159	1143	886	1315	1309	1263	756	1563	1015	1324	1012	1265	781	1292	1271	1372	1016	1391	1212	1280	763	1283	1259	972
Cp15	FBgn0000355	18	4	184	1	11	0	0	17	55	12	21	0	0	0	6	2	2	2	1	1	7	0	0	50	4	4	10	3	24	8
Cp16	FBgn0000356	2	1	5	0	10	0	0	0	1	1	6	0	0	0	1	0	0	1	1	0	1	1	1	3	1	0	0	0	3	0
Cp18	FBgn0000357	7	9	56	8	9	4	7	9	5	15	21	10	5	13	6	5	5	4	7	17	19	15	10	9	7	6	3	10	10	5
Cp19	FBgn0000358	38	18	18	5	17	18	18	8	31	18	29	22	12	31	18	30	10	20	11	31	19	24	4	14	13	26	3	7	39	15
Cp36	FBgn0000359	216	1	10	15	10	9	3	1	70	2	12	6	7	14	4	1	8	1	2	0	3	6	0	7	9	7	5	16	77	7
Cp38	FBgn0000360	361	2	12	5	6	4	1	7	64	0	19	3	1	8	1	0	4	2	0	2	3	2	0	12	8	6	11	7	99	6
crc	FBgn0000370	30960	32659	30526	30977	36279	31250	36976	30607	31134	38265	43454	40289	33139	48632	30340	37219	33571	46705	29123	40514	45694	40890	35653	43770	33332	34650	21831	44413	35227	30433
crm	FBgn0000376	670	668	609	682	727	723	822	759	616	888	968	813	619	1028	650	867	778	998	512	962	894	991	722	1015	618	743	414	986	740	509
crn	FBgn0000377	989	943	886	998	985	948	1151	958	841	1171	1216	1145	861	1350	829	1048	928	1199	751	1143	1326	1288	906	1196	864	1063	599	1311	1091	828
csw	FBgn0000382	8884	8928	8950	9543	10760	10816	11400	11114	8783	12014	12455	11586	7592	13291	9200	11884	10418	13484	7829	12856	13156	13049	10606	14123	9641	10101	7515	14197	11140	9330
cta	FBgn0000384	542	550	550	563	627	594	619	615	528	738	728	695	560	774	641	739	722	786	656	788	806	728	655	794	686	590	430	824	665	623
cup	FBgn0000392	0	0	0	0	0	0	0	0	0	0	0	0	0	0	0	0	0	0	0	0	0	0	0	0	0	0	0	0	0	0
cv	FBgn0000394	832	919	804	925	1081	894	1043	886	803	1137	1124	1094	990	1353	820	1079	982	1424	825	1288	1300	1202	914	1236	944	1001	671	1332	1056	821
cv-2	FBgn0000395	765	817	705	751	814	855	964	865	788	1027	1168	939	674	1201	741	951	906	1225	630	972	1102	1056	773	1197	734	928	529	1171	927	737
CycA	FBgn0000404	80	52	42	59	66	48	65	80	109	46	249	58	50	87	45	64	81	65	56	77	82	72	63	91	57	77	47	59	220	60
CycB	FBgn0000405	56	13	14	17	49	17	12	31	135	15	581	19	11	23	21	29	58	10	18	18	12	22	9	26	17	26	16	20	375	14
Cyt-b5-r	FBgn0000406	29665	25096	24149	23136	25043	22059	21413	14142	24890	25700	30277	24609	21335	22414	18351	19161	19531	23927	15562	19447	31197	23933	24500	22334	22161	28020	17090	30614	26367	15894
Cyt-c-p	FBgn0000409	9067	9526	8821	8933	9280	7617	12571	10864	8938	12926	10556	11493	8149	15793	7910	13553	7177	14743	8363	15069	11769	13517	8152	13742	7541	8159	6468	9755	8932	8715
D	FBgn0000411	384	410	327	415	437	456	504	457	395	505	521	557	335	661	367	562	424	623	335	592	551	632	430	663	376	400	280	534	525	370
D1	FBgn0000412	2344	2367	2040	2284	2541	2321	2829	2391	2101	2932	2695	2889	1732	3165	2042	2617	2127	2887	1956	3270	3368	3283	2395	3271	2023	2402	1560	3139	2686	2147
Dab	FBgn0000414	4590	4452	4770	4446	5499	5808	6367	6040	4497	6663	6039	5807	3582	7221	4587	6047	4779	6647	3786	6619	6819	6968	5684	7461	4734	5141	3896	7286	5967	4688
Sap-r	FBgn0000416	34463	32593	33257	33881	39228	36396	37954	30548	33103	39546	47243	40271	29263	42360	30368	34038	33940	41134	27684	38330	46940	40383	35208	42735	34344	38149	23172	48418	41465	30762
Ddc	FBgn0000422	4517	4838	4029	4650	5178	5433	5216	5621	3754	5325	5825	5437	3669	6793	3732	5647	4629	6567	3600	6275	5133	5413	4858	6587	4115	4225	3580	6519	5677	4194
SmF	FBgn0000426	157	146	160	142	158	145	158	111	119	186	184	160	176	172	128	159	135	186	137	174	222	172	147	181	144	146	110	175	116	102
2016-12-01	FBgn0000427	58	4	1	1	2	3	0	5	60	0	7	5	1	4	9	11	16	1	16	0	2	3	2	6	5	8	2	4	35	1
Dfd	FBgn0000439	853	973	914	1060	1078	1173	1005	1052	1003	1214	1182	1082	859	1300	904	1298	1175	1649	729	1400	1389	1339	958	1420	1069	1105	624	1538	1201	932
Pkg21D	FBgn0000442	36	24	32	33	40	36	58	35	32	23	42	37	39	43	32	43	25	41	14	39	51	45	30	34	32	37	34	28	34	22
Dhod	FBgn0000447	661	765	898	958	941	813	921	730	928	1174	1157	1158	927	1019	826	866	842	1086	768	1070	1128	1071	922	1183	840	1039	707	1272	875	694
Hr46	FBgn0000448	312	322	293	316	394	412	413	463	307	459	477	407	192	553	374	471	313	477	375	619	497	516	422	537	452	368	312	450	446	471
dib	FBgn0000449	5	0	0	0	1	1	0	0	0	1	0	0	0	0	0	0	0	0	1	0	1	0	0	1	1	0	0	0	2	0
ect	FBgn0000451	51	54	29	56	38	48	71	74	25	40	47	67	43	102	22	95	50	106	27	103	54	123	58	107	63	58	27	79	53	33
Dip-B	FBgn0000454	3443	3403	3138	3271	3397	3285	3424	2750	3033	4194	4210	4120	2627	3917	2738	3581	2975	4352	2701	4247	4675	4183	2994	4238	3094	3553	2244	4016	3451	2825
Dip-C	FBgn0000455	1121	1160	1030	1119	946	866	1059	835	1031	1307	1449	1381	1162	1444	893	1076	729	909	914	1352	1501	1486	1093	1353	803	1087	857	1455	1212	860
disco	FBgn0000459	986	752	819	817	965	849	991	766	1020	1176	1412	935	703	1173	846	873	819	969	823	1085	1212	958	1107	1092	843	784	541	1242	963	565
Dl	FBgn0000463	335	360	313	366	402	377	437	353	334	478	512	461	230	588	312	493	401	555	265	490	455	515	328	568	426	449	270	574	431	399
Lar	FBgn0000464	294	348	334	329	401	410	420	439	312	435	390	394	220	475	338	473	307	443	298	456	449	435	406	538	370	344	300	420	435	400
Cyp6a2	FBgn0000473	1359	1308	4613	5291	8748	8000	2494	1455	3408	4010	3986	3273	2040	1789	3726	5779	1468	1881	2480	3293	1843	1166	3520	4040	2469	2300	2021	4581	1887	1151
DNaseII	FBgn0000477	3764	3012	2555	2348	2223	1983	2449	992	3196	3175	2733	2218	1765	1612	2135	1084	1819	1761	2250	1464	3344	1276	2529	1842	4639	4231	2557	4636	2696	1739
dnc	FBgn0000479	4952	5170	4704	4772	5021	5522	6274	6433	4647	6480	6611	6262	3420	7455	5016	6918	4984	7551	4296	8067	7286	8272	6240	8691	5583	5627	4153	6302	6716	6180
dor	FBgn0000482	701	673	646	696	820	723	920	777	742	914	997	901	690	1090	613	911	733	893	591	959	1065	1051	761	1013	660	731	484	1006	884	613
Pka-C3	FBgn0000489	2351	2674	2432	2609	2861	2850	3051	3135	2412	3229	3426	3031	2294	4091	2555	3650	3200	4333	2349	3922	3396	3909	2922	4354	2873	2971	1939	4083	3299	3007
dpp	FBgn0000490	800	927	887	1000	1139	1055	1096	998	751	1324	1221	1430	818	1443	860	1137	1024	1535	805	1339	1193	1405	940	1373	977	1266	665	1558	1058	883
Dr	FBgn0000492	374	204	189	256	321	235	543	224	377	347	356	672	269	405	270	267	249	326	440	340	475	377	295	344	296	430	171	338	283	237
ds	FBgn0000497	685	798	588	568	735	772	784	718	672	883	774	824	364	1023	468	925	497	1009	341	789	880	1075	600	1023	634	786	427	786	627	721
dsh	FBgn0000499	999	1031	968	1059	1165	1146	1334	1204	934	1366	1536	1380	1009	1576	934	1270	1138	1385	913	1481	1500	1481	1096	1604	983	1159	869	1537	1309	916
Dsk	FBgn0000500	1217	1294	1148	1112	1517	1215	1562	1069	1049	1281	1459	1438	1253	1658	1103	1439	1276	1591	1119	1457	1755	1394	1385	1638	951	952	898	1793	1475	1140
dsx	FBgn0000504	1202	1090	1231	1191	1460	1321	1376	1246	1372	1537	1443	1303	765	1443	1262	1419	1108	1403	1125	1492	1873	1650	1253	1586	1154	1715	952	1387	1251	1168
dwg	FBgn0000520	344	280	315	377	378	338	444	376	306	449	468	455	436	501	333	447	374	497	294	539	505	501	354	519	332	353	247	493	439	245
dx	FBgn0000524	554	492	517	557	571	540	694	480	495	642	755	654	407	694	425	574	532	711	477	629	728	665	554	686	480	522	402	718	585	447
e	FBgn0000527	6071	6297	4802	5075	5548	5226	7819	5794	5548	7077	7071	7623	4403	8603	4598	7383	5374	8913	4431	8608	7344	8336	6206	9575	5057	5730	4271	8256	5904	5292
bsh	FBgn0000529	195	189	106	155	139	164	240	250	165	227	230	214	151	310	168	210	181	233	138	273	219	246	221	289	149	127	141	202	195	136
ea	FBgn0000533	1445	1876	673	759	788	796	1362	1127	584	781	1040	1018	745	896	561	844	710	1032	946	1733	1535	1244	734	987	650	735	509	1056	1035	783
eag	FBgn0000535	2918	2128	2512	2276	2607	3030	4242	4043	2419	2969	3055	3214	1913	4453	2745	3295	2458	3533	2437	4018	4363	4346	3559	4068	2848	2643	2112	3083	2715	2638
eas	FBgn0000536	7398	7385	6928	6838	7309	6867	7179	5595	7056	7389	8226	7231	4915	7704	6234	6060	6271	7780	6282	6541	10298	7892	7728	7425	7005	7304	4857	7950	7618	6305
E(bx)	FBgn0000541	4569	4764	4442	4295	5549	5646	5783	5912	4565	6019	6264	5570	3080	6554	4539	6039	4893	6487	3627	6200	6499	6264	5336	6963	5207	5113	3808	6420	5796	5403
ec	FBgn0000542	327	358	352	348	389	397	425	372	308	459	440	435	238	573	289	510	318	598	257	569	441	520	296	513	300	362	252	486	396	329
ecd	FBgn0000543	826	749	751	814	938	787	999	954	730	1083	1165	1051	944	1251	785	1017	847	1164	669	1254	1052	1206	825	1166	800	882	534	1066	990	710
EcR	FBgn0000546	2161	2067	1936	1899	2503	2405	2649	2634	2012	2742	2785	2565	1471	3164	1972	2673	2202	2812	1850	3147	2957	3121	2423	3074	2259	2294	1800	2732	2498	2310
ed	FBgn0000547	3197	3524	3102	3273	3583	3625	4095	4080	3565	4802	4231	3976	2397	4887	3211	4508	3501	5522	2573	4851	4726	5294	3803	5611	3289	3843	2628	4677	4204	3895
Edg78E	FBgn0000551	4	10	6	10	7	5	13	11	8	13	11	14	9	22	8	15	10	14	7	20	17	25	16	19	6	17	8	12	18	11
Edg84A	FBgn0000552	4	1	1	1	2	0	0	3	2	2	1	1	2	3	2	0	1	3	0	3	3	1	1	3	1	2	1	3	3	0
Ef1alpha48D	FBgn0000556	237127	230687	219618	230174	236001	223174	225620	172991	215579	248784	328067	301565	205966	246993	201503	253535	222207	307208	175877	258556	300826	270349	237483	261182	218954	263310	132387	320815	238481	166631
Ef1alpha100E	FBgn0000557	22125	22067	19885	20994	24158	22608	27781	24636	23803	32157	31060	30170	18838	35447	21549	30155	21241	31005	17308	32074	28866	31664	24214	35049	21640	25161	15346	33448	26495	21909
EF2	FBgn0000559	119446	120945	121408	124604	127838	120054	132386	104439	122239	149993	168727	154721	118643	142669	98514	130846	118708	165387	93031	139872	166926	153420	134459	151951	117891	139710	79637	183116	129674	102127
eg	FBgn0000560	23	29	32	18	42	29	29	22	17	40	30	33	28	56	24	26	28	44	19	25	47	46	31	27	28	34	18	37	37	21
egl	FBgn0000562	3081	3080	3214	2973	3614	3445	3839	3298	3111	4040	4249	3935	2855	4388	3250	3770	3682	4559	2797	4579	4834	4543	3582	4507	3384	3674	2405	4806	3651	2797
Eh	FBgn0000564	4	4	7	4	11	7	2	4	2	4	4	3	12	6	9	14	11	4	2	8	11	6	10	8	14	26	1	6	6	7
Eip71CD	FBgn0000565	4024	3180	3366	3086	8233	3412	5205	3998	2712	3586	5437	4117	3692	13915	2156	3386	2999	2228	4232	4647	5557	2318	4038	6208	2189	1443	4402	4358	4251	1874
Eip55E	FBgn0000566	1453	1791	1469	1735	1872	1597	1824	1271	1646	2167	1855	1940	1137	1852	1119	1428	1238	1693	1210	1748	2274	2126	1514	1843	1375	1617	1103	1747	1428	1184
Eip74EF	FBgn0000567	1151	960	981	887	1150	1104	1493	1296	992	1342	1219	1231	631	1497	1057	1255	946	1351	928	1478	1511	1533	1169	1595	1041	1186	872	1276	1131	1059
Eip75B	FBgn0000568	5005	4366	4682	4338	5430	5570	6453	6027	5021	5719	5804	5576	3693	6681	5098	5847	4745	6107	4419	6979	7462	6838	5855	7225	5194	5175	3853	6414	5572	4731
emc	FBgn0000575	3972	4142	3662	3838	4526	4399	5033	4862	4131	4933	5543	5575	3549	6300	4622	5767	4866	6657	4217	6124	5987	5928	4871	6606	4589	4650	3265	6368	5279	4892
ems	FBgn0000576	131	130	113	137	172	149	178	133	122	207	184	146	108	223	134	205	144	219	86	201	166	210	124	221	124	135	99	252	162	108
en	FBgn0000577	108	103	86	122	115	110	153	126	98	127	137	139	76	157	93	134	133	168	75	170	130	126	107	156	98	96	79	155	136	101
ena	FBgn0000578	1201	1203	1260	1336	1505	1512	1780	1493	1216	1876	1557	1728	798	1810	1233	1592	1267	1846	1171	1888	1899	2093	1346	1926	1279	1410	976	1734	1527	1415
Eno	FBgn0000579	36858	38087	30687	34847	40277	36346	44008	37697	32709	43673	47875	43456	28741	47453	26288	39997	29094	45888	25150	46616	40785	44822	33448	49004	29869	32690	25035	43098	39071	31042
E(Pc)	FBgn0000581	3503	3728	3702	3395	4057	4539	4292	4488	3581	4700	4757	4116	2617	4633	3385	4403	3719	5085	2490	4223	5225	4859	4191	5441	3776	4094	2943	5264	4480	3696
esc	FBgn0000588	232	180	206	175	213	276	284	328	185	289	226	251	155	301	202	276	209	329	105	304	246	322	259	338	187	214	215	266	233	206
E(spl)m8-HLH	FBgn0000591	0	0	1	1	0	0	0	0	1	0	0	0	0	0	0	0	1	0	0	0	0	0	0	0	0	0	0	0	0	0
Est-6	FBgn0000592	15727	15701	18410	19650	21395	18303	16422	10594	15501	20666	17780	20109	6641	16382	11052	15862	7392	15801	15154	17996	18023	13152	18605	22997	12444	14862	10121	13141	13849	13094
Est-P	FBgn0000594	0	0	0	0	0	0	0	0	0	0	0	0	0	0	0	0	0	0	0	0	0	0	0	0	0	0	0	0	0	0
eve	FBgn0000606	0	1	0	0	1	0	1	0	1	1	0	1	0	0	0	0	2	0	0	1	2	1	2	3	0	0	0	2	6	1
exd	FBgn0000611	4313	4398	4041	4153	5174	4795	5337	4934	4203	5268	5842	5443	4022	6446	4828	5720	4614	6133	4442	6166	6277	5831	4846	6406	4934	4786	3407	5973	5197	4845
exu	FBgn0000615	124	83	61	53	81	65	130	74	81	69	215	139	37	47	41	31	30	48	68	49	110	92	118	86	63	60	50	57	136	36
e(y)1	FBgn0000617	263	249	231	251	288	233	350	251	234	320	301	331	261	418	207	268	220	308	175	379	326	330	237	323	185	235	151	307	263	175
e(y)2	FBgn0000618	167	165	181	185	189	162	213	128	161	203	217	206	157	220	129	188	157	226	138	211	227	218	149	182	134	178	87	206	142	132
eyg	FBgn0000625	229	201	233	238	240	264	311	261	208	313	336	284	179	372	199	318	249	394	171	324	318	340	251	349	218	263	162	383	310	249
E(z)	FBgn0000629	688	739	660	727	821	785	891	835	715	981	939	955	749	1062	798	948	847	1044	635	1022	1072	1001	799	1006	753	816	541	1072	910	715
fas	FBgn0000633	1702	1547	1471	1383	1736	1676	1987	2093	1615	2214	1815	1875	1011	2762	1493	2053	1522	1908	1232	2531	2239	2382	2049	2539	1751	1545	1294	1793	1870	1559
Fas2	FBgn0000635	3710	3629	3356	3288	4185	3952	4740	4143	3530	4805	4865	4856	2447	5096	3273	4624	3572	5055	3076	5123	5311	5089	4056	5444	3870	3984	2620	5043	4442	3899
Fas3	FBgn0000636	1909	2045	1900	1906	2247	2209	2473	2364	1816	2559	2601	2659	1549	3207	1988	2666	2091	3142	1691	2870	2920	2831	2020	3031	1974	2201	1448	2897	2352	2090
Fbp1	FBgn0000639	6	7	2	8	12	3	12	3	3	2	0	4	1	4	5	3	7	4	1	3	5	3	5	2	1	3	3	1	1	4
Fbp2	FBgn0000640	2	0	0	1	0	1	0	0	0	1	0	0	0	0	1	0	0	0	0	1	0	1	0	1	1	0	1	1	1	0
Fcp3C	FBgn0000644	15	18	13	19	19	27	16	20	15	31	17	19	22	10	12	19	13	17	7	16	22	18	15	19	12	15	4	17	11	13
fj	FBgn0000658	81	88	74	74	74	67	114	102	62	127	80	93	47	155	63	144	64	198	48	177	65	134	68	157	73	105	53	106	96	95
fkh	FBgn0000659	444	474	448	434	577	527	624	611	410	595	680	693	258	730	463	661	470	659	447	704	652	700	629	738	443	510	395	694	658	480
fl(2)d	FBgn0000662	2249	2209	2075	2213	2585	2427	2648	2570	2114	2674	2937	2695	1629	3119	2161	2772	2310	3100	1899	3002	3244	3180	2355	3314	2160	2367	1634	3279	2532	2230
Actn	FBgn0000667	6053	6423	5496	5682	7091	6553	7686	6844	6519	8746	8497	8305	4287	10204	4971	8150	4686	10563	4333	10402	7664	9168	5385	9465	5271	5962	4727	8199	7616	5766
fliI	FBgn0000709	1118	1175	1110	1252	1260	1287	1452	1354	1003	1406	1501	1432	1072	1664	1147	1488	1227	1576	974	1563	1779	1727	1197	1562	1210	1315	906	1526	1398	1139
flw	FBgn0000711	6823	6996	6577	6711	8120	7511	8625	8350	6723	8974	9170	8921	5382	10349	7420	8742	7433	10137	6548	9729	9730	9792	8579	10982	7970	7610	5728	9849	8468	8256
FMRFa	FBgn0000715	208	190	217	215	250	252	278	242	221	285	312	265	225	387	185	245	221	247	149	316	285	312	235	351	258	241	210	301	338	196
fog	FBgn0000719	1533	1633	1654	1703	1913	1836	1893	1773	1502	1984	2138	1973	1284	2372	1541	2145	1731	2656	1446	2382	2455	2382	1782	2433	1571	1672	1278	2678	1820	1596
for	FBgn0000721	8501	8741	8542	8749	9744	8929	9737	7601	8233	10497	11911	10627	7443	9895	8037	7945	8609	10132	7607	9162	11487	9174	8703	9094	8441	8890	5782	10575	9432	6856
FER	FBgn0000723	3328	3321	2587	2678	2886	2991	3369	3179	3020	4091	3771	3392	2538	4048	2554	3366	3037	4372	2328	3857	3942	3998	3182	4285	2922	3275	2187	4575	3531	2977
gd	FBgn0000808	2	3	1	1	0	3	3	1	1	1	2	3	1	1	0	3	1	0	2	0	2	6	1	1	1	0	2	0	5	2
fs(1)K10	FBgn0000810	532	500	457	496	580	548	723	528	513	758	802	738	431	847	531	671	659	740	547	920	778	750	634	716	549	639	409	716	562	536
png	FBgn0000826	3	5	3	4	3	3	5	2	9	2	22	3	0	7	4	8	0	5	1	7	6	5	2	5	1	6	1	2	26	10
fs(1)Ya	FBgn0000927	6	0	0	0	5	0	0	6	13	0	83	1	0	3	0	3	5	0	1	1	0	5	0	7	1	2	1	1	49	1
fs(1)Yb	FBgn0000928	3	2	3	2	7	3	3	1	1	3	0	1	5	2	3	5	0	1	2	3	4	3	1	5	1	3	2	9	7	3
tj	FBgn0000964	657	648	518	660	805	668	817	619	701	798	917	1120	413	851	529	549	527	574	615	657	865	760	674	719	549	624	546	686	630	567
dup	FBgn0000996	155	178	153	139	154	135	150	126	153	239	260	237	76	150	109	175	98	170	120	183	195	208	156	190	141	113	95	131	192	159
ft	FBgn0001075	145	165	119	119	121	139	207	191	139	240	133	125	146	380	154	296	213	405	87	248	213	314	153	215	146	139	141	259	185	193
ftz	FBgn0001077	1	0	0	2	1	1	1	1	1	3	1	0	0	0	1	0	1	4	1	1	0	1	1	2	0	0	2	1	0	0
ftz-f1	FBgn0001078	1996	1755	1740	1727	2091	2093	2428	2218	1778	2428	2273	2199	1257	2661	1923	2192	1892	2465	1812	2563	2799	2639	2181	2688	2028	2030	1498	2373	2175	2043
fu	FBgn0001079	441	455	375	400	476	436	573	447	366	551	555	546	359	609	338	490	432	512	345	572	577	576	416	621	433	473	314	572	531	382
fw	FBgn0001083	870	940	771	818	830	792	1079	1037	557	758	734	754	473	975	553	947	544	945	526	1209	1056	1330	688	1201	813	969	733	1391	1017	885
fy	FBgn0001084	134	129	118	129	145	111	119	133	120	163	154	140	107	178	104	131	121	179	110	148	153	176	122	187	102	139	109	164	129	116
fz	FBgn0001085	387	418	374	408	472	446	487	510	381	539	540	520	348	674	433	593	435	630	304	562	590	603	432	659	383	413	302	509	490	498
fzy	FBgn0001086	4	4	4	1	5	9	1	6	7	5	52	5	8	7	3	2	5	6	6	4	4	3	9	8	0	5	3	4	22	2
g	FBgn0001087	2416	2383	2257	2316	2692	2720	2963	2940	2325	3304	3220	2903	1885	3440	2252	2749	2452	3092	1901	3400	3054	3284	2787	3388	2415	2538	1852	3450	2966	2234
Gal	FBgn0001089	159	175	195	216	191	167	240	185	198	270	208	250	132	272	150	184	115	190	164	234	272	228	156	190	144	163	121	232	225	168
bnb	FBgn0001090	19537	20832	17939	20900	24125	22732	27897	22297	19859	25242	26600	25981	14893	32130	17381	26741	21529	33496	14284	30103	28657	29219	20942	31277	16331	18713	13447	29229	22236	16991
Gapdh1	FBgn0001091	24700	26628	21975	24930	27270	23906	30361	27228	23182	34606	32763	32816	21841	39679	16663	34117	18342	38812	17251	39418	24857	34207	18941	34648	19794	24550	19310	29957	26105	22612
Gapdh2	FBgn0001092	24422	25172	20572	23661	26858	23974	28244	24164	23602	32082	36385	31928	20801	32673	19076	28057	21236	31909	18405	31582	27696	28453	20891	30752	21465	23771	18570	32207	29437	22040
Gdh	FBgn0001098	15128	15827	13240	14554	16126	14957	19504	20002	14440	21792	17624	18300	10505	25294	11236	21735	11571	21920	10139	25681	17420	23647	13958	25193	12448	15363	10377	19790	15325	13416
gdl	FBgn0001099	13	13	11	9	18	12	20	16	17	15	12	17	9	20	6	11	16	17	18	22	14	17	12	15	11	17	3	19	13	9
Galphai	FBgn0001104	1289	1264	1116	1147	1379	1185	1555	1261	1162	1530	1675	1477	1080	1807	1098	1394	1199	1575	1161	1767	1598	1528	1193	1502	1162	1204	746	1569	1286	1050
Gbeta13F	FBgn0001105	7423	7521	7037	7614	8770	8279	9627	8832	7156	10087	10157	9949	5600	11209	7759	9833	7664	10275	8338	12387	12361	12433	9502	12670	9151	9269	6363	11300	10388	9744
DCTN1-p150	FBgn0001108	2336	2414	2137	2363	2610	2622	3016	2653	2135	2952	3186	2889	1926	3354	2055	2913	2389	3344	1877	3209	3183	3281	2303	3239	2042	2389	1672	3263	2598	2118
Gld	FBgn0001112	834	945	663	777	777	895	920	736	600	805	903	748	696	1085	762	1017	1152	1698	582	970	955	909	597	1003	905	1065	442	1330	993	708
Glt	FBgn0001114	40132	36223	29657	32367	31167	29124	36364	18671	39444	42603	47940	40389	15451	26846	23752	19589	21495	23174	26718	22419	46646	26451	31584	24879	23824	27563	23835	28664	35588	25631
gnu	FBgn0001120	8	4	6	3	3	9	2	6	11	9	45	5	12	7	8	6	17	3	2	4	7	12	5	8	4	5	3	4	29	2
Galphao	FBgn0001122	6575	7013	5831	6393	8305	7861	8673	8774	6252	9523	8947	8680	4361	11252	6579	9291	6722	9167	6347	10606	9235	10368	7719	10937	7242	6962	5279	8176	8505	8525
Galphas	FBgn0001123	2147	2175	2126	2297	2628	2361	2795	2598	2105	2941	2976	2879	2108	3662	2419	2937	2507	3366	2236	3618	3132	3318	2500	3320	2441	2377	1604	3110	2660	2345
Got1	FBgn0001124	8813	8952	7895	8839	10157	9271	10479	8256	8815	11703	12482	11081	10453	11498	8071	9829	8638	11210	7481	11122	11260	10088	8632	10691	9002	9862	6936	12342	11143	7653
Got2	FBgn0001125	8940	9098	8896	9531	10597	8777	9347	7101	8335	11797	13960	11791	7158	11636	6550	8548	7066	9873	6495	9133	8986	7802	7710	9315	5934	6650	7521	8747	9782	6784
Gpdh	FBgn0001128	24402	25998	24273	27087	29654	25866	28549	20529	29010	33165	39817	33795	18109	33812	12877	20893	17096	27611	18467	25896	25069	23900	25405	31173	15052	16233	16068	24627	25978	21684
grau	FBgn0001133	582	653	602	673	653	626	691	586	603	789	780	783	703	993	550	819	618	852	540	850	906	952	612	928	615	767	434	878	716	525
Grd	FBgn0001134	340	288	238	231	316	267	380	377	243	362	318	381	189	526	239	354	270	412	210	380	369	480	308	417	284	297	236	375	341	285
grk	FBgn0001137	652	641	730	729	855	744	791	612	756	777	910	833	566	1001	664	940	611	1021	622	904	992	870	729	813	769	738	522	1136	919	630
grn	FBgn0001138	194	234	192	202	242	265	311	305	206	267	280	301	165	367	226	317	296	359	192	372	317	338	250	400	218	254	167	314	275	260
gro	FBgn0001139	2274	2315	2232	2553	2668	2739	2975	2703	2322	2894	3125	2976	1972	3286	2202	2748	2583	3318	1935	3284	3455	3282	2700	3534	2380	2447	1886	3419	3193	2302
Gs1	FBgn0001142	9172	9592	8432	9312	10123	8062	8944	7189	7361	9767	13246	10488	10755	13389	10459	11949	12545	15567	9955	12695	10056	8711	7530	9102	6801	6617	8166	13887	12818	10598
Gs2	FBgn0001145	44710	46675	40469	46071	51951	47726	55360	41902	41121	56802	55691	57045	35981	62619	35990	53448	40643	62187	34327	61272	60690	61433	46222	66579	41324	49658	31517	64396	48349	37856
gsb-n	FBgn0001147	10	13	14	14	16	15	5	7	7	10	12	13	13	23	13	12	15	12	8	8	25	14	15	15	13	16	8	11	10	13
gsb	FBgn0001148	0	1	5	4	5	2	1	2	1	4	5	3	2	1	2	3	4	3	2	0	1	3	1	5	2	4	0	2	3	0
GstD1	FBgn0001149	12877	13046	10516	10988	10862	9281	9917	7041	11463	15289	16596	15417	11129	14987	7470	10169	7828	10404	9721	16487	13411	12169	10542	13408	7873	10189	8721	14702	12763	8338
gt	FBgn0001150	80	61	78	73	56	73	121	89	59	108	74	94	41	130	53	131	48	97	51	145	109	149	70	122	85	84	43	96	90	59
h	FBgn0001168	1069	1039	1021	1303	1396	1252	1184	1102	1081	1483	1558	1729	1226	1739	1136	1156	1157	1477	1212	1558	1525	1367	1206	1440	1182	1268	808	1469	1154	930
H	FBgn0001169	787	854	787	838	937	920	977	914	788	1014	1222	1034	656	1079	792	1023	881	1110	695	1091	1104	1099	911	1124	805	877	629	1142	1027	837
H2.0	FBgn0001170	24	24	18	19	24	18	32	25	16	27	27	24	18	25	12	24	18	27	24	36	35	29	18	28	18	16	10	45	18	18
halo	FBgn0001174	1	0	2	8	2	3	2	3	1	0	2	0	4	1	1	4	3	8	2	3	2	1	2	4	4	4	0	3	1	3
hay	FBgn0001179	404	343	339	305	427	353	469	385	359	542	468	462	317	591	320	426	336	466	294	534	541	532	340	569	312	453	218	418	383	306
hb	FBgn0001180	155	191	164	207	193	194	194	218	178	194	242	200	128	232	149	220	168	246	137	233	240	225	160	230	164	159	154	251	232	203
her	FBgn0001185	614	657	582	615	741	635	744	660	548	873	804	854	572	1000	637	891	692	871	586	915	938	972	693	986	668	698	493	920	719	720
Hex-A	FBgn0001186	9644	10706	9396	10367	11440	11408	12186	11707	9041	13108	13713	12865	9404	16086	9680	13487	11168	16882	8767	15533	13783	16185	11043	16116	10932	11722	7650	16479	11750	11215
Hex-C	FBgn0001187	3223	3143	3206	3032	2911	2378	3039	1712	2725	3743	4412	4060	3278	3115	2686	2371	2586	2661	2747	2611	3429	2597	2324	2549	2670	3317	1833	3088	2890	2098
hfw	FBgn0001189	1080	1103	1099	1174	1257	1106	1273	945	1018	1410	1349	1441	1035	1557	1000	1246	1206	1608	993	1569	1607	1551	1192	1446	1044	1281	737	1606	1133	861
His2Av	FBgn0001197	1559	1642	1406	1563	1793	1684	1866	1576	1481	2014	2139	2006	1495	2345	1580	1974	1666	2131	1443	2146	2123	2251	1605	2126	1417	1529	1075	2001	1778	1405
hook	FBgn0001202	2174	2244	2240	2364	2573	2439	2951	2570	2167	2998	3093	2847	2412	3174	2334	2866	2596	3201	2101	3036	3211	3178	2570	3488	2379	2492	1629	3208	2931	2362
Hmr	FBgn0001206	238	239	201	218	245	246	296	269	189	361	318	321	194	431	205	266	256	350	196	329	335	338	232	326	210	258	189	315	297	201
Hn	FBgn0001208	16440	13913	12866	12607	14268	13231	11391	6758	11979	12273	18399	13646	12122	9387	9928	7339	11160	11311	11092	7985	16769	9806	13339	11655	13194	14971	9759	18555	16059	10716
Hrb98DE	FBgn0001215	5613	4968	4767	4957	5285	5036	6863	5958	5101	7008	6856	6933	3641	8188	5220	6883	5087	7005	4950	8016	8178	7635	6184	7703	4878	5284	3512	6664	5453	4711
Hsc70-1	FBgn0001216	951	1415	1111	1260	1250	1125	1540	1545	799	1323	1301	1423	747	1858	647	1619	898	2284	814	2128	1418	1906	844	1793	513	501	877	1416	813	943
Hsc70-2	FBgn0001217	681	738	242	248	217	209	42	51	617	833	919	907	35	57	41	59	44	61	460	694	193	208	808	1073	45	39	366	473	342	287
Hsc70-3	FBgn0001218	12025	15228	12001	14015	12954	10902	15311	11571	12201	23849	16728	22049	8138	25514	9096	15329	10243	14621	12618	22025	18101	22012	11008	19435	9694	13076	8316	13179	12729	13052
Hsc70-5	FBgn0001220	7668	7888	6790	7332	7732	7056	9937	7997	7444	10901	8974	9699	5960	11347	6727	9403	7061	10138	6552	10494	11093	11692	7866	10869	6724	8113	5231	8807	7536	6951
Hsf	FBgn0001222	1531	1561	1563	1650	1735	1646	1877	1643	1452	1847	2096	1859	1452	2156	1563	1837	1764	2198	1500	2048	2213	2001	1624	2147	1525	1654	1138	2100	1773	1498
Hsp22	FBgn0001223	0	0	0	0	0	0	0	0	0	0	0	0	0	0	0	0	0	0	0	0	0	0	0	0	0	0	0	0	0	0
Hsp23	FBgn0001224	201	175	204	213	229	244	244	163	272	314	280	302	298	314	285	248	257	180	274	320	275	261	196	251	256	274	176	244	245	241
Hsp26	FBgn0001225	267	199	206	155	200	196	207	153	285	261	352	255	222	248	261	201	283	278	382	260	259	196	125	183	328	356	123	232	465	190
Hsp27	FBgn0001226	93	96	113	121	118	88	127	118	114	122	302	153	68	143	76	107	98	146	88	145	166	141	82	129	73	97	47	106	223	100
Hsp67Ba	FBgn0001227	24	32	24	22	33	34	33	34	21	29	36	40	28	64	27	42	25	30	32	46	27	42	31	40	30	17	23	23	35	20
Hsp67Bb	FBgn0001228	0	1	0	0	0	0	0	0	0	0	0	0	0	0	2	0	0	0	0	0	0	1	0	0	0	0	0	0	0	0
Hsp67Bc	FBgn0001229	148	133	107	128	133	134	194	142	127	195	145	149	119	233	114	186	120	186	136	221	134	177	96	222	134	148	69	143	191	149
Hsp68	FBgn0001230	383	311	418	390	759	514	681	378	436	476	654	541	428	905	406	443	425	454	728	807	650	516	477	605	302	242	525	435	509	334
Hsp83	FBgn0001233	19420	10222	14593	9934	14754	7226	35835	15951	17503	42349	19620	29559	15954	41000	17559	20337	18587	16371	32434	48325	30056	32304	17286	21391	14440	20030	8790	14370	15041	10407
Hsromega	FBgn0001234	3273	3318	3640	4053	4313	4244	5411	4804	3591	5220	4312	4244	3433	5655	3713	5371	4012	5430	4687	5464	5380	4997	3868	5385	3859	4441	2880	5592	4993	4165
hth	FBgn0001235	5508	5863	5137	5280	6149	6036	6869	5891	5664	7131	7345	7224	3854	7690	5826	6654	5421	7426	5813	7330	7929	7599	6654	8298	6264	6420	4395	7293	6735	6640
Ide	FBgn0001247	2516	2702	2553	2765	3054	2892	3323	3010	2620	3493	3453	3214	2292	3935	2609	3468	2861	3565	2331	3624	3895	3788	2754	3867	2614	2765	1914	3538	3066	2816
Idh	FBgn0001248	19058	16383	15647	15676	16905	14172	19305	13224	16576	20110	21209	19535	12995	24640	13057	13824	12199	16572	13634	17770	26628	19625	18597	20894	14019	16245	11518	16508	16781	12148
if	FBgn0001250	3311	3594	3415	3600	4287	4171	4639	3863	3504	4469	4637	4198	2749	4783	3046	4441	3166	4902	2742	4678	4983	4945	3528	4755	3636	4148	3207	5654	4836	3652
ImpE1	FBgn0001253	76	75	65	81	147	144	160	137	69	138	173	170	66	139	75	122	76	93	80	209	131	175	166	289	82	87	75	143	89	72
ImpE2	FBgn0001254	2	2	3	2	4	0	1	2	2	1	2	1	5	4	2	3	2	3	1	3	2	3	0	1	0	2	0	2	3	0
ImpE3	FBgn0001255	17	13	9	16	17	17	12	17	16	20	18	13	17	17	5	13	14	13	6	15	15	8	14	13	14	14	9	18	22	16
ImpL1	FBgn0001256	38	25	42	41	50	42	50	42	26	13	57	41	7	7	29	37	27	33	33	35	65	51	41	57	8	5	35	31	16	19
ImpL2	FBgn0001257	2302	2337	1959	1866	2594	2056	2655	2203	1690	2183	2826	2067	1389	2638	2207	2163	2325	2278	2302	2522	3684	2857	2952	3177	1639	1574	1492	2669	2202	1724
ImpL3	FBgn0001258	330	347	435	427	435	474	440	314	415	522	673	453	448	306	405	344	287	291	367	323	585	302	313	270	394	472	325	387	497	281
in	FBgn0001259	79	75	113	114	82	92	110	84	75	109	115	125	117	146	98	145	122	174	79	115	139	106	86	140	98	146	45	130	111	85
inaD	FBgn0001263	24730	21096	21267	21323	23416	20713	30614	26383	23060	31163	30938	30165	17947	32649	20013	27376	22463	31046	19342	33929	35518	32864	25537	33625	18420	19969	15312	31061	21939	17981
inv	FBgn0001269	156	167	157	166	161	144	226	174	121	183	164	195	152	244	128	223	195	276	131	234	212	247	144	212	147	185	123	264	200	126
ix	FBgn0001276	192	213	206	197	229	221	277	241	185	254	260	281	196	355	190	257	203	263	183	304	310	322	235	281	174	209	139	272	244	179
janA	FBgn0001280	549	584	515	568	544	466	523	382	464	586	597	627	500	670	425	521	442	584	453	556	672	582	501	557	475	544	292	581	567	491
janB	FBgn0001281	0	0	1	1	0	0	1	0	0	0	0	1	1	1	0	0	0	0	0	3	2	1	1	0	0	0	0	0	0	2
Jon44E	FBgn0001285	6	9	10	6	9	8	10	7	18	12	17	4	14	10	17	4	12	15	8	7	15	7	6	19	22	15	7	12	25	14
Jra	FBgn0001291	1251	1302	1218	1192	1341	1299	1405	1204	1089	1470	1713	1466	1183	1602	1226	1436	1374	1810	1160	1697	1988	1634	1235	1633	1082	1300	876	1764	1438	1160
kar	FBgn0001296	2878	2880	2733	2902	3400	3259	3804	3136	2774	3495	3453	3350	2479	4439	2416	4019	2729	4753	1966	4385	3860	4768	2973	4965	2539	2980	1988	4381	3449	2567
kay	FBgn0001297	5184	5219	5032	5330	6093	5926	6850	5691	5340	7012	7484	6986	4988	8216	5735	6676	5619	7928	4830	7850	7793	7314	5562	7181	6423	7238	4166	8965	6765	5725
kel	FBgn0001301	865	899	872	850	994	963	1034	954	725	1033	1189	1050	692	1338	799	1213	857	1532	668	1221	1199	1394	938	1364	893	981	615	1376	1076	843
Khc	FBgn0001308	4906	4979	4329	4626	5300	4932	6148	5237	4634	6645	6345	6143	3327	7009	4156	5896	4472	6522	3967	6724	6470	6744	4868	6546	4166	4780	3364	6219	5091	4379
kkv	FBgn0001311	79	76	51	69	43	65	108	153	41	151	46	88	30	346	22	213	49	315	37	285	73	238	46	223	57	78	56	66	53	99
kl-2	FBgn0001313	2	0	1	1	2	0	1	0	0	1	1	0	0	1	0	0	0	1	0	0	0	0	0	0	0	0	1	1	0	0
klar	FBgn0001316	4035	4312	4505	4458	5034	4966	5445	5100	4379	6059	5678	5414	3780	6854	4376	5998	4659	6897	3323	6017	6295	6386	4853	6791	4580	5217	3009	6279	5354	4508
kn	FBgn0001319	264	253	208	216	257	269	244	290	227	268	301	315	174	355	222	264	250	302	178	312	311	355	267	340	238	228	194	307	324	287
kni	FBgn0001320	388	469	447	477	542	521	599	496	410	646	606	572	395	745	386	656	496	811	363	727	626	647	459	694	429	491	382	775	506	424
knk	FBgn0001321	29	27	33	19	27	38	38	41	21	36	29	32	34	41	24	35	35	50	18	21	37	40	25	32	22	32	19	34	36	26
knrl	FBgn0001323	435	426	435	436	556	473	558	494	426	613	597	511	353	624	408	593	509	705	383	631	636	656	523	661	516	604	315	726	574	481
kto	FBgn0001324	1378	1317	1299	1294	1536	1430	1821	1496	1287	1897	1776	1722	1295	2010	1330	1553	1480	1724	1113	1777	1968	1968	1317	1945	1227	1517	998	1747	1656	1164
Kr	FBgn0001325	61	49	47	40	54	64	56	60	40	78	63	51	30	83	48	61	52	82	48	74	72	77	55	100	53	53	42	77	58	42
kz	FBgn0001330	279	204	240	234	292	252	340	269	231	383	331	338	184	347	231	306	272	313	234	384	415	476	337	423	278	311	192	369	318	208
l(1)1Bi	FBgn0001341	324	327	317	255	347	319	408	339	287	445	342	411	200	438	290	376	324	435	286	476	474	547	373	443	307	415	230	429	362	330
egh	FBgn0001404	3150	3159	3064	3316	3798	3710	4013	3717	3170	4042	4693	3944	2678	4730	3280	3991	3551	4735	3013	4694	4783	4465	3591	4716	3399	3464	2386	4973	4028	3500
l(1)10Bb	FBgn0001491	502	563	575	578	673	607	648	593	579	706	779	690	583	788	572	701	555	749	579	665	824	746	635	781	607	605	450	784	678	566
Hlc	FBgn0001565	2669	2498	3007	3002	2953	2982	3067	2794	2594	3482	3495	3353	4045	4246	3057	4007	3355	4806	2451	4139	3813	3989	3269	4275	3263	3820	1790	5118	3397	2510
Grip91	FBgn0001612	409	439	374	448	446	438	552	491	428	642	628	634	323	750	419	599	453	562	384	723	651	676	487	689	386	488	335	589	517	425
dlg1	FBgn0001624	8688	8206	8534	8371	8994	9022	12186	11557	9158	11904	10895	11023	6231	12810	8073	10873	8396	12155	7764	13816	12350	12551	9333	12806	8991	9084	7808	12735	11348	10036
ifc	FBgn0001941	1072	996	1063	1074	1309	1165	1323	1151	1029	1374	1578	1498	1169	1557	1153	1359	1220	1529	1037	1526	1581	1418	1282	1468	1020	1107	811	1705	1334	1055
eIF-4a	FBgn0001942	45045	45210	51418	51887	53500	50578	54173	45588	47908	59479	67641	64584	58087	70029	45288	62474	52466	74196	40312	65760	64971	65470	54735	69225	51635	59341	35164	76326	56638	41334
Arpc1	FBgn0001961	2556	2656	2884	3120	2945	2674	3457	2675	2491	3456	3463	3519	3280	3753	2498	3255	3059	3950	2183	3775	3657	3570	2817	3885	2460	3007	2131	4062	3053	2200
Sos	FBgn0001965	2384	2489	2233	2254	2713	2589	3247	2907	2339	3318	3165	3192	1838	3546	2111	2943	2598	3204	1737	3405	3343	3678	2529	3500	2163	2453	1845	3217	2914	2104
NimC3	FBgn0001967	0	0	0	0	0	0	0	0	0	0	0	0	0	0	0	0	0	0	0	0	1	0	0	0	0	0	0	0	0	0
Pgant35A	FBgn0001970	2	3	6	1	5	4	5	0	2	5	8	2	0	1	1	5	6	4	1	3	0	3	4	7	0	1	1	3	1	1
l(2)35Bd	FBgn0001974	243	228	217	241	258	223	308	236	261	307	297	316	240	339	239	291	267	354	245	290	342	327	261	354	225	224	179	367	295	228
CIAPIN1	FBgn0001977	488	507	502	499	575	522	580	539	417	655	599	602	538	655	488	508	527	663	513	688	684	675	455	627	465	530	385	687	583	396
stc	FBgn0001978	1351	1316	1384	1543	1455	1466	1783	1456	1333	1946	1769	1668	1429	2163	1402	1589	1562	1941	1207	1962	2110	2182	1449	2041	1429	1768	909	1820	1508	1083
esg	FBgn0001981	17	18	17	22	21	14	21	14	20	20	28	22	13	29	19	26	20	33	26	22	29	25	13	24	20	13	26	31	28	29
wor	FBgn0001983	2	2	0	0	0	0	0	0	0	0	0	0	0	2	0	0	0	0	0	0	0	0	1	0	2	0	0	1	0	0
l(2)35Df	FBgn0001986	639	591	553	620	626	643	778	621	636	831	804	786	502	833	574	697	618	856	505	796	874	962	745	887	579	774	377	796	669	493
Gli	FBgn0001987	1404	1563	1441	1459	1701	1721	1875	1567	1302	1745	2051	1919	1261	2049	1404	1923	1446	2150	1255	2068	2072	1974	1494	1989	1434	1564	1171	2200	1807	1558
ND-B17	FBgn0001989	2408	2627	2513	2722	2697	2528	3217	2530	2453	3344	3133	3356	2569	3766	2146	3352	2213	3939	1973	3669	3052	3431	2360	3621	2174	2450	1996	3218	2663	2102
wek	FBgn0001990	300	280	268	268	297	286	314	245	221	404	368	375	301	412	299	330	300	337	259	342	400	398	252	345	239	377	189	393	264	237
Ca-alpha1D	FBgn0001991	4800	4590	3840	3561	4405	4880	5273	5867	3676	5335	4787	4371	2205	5519	3416	5450	4515	6530	3146	5965	5447	6116	4872	6389	3717	3888	3696	5207	5117	4629
Cyp303a1	FBgn0001992	43	61	51	60	61	46	70	79	65	117	83	85	38	84	70	102	36	78	56	110	76	103	48	89	53	63	36	61	36	49
crp	FBgn0001994	3170	2907	3175	3163	3847	3626	4120	3777	2959	4259	4326	4111	2515	4577	3280	3640	3725	4187	2826	4819	4765	4627	3702	4551	3372	3520	2339	4791	4078	2938
mRpL4	FBgn0001995	590	608	503	599	588	580	713	593	556	951	719	803	526	1009	439	807	615	1021	508	937	738	925	606	867	501	644	420	799	561	504
l(2)37Bb	FBgn0002021	626	698	647	650	678	618	710	585	614	944	783	795	784	1073	656	817	720	1025	582	941	960	1030	639	955	616	718	479	973	706	584
Catsup	FBgn0002022	1442	1558	1457	1574	1690	1566	1704	1309	1401	1947	1968	1866	1397	1933	1257	1573	1444	1824	1206	1697	2066	1926	1605	1987	1396	1541	1071	1976	1612	1430
Lim3	FBgn0002023	244	284	256	283	279	321	339	359	260	327	396	385	189	442	275	374	270	356	230	411	333	438	392	441	263	290	245	350	350	298
l(2)37Cc	FBgn0002031	2901	2953	2743	2923	2876	2710	3378	2731	2902	3935	3399	3681	2996	4155	2465	3331	2830	3950	2262	3976	3582	3779	2756	3919	2637	3373	1941	3481	2914	2276
CG10561	FBgn0002036	1141	1079	1130	1101	1180	1077	1362	1250	1173	1465	1450	1480	1209	1725	1041	1439	1114	1616	908	1615	1649	1601	1151	1683	1146	1200	930	1649	1295	1038
swm	FBgn0002044	2060	2204	1988	2215	2711	2390	2711	2394	2050	2815	2957	2766	1567	3246	1930	2639	2205	3144	1895	3081	3012	3171	2343	3261	2022	2344	1687	3102	2478	2083
AspRS	FBgn0002069	457	497	476	527	445	417	485	374	452	652	567	578	560	565	539	498	520	618	416	494	627	566	482	546	521	604	319	578	495	376
l(2)gl	FBgn0002121	1850	2089	2176	2194	2296	2249	2234	2052	2071	2420	2991	2561	2118	2918	2659	2885	2939	3857	2158	2845	3127	2476	2478	3042	2604	2437	1707	3369	2837	2608
l(2)tid	FBgn0002174	1506	1514	1338	1511	1494	1285	1910	1460	1473	1918	1690	1876	1402	2035	1262	1561	1358	1960	1099	1934	2149	2175	1519	2072	1207	1553	1002	1888	1307	1062
dre4	FBgn0002183	1235	1209	1193	1388	1288	1245	1307	1171	1009	1499	1508	1410	1266	1627	1285	1378	1409	1613	1086	1558	1719	1740	1227	1718	1206	1400	767	1629	1545	1080
l(3)73Ah	FBgn0002283	525	538	480	538	586	525	676	524	454	661	698	592	510	788	492	649	569	725	472	757	745	747	565	726	504	524	349	765	627	469
Prosbeta6	FBgn0002284	1488	1668	1497	1728	1740	1604	1735	1383	1522	2025	1955	1938	1860	2098	1381	1832	1605	2093	1393	1838	2085	1980	1490	1927	1374	1597	1200	2091	1747	1326
sas	FBgn0002306	1634	1754	1554	1749	2234	1933	2045	1744	1511	2299	2177	2023	950	2265	1212	1937	1731	2351	1183	2350	2125	2464	1762	2514	1593	1877	1321	2687	2022	1756
l(3)87Df	FBgn0002354	210	201	234	259	272	214	276	239	236	323	283	301	258	362	232	314	260	396	240	348	328	395	204	333	246	259	166	323	253	201
dco	FBgn0002413	2597	2776	2443	2677	3021	2926	3166	3170	2566	3485	3673	3492	2322	4078	2530	3385	2923	3716	2205	3712	3620	3648	2894	4005	2790	2960	2051	3736	3293	2735
hyd	FBgn0002431	5951	6082	5714	5361	7019	6793	7781	6672	5650	7658	7631	7188	3992	7593	5469	6890	5742	7254	4966	7439	8584	8169	6946	8021	6167	6730	4450	7487	6897	5861
l(3)mbn	FBgn0002440	2	0	2	3	1	1	0	0	0	5	2	2	1	4	0	7	1	3	0	1	2	4	0	2	0	3	0	0	2	1
l(3)mbt	FBgn0002441	1362	1234	1226	1386	1442	1297	1847	1404	1321	2131	1800	1858	1110	2117	1189	1691	1394	1887	1124	2146	1846	2097	1318	1877	1231	1482	1033	1798	1577	1160
sti	FBgn0002466	14	14	9	23	13	22	30	14	21	37	44	25	16	21	23	30	28	40	30	27	25	30	19	22	23	14	16	45	41	30
pho	FBgn0002521	1305	1416	1329	1370	1661	1561	1701	1681	1397	1757	1914	1794	1274	2015	1738	1798	1555	2045	1603	1994	2015	1858	1578	2072	1666	1514	1031	2071	1781	1761
lab	FBgn0002522	82	85	61	94	85	100	96	96	73	104	100	111	52	129	67	103	70	139	78	141	111	124	69	120	76	86	66	121	76	78
lace	FBgn0002524	1055	1168	1091	1214	1314	1209	1300	1187	1099	1470	1511	1358	1021	1664	1163	1298	1222	1545	1038	1438	1580	1402	1239	1488	1171	1188	805	1576	1439	1214
Lam	FBgn0002525	911	920	830	961	1163	1064	1334	1135	914	1365	1230	1378	781	1541	993	1213	1020	1320	874	1430	1319	1367	1034	1470	908	1051	712	1401	1127	896
LanA	FBgn0002526	3799	3854	3493	3279	3746	3749	4039	3055	3139	4419	4413	4176	1940	4818	2317	3195	1778	2988	2363	3779	4062	4053	3234	3944	2872	3607	2650	3380	3434	3279
Lcp1	FBgn0002531	7	9	3	9	5	7	6	8	6	12	10	10	2	10	7	7	2	3	7	9	7	7	12	2	7	7	13	7	11	5
Lcp2	FBgn0002533	2	6	4	1	7	5	3	6	1	2	7	3	3	4	4	3	3	2	2	2	5	5	1	4	1	0	4	1	2	5
Lcp3	FBgn0002534	2	3	2	3	2	2	1	5	5	1	7	4	3	5	0	4	0	4	0	3	3	8	2	2	1	5	0	3	4	7
Lcp4	FBgn0002535	0	0	1	1	0	0	0	0	1	1	0	1	0	0	0	0	0	0	0	2	0	1	0	0	0	0	0	0	0	0
lds	FBgn0002542	152	169	116	124	137	109	159	144	114	174	194	216	163	289	143	226	189	262	118	208	254	248	155	231	151	157	76	177	179	151
robo2	FBgn0002543	320	333	304	294	356	374	390	385	350	472	462	386	329	490	302	432	410	490	252	344	427	407	357	480	316	391	289	546	439	357
lin	FBgn0002552	468	471	506	518	539	506	593	486	438	661	669	597	459	684	409	546	586	652	437	689	655	643	524	718	409	506	353	770	562	381
l(1)sc	FBgn0002561	0	0	0	0	0	0	0	0	0	0	0	0	0	0	0	0	0	1	0	0	0	0	0	0	0	0	0	0	0	0
Lsp1alpha	FBgn0002562	9	9	6	19	9	4	3	7	25	7	13	6	10	2	7	2	2	0	2	0	6	2	3	0	6	3	2	3	5	5
Lsp1beta	FBgn0002563	11346	4842	1386	2130	1341	1070	679	34	334	120	675	249	173	7	633	45	184	26	212	14	810	25	173	21	939	388	334	103	832	194
Lsp1gamma	FBgn0002564	8	69	24	66	55	91	127	77	59	76	281	160	12	91	74	236	2	41	111	48	53	22	81	43	13	55	25	24	139	80
Lsp2	FBgn0002565	1654	706	728	898	512	285	457	6	1412	465	793	321	28	0	296	5	4	1	258	1	137	1	122	7	191	96	151	16	403	101
lt	FBgn0002566	1529	1654	1672	1799	2022	1874	2093	1878	1597	2198	2273	2185	1501	2466	1984	2179	1751	2239	1919	2191	2478	2088	1892	2344	2079	1936	1272	2375	1990	2083
Rab32	FBgn0002567	11084	12010	9998	10727	10812	11141	14554	10924	10159	12852	12549	12726	7809	14938	8741	13423	9814	16815	7373	12917	14446	13943	10799	15376	7956	9568	7195	14582	10947	9228
Mal-A2	FBgn0002569	23	21	12	13	12	17	33	24	15	11	54	43	6	11	16	13	6	5	10	6	25	19	13	5	34	57	19	21	32	28
Mal-A1	FBgn0002570	104	224	113	161	130	158	198	193	110	172	828	212	133	221	139	224	141	236	141	225	163	163	343	236	176	214	473	314	183	155
Mal-A3	FBgn0002571	3	4	2	0	1	0	2	10	5	2	6	10	1	2	0	2	0	0	1	0	1	4	3	2	4	5	1	1	7	14
sens	FBgn0002573	22	16	21	28	31	23	24	29	27	35	22	38	29	29	21	27	28	37	15	31	21	41	30	51	18	21	12	51	34	39
lz	FBgn0002576	567	507	529	530	671	647	859	703	580	695	703	699	580	946	583	674	621	782	448	825	861	736	568	741	467	580	398	771	560	474
m	FBgn0002577	10	15	4	16	13	13	22	14	11	13	22	13	9	20	11	10	10	10	7	20	14	23	13	22	12	9	8	16	12	8
Kaz-m1	FBgn0002578	19	110	22	37	18	60	54	51	29	21	168	98	13	25	51	32	3	27	97	66	32	17	209	21	62	78	79	41	97	58
RpL36	FBgn0002579	21396	21648	31052	26955	25100	23097	25119	18868	22695	27971	30832	30143	47873	27740	26826	26190	26877	31728	23764	27887	33402	28546	26265	27915	30678	32827	28162	33212	29400	18736
RpS5a	FBgn0002590	27695	27212	30918	31266	31162	29020	30846	23440	28641	34248	39432	37110	28125	31828	22371	30786	26570	38388	21793	33053	39640	36828	31863	35024	29224	34671	21388	42645	34236	20940
E(spl)m2-BFM	FBgn0002592	50	79	48	62	66	66	62	62	37	61	61	58	35	86	27	60	64	89	42	99	63	69	40	70	53	40	42	65	72	36
RpLP1	FBgn0002593	28365	26157	32279	32738	33824	30234	31281	24373	30088	34690	40231	38115	35783	33088	27638	31338	27597	36979	26752	32967	40235	35382	34112	35550	36690	40171	22849	44998	28329	22922
RpL19	FBgn0002607	31174	31094	35854	34442	34567	31815	34209	25794	32931	38058	45782	42351	43863	36986	30704	35773	32440	43363	27292	36976	42676	38622	35286	38127	35628	40685	25381	46602	35984	24782
E(spl)m3-HLH	FBgn0002609	70	84	80	92	85	96	103	98	65	100	94	111	79	172	62	113	77	131	76	121	100	148	74	138	54	77	65	107	100	90
RpS3	FBgn0002622	32783	32529	35542	34395	34660	32828	36951	28361	33651	40862	43983	41658	43748	39419	28249	37196	35473	47969	26813	40982	44404	43209	36144	41251	35396	42620	26819	50223	40033	24321
RpL32	FBgn0002626	23940	23289	26077	26921	25409	24066	25299	19186	23698	27475	32187	30885	28528	27134	20718	25110	24117	32072	18361	27831	33437	30115	25712	28431	24599	28709	17498	35237	29672	15859
E(spl)m4-BFM	FBgn0002629	1	0	0	0	0	0	0	0	0	0	0	0	0	0	0	0	0	0	1	0	2	0	0	0	0	0	0	0	0	0
E(spl)m5-HLH	FBgn0002631	0	0	0	0	0	3	0	0	0	0	0	0	0	1	0	0	0	0	1	0	0	0	0	3	0	0	1	1	0	1
E(spl)m6-BFM	FBgn0002632	0	0	2	2	0	2	0	1	0	1	1	2	0	3	1	1	0	2	1	2	2	1	1	1	0	0	0	4	1	0
E(spl)m7-HLH	FBgn0002633	6	7	2	9	5	3	6	5	8	9	3	7	1	13	0	11	4	8	5	8	9	9	3	5	9	9	5	12	4	6
Rcc1	FBgn0002638	715	822	799	829	814	839	908	742	743	1099	1001	997	956	1092	751	892	819	1004	688	1001	1113	1136	784	1077	789	897	527	849	876	642
mal	FBgn0002641	420	469	422	401	519	407	480	334	430	614	542	608	471	591	364	450	469	514	332	499	499	483	362	479	435	472	307	528	501	357
mam	FBgn0002643	3080	2785	2759	2732	3355	3254	4016	3348	3048	4230	3988	3940	2038	4285	2596	3513	2843	3515	2359	4196	4300	4351	3337	4293	2948	3338	2443	3746	3579	2685
Map205	FBgn0002645	2032	2158	2011	1968	2646	2398	2256	1929	2137	2750	2876	2757	1809	3291	2127	2831	2375	3563	1889	2982	2943	3054	2337	3167	2638	2573	1909	3661	2475	2336
twe	FBgn0002673	40	30	40	26	49	34	54	48	40	55	69	38	38	53	33	50	37	48	42	60	58	53	39	54	36	48	21	59	66	37
mei-9	FBgn0002707	193	215	230	241	287	263	230	244	201	278	293	285	200	277	198	272	204	258	167	244	324	282	207	334	227	274	156	295	288	194
mei-218	FBgn0002709	3	8	8	6	4	7	9	7	5	8	5	5	1	22	6	5	2	8	11	9	7	6	9	9	3	10	4	7	3	7
mei-S332	FBgn0002715	35	34	33	51	41	41	50	57	52	73	67	69	38	72	41	47	53	63	51	88	64	74	56	62	40	48	28	58	37	38
mei-W68	FBgn0002716	23	12	17	14	23	12	25	17	14	25	26	20	16	28	23	23	19	17	19	17	29	31	27	25	21	17	12	31	12	12
Men	FBgn0002719	20787	19957	15423	16087	21342	19492	19328	17940	20197	18414	23445	16006	12191	16852	14443	17218	16306	23553	12066	19239	23250	20964	15587	21573	20956	18917	10992	20617	23953	15560
Met	FBgn0002723	1183	1110	1152	1114	1280	1289	1448	1344	1103	1578	1455	1429	915	1660	1127	1464	1159	1601	1102	1747	1684	1715	1399	1763	1228	1233	958	1654	1453	1290
E(spl)malpha-BFM	FBgn0002732	9	4	6	4	4	5	9	11	4	8	14	9	10	11	7	18	5	5	7	15	1	7	4	11	7	8	4	17	13	8
E(spl)mbeta-HLH	FBgn0002733	225	224	257	252	291	242	225	252	246	388	307	327	347	411	202	311	266	411	193	386	368	399	250	402	259	286	170	389	291	216
E(spl)mdelta-HLH	FBgn0002734	1	0	0	1	1	0	2	1	0	0	1	0	1	0	1	0	0	0	0	1	1	0	0	0	0	0	1	0	0	0
E(spl)mgamma-HLH	FBgn0002735	0	2	0	0	0	1	1	3	1	1	1	2	0	1	2	2	0	0	2	3	0	1	1	1	0	0	1	1	4	1
mago	FBgn0002736	496	498	452	505	542	504	598	459	454	651	717	648	492	649	456	544	438	658	460	616	661	667	492	626	430	506	405	630	576	458
Mlc1	FBgn0002772	6162	7307	6714	7387	7973	7275	9027	9839	6556	10577	8506	9081	5368	14528	6410	13563	4842	16153	5573	15922	7841	13207	5618	12510	5583	6717	4581	8618	7534	7542
Mlc2	FBgn0002773	23749	29540	23594	26839	28593	26506	36058	37090	22437	35553	29185	32408	15329	53048	20702	47180	17411	60569	18899	53825	28878	45199	19250	43915	19502	22714	18467	30691	27384	28136
mle	FBgn0002774	2350	2299	2283	2443	2608	2571	2866	2925	2273	3041	3033	2887	1901	3549	2173	2963	2437	3401	2033	3282	3306	3301	2717	3427	2207	2308	1805	3282	2663	2138
msl-3	FBgn0002775	342	324	322	329	379	366	377	378	254	432	453	401	365	526	344	398	408	489	318	495	498	489	410	488	345	385	246	525	458	343
mnd	FBgn0002778	1019	1011	1021	985	1171	991	1254	1049	990	1245	1313	1279	868	1486	995	1181	1061	1355	994	1361	1622	1545	1069	1567	1192	1360	844	1557	1291	1207
mod	FBgn0002780	2720	2810	2663	2869	3239	2925	3615	3000	3065	3689	3547	3700	1814	3799	2702	3623	2590	4203	2581	3617	4510	4998	3688	4259	3433	3625	2009	3779	2974	3216
mod(mdg4)	FBgn0002781	3361	3229	2953	3320	3644	3684	4156	3687	3034	4300	4265	4279	2851	5196	2823	4202	3462	4482	2631	5126	4505	4788	3438	4676	2933	3499	2289	4715	3790	2897
mor	FBgn0002783	1783	1781	1644	1940	2007	2120	2285	2029	1722	2413	2537	2419	1463	2585	1590	2117	1923	2297	1453	2389	2625	2515	1959	2531	1682	1872	1408	2518	2219	1592
Rpn8	FBgn0002787	2089	2223	1999	2243	2361	2154	2458	2023	1873	2759	2702	2593	1898	2884	1769	2420	2107	2811	1749	2739	2953	2842	1931	2825	1767	2047	1412	2800	2432	1969
Mp20	FBgn0002789	3410	2558	4004	3459	5048	3968	4564	2839	3783	3799	3930	3640	2376	3039	3028	2864	3192	4592	3199	4131	6157	4192	3322	3674	5060	5225	2990	5396	5568	3073
mr	FBgn0002791	338	388	382	371	421	348	460	407	355	539	490	564	369	589	424	487	499	546	417	560	607	580	419	567	415	520	279	570	454	395
ms(3)K81	FBgn0002838	0	0	1	0	0	2	0	0	0	2	1	1	0	0	0	0	0	1	0	0	1	0	0	0	1	1	1	0	0	0
sa	FBgn0002842	3	0	1	1	0	0	1	0	1	1	4	1	0	0	3	1	3	2	0	2	1	1	0	3	0	0	2	5	1	0
Acp26Aa	FBgn0002855	0	0	0	0	0	0	0	0	0	0	0	0	0	0	0	0	0	0	0	0	0	2	0	0	0	0	0	0	0	0
Acp26Ab	FBgn0002856	0	0	1	0	2	0	0	0	0	0	0	0	0	0	0	0	0	0	0	0	0	0	0	0	0	0	0	0	0	0
Mst87F	FBgn0002862	2	2	3	3	6	4	2	2	1	1	1	1	2	10	6	5	1	7	4	4	3	8	3	3	4	4	3	11	1	0
Acp95EF	FBgn0002863	0	0	0	0	0	0	0	0	0	0	0	0	0	0	0	0	0	0	0	0	0	0	0	0	0	0	0	0	0	0
Mst98Ca	FBgn0002865	1	1	0	2	1	0	0	0	0	1	2	0	2	0	0	0	0	0	1	0	0	0	0	0	2	3	1	0	0	0
MtnA	FBgn0002868	5870	4237	12785	10801	13679	12495	16732	9580	7976	7645	14939	14104	13026	10693	6114	6411	7610	9402	7957	9356	15687	10690	9437	8512	17643	17136	10410	21792	13978	5158
MtnB	FBgn0002869	2	10	13	8	4	8	19	15	15	26	12	13	24	47	13	19	7	19	5	31	7	20	5	11	4	8	3	3	15	47
mu2	FBgn0002872	159	174	142	192	178	176	244	189	165	308	224	252	158	349	148	279	148	240	157	304	241	290	153	237	168	212	123	218	212	195
mud	FBgn0002873	14	7	18	22	25	22	18	14	32	16	79	16	5	10	14	21	13	31	17	16	24	23	15	22	18	8	5	19	33	8
mus101	FBgn0002878	175	198	168	163	225	222	246	232	161	308	229	264	159	296	167	209	193	227	132	278	244	318	195	298	166	182	139	264	214	147
mus201	FBgn0002887	347	343	303	318	373	370	417	350	334	411	493	415	236	498	325	453	347	488	261	461	478	478	349	471	317	366	243	475	360	392
mus205	FBgn0002891	263	308	283	273	340	316	326	302	283	473	428	348	241	360	300	324	398	405	251	346	353	341	303	464	329	383	267	493	347	260
mus301	FBgn0002899	31	52	43	54	49	63	41	48	65	92	60	75	28	95	31	52	30	41	35	42	79	96	54	70	25	51	22	28	61	56
mus304	FBgn0002901	98	68	83	98	98	81	137	86	88	136	135	120	86	160	81	115	91	102	82	140	131	117	90	105	94	95	69	124	103	71
mus308	FBgn0002905	206	176	150	141	193	184	184	150	171	232	191	208	120	197	148	162	172	189	170	256	272	297	193	237	153	214	134	188	196	156
Blm	FBgn0002906	156	189	165	161	201	217	243	196	164	236	220	236	156	303	173	238	193	276	144	305	287	304	200	305	145	227	129	273	201	193
mus312	FBgn0002909	0	0	0	0	0	0	0	0	0	0	0	0	0	0	0	0	0	0	0	0	0	0	0	0	0	0	0	0	0	0
Myb	FBgn0002914	1983	1940	1966	2160	2285	2259	2498	2352	1832	2600	2695	2574	2004	3257	2005	2771	2507	3399	1842	3094	2953	3384	2308	3150	2071	2408	1378	3205	2466	1914
na	FBgn0002917	3147	3039	2870	3047	3399	3613	4040	4162	2777	4333	3598	3727	2078	4489	2672	3869	3092	3779	2243	4432	4425	4794	3469	4890	2748	2899	2487	3712	3631	2796
Atpalpha	FBgn0002921	106787	108664	93036	97195	121448	118149	132729	134625	97389	145185	139845	135323	60305	164992	86243	145035	95939	153444	76473	165749	136699	163602	111004	170936	101119	109363	77365	138773	127344	118470
nau	FBgn0002922	23	38	18	18	15	20	34	30	25	47	29	23	12	43	26	48	41	50	25	43	41	34	37	35	28	39	21	39	38	25
ncd	FBgn0002924	87	111	122	107	126	138	119	101	99	142	122	74	71	128	88	125	165	205	78	177	91	124	116	186	80	104	73	139	121	89
ndl	FBgn0002926	0	1	0	0	1	3	0	3	1	1	1	0	0	2	0	2	0	0	1	0	2	2	0	5	1	0	1	1	7	2
nec	FBgn0002930	7846	7528	7348	8184	8471	7664	7717	5488	7243	8523	9551	8597	6676	8765	5940	6547	7632	8465	5835	7882	9847	8022	6524	7764	6304	7361	5139	9250	8426	5605
net	FBgn0002931	176	186	174	142	228	223	236	261	142	237	241	227	142	547	174	371	200	410	196	368	246	389	192	366	154	153	153	286	184	231
neur	FBgn0002932	210	253	188	222	247	208	291	244	224	273	357	283	189	320	233	285	241	281	238	305	300	313	254	306	233	261	195	329	268	243
ng1	FBgn0002933	0	0	0	1	0	0	0	0	0	0	0	0	0	0	0	0	0	0	0	0	0	0	0	0	0	0	0	0	0	0
ninaA	FBgn0002936	0	0	0	0	0	0	0	0	0	0	0	0	0	0	0	0	0	0	0	0	0	0	0	0	0	0	0	0	0	0
ninaB	FBgn0002937	3016	2969	2438	2471	2824	2727	3596	2692	2696	3109	3285	3341	2184	3750	2283	3266	2544	3602	2107	3177	3533	3029	2476	3038	2727	2990	2082	3945	2929	2480
ninaC	FBgn0002938	111976	114235	99949	101889	126493	119660	129419	134489	96567	143070	143948	138752	83182	165684	90321	145383	115941	160822	77378	150372	144878	167154	117382	179765	103490	118728	75961	158783	125407	110919
ninaD	FBgn0002939	734	609	435	445	571	504	314	243	287	373	402	404	600	703	404	479	284	401	485	634	1009	696	488	642	437	426	318	504	333	294
ninaE	FBgn0002940	769456	757338	743096	758758	847888	789675	932681	807975	781250	1034709	1062131	1016650	919303	1182751	754915	993524	1086143	1285304	659898	1094225	1146325	1073850	981921	1238033	696843	804118	574340	1407827	933137	641730
slou	FBgn0002941	72	83	59	88	88	85	112	88	78	118	94	81	79	131	70	113	84	133	52	128	108	125	80	110	55	69	44	68	98	61
nkd	FBgn0002945	775	801	784	767	911	954	997	896	827	1022	1057	1035	591	1160	730	1075	848	1214	647	1062	1022	1173	921	1163	698	946	629	1201	950	826
nod	FBgn0002948	229	203	130	142	131	116	187	122	124	179	172	153	134	208	133	190	154	280	140	196	242	201	161	170	185	165	131	221	175	97
nos	FBgn0002962	1	1	1	0	2	1	0	4	7	0	33	0	1	4	0	0	8	0	0	0	2	4	0	4	0	2	0	1	15	0
numb	FBgn0002973	1961	2072	2090	2109	2525	2400	2772	2686	2129	3100	2872	2791	1899	3328	2179	2903	2319	3336	1847	3569	2929	3228	2448	3654	2257	2348	1692	3127	2632	2307
odd	FBgn0002985	41	47	59	44	56	68	76	61	51	79	70	78	44	73	73	68	55	74	56	91	68	84	76	73	53	71	55	81	74	37
okr	FBgn0002989	159	134	121	152	161	155	178	136	145	246	167	223	175	237	144	199	167	214	131	276	233	254	159	220	158	184	99	207	211	162
opa	FBgn0003002	120	112	116	114	138	127	155	124	131	135	170	181	104	182	93	162	136	196	100	198	154	155	132	205	117	131	90	195	108	103
or	FBgn0003008	360	391	351	404	458	344	503	377	364	503	495	502	389	590	351	508	368	528	405	536	553	574	387	564	388	450	286	512	449	317
ord	FBgn0003009	0	0	0	0	0	0	1	0	0	1	0	0	0	0	0	0	0	0	1	0	0	0	0	0	0	1	0	0	0	1
ort	FBgn0003011	495	518	425	450	541	544	695	627	456	685	583	704	427	931	526	751	531	760	548	817	762	911	518	748	543	599	379	637	649	575
osk	FBgn0003015	25	2	1	0	11	4	0	22	46	3	134	2	3	7	2	17	11	13	8	1	4	12	1	23	5	18	6	6	65	6
osp	FBgn0003016	3146	3191	3021	3063	3224	3279	4157	3794	3027	4171	4123	4076	2258	4383	3080	3901	3071	4723	2598	4302	4647	4582	3560	4766	3416	3878	2218	4793	3846	3392
otu	FBgn0003023	173	230	981	1114	824	682	518	578	22	10	935	881	1276	2182	190	256	15	8	26	30	126	226	87	220	1272	1876	706	1524	1285	1196
ovo	FBgn0003028	575	631	570	522	667	707	789	655	572	761	809	704	372	836	484	737	531	916	543	838	838	827	627	911	628	663	528	893	717	635
SP	FBgn0003034	0	0	1	0	1	0	0	3	0	0	0	0	0	0	0	0	0	0	1	1	0	0	0	0	0	0	0	0	0	0
pbl	FBgn0003041	447	442	452	470	491	461	550	505	429	518	659	519	407	667	431	499	439	608	461	611	602	547	428	566	512	504	318	590	568	434
Pc	FBgn0003042	552	610	531	538	745	655	786	726	589	807	760	732	477	974	585	748	676	875	597	871	827	907	702	921	576	688	419	821	722	655
Pcl	FBgn0003044	614	665	578	650	728	680	802	775	593	938	872	858	477	1016	513	777	675	862	513	1013	888	944	713	939	577	661	509	940	857	601
Pcp	FBgn0003046	17	18	17	15	16	17	12	13	15	27	22	23	34	23	13	16	18	22	15	19	26	19	17	25	10	15	19	16	15	12
pcx	FBgn0003048	1602	1543	1559	1355	1681	1735	1920	1732	1560	1907	2035	1736	1073	1884	1295	1707	1433	1804	1039	1735	2072	2059	1638	2053	1479	1832	1271	2022	1860	1370
peb	FBgn0003053	991	953	962	853	964	1057	1354	1330	980	1317	1257	1270	783	1531	961	1256	1097	1452	775	1244	1682	1537	1152	1525	1057	1239	819	1531	1194	961
CG10598	FBgn0003057	0	0	0	0	0	1	0	0	0	0	0	0	0	0	0	0	0	1	0	1	0	0	1	0	0	0	0	0	2	0
CG9757	FBgn0003060	131	90	71	47	96	67	131	60	66	67	87	79	112	75	163	104	102	201	98	123	203	115	47	33	52	53	41	84	79	29
Fib	FBgn0003062	755	681	809	783	811	867	869	667	875	951	856	981	501	772	667	882	793	1155	498	950	1213	1441	1136	1131	933	1029	528	1236	832	502
CG2150	FBgn0003065	0	2	0	2	1	4	3	2	1	0	1	1	2	1	0	0	3	3	0	1	1	1	1	2	5	0	0	0	2	2
Pepck	FBgn0003067	0	0	0	0	0	0	0	0	0	0	0	0	0	0	0	0	0	0	0	0	0	0	0	0	0	0	0	0	0	0
per	FBgn0003068	608	709	660	837	854	1102	825	741	682	899	1119	931	742	916	583	861	902	929	474	935	1015	898	682	1066	551	732	547	1053	860	573
Pfk	FBgn0003071	8168	8325	7661	8176	10457	9656	11521	10930	8572	12280	12240	11287	7753	14910	7229	12118	7539	12626	6268	13813	10575	12807	8024	12647	8130	9130	6814	12044	9881	8211
Pgi	FBgn0003074	14892	14716	10504	12308	14330	11628	16590	12376	14007	19731	20049	18283	10517	17166	8724	12871	9538	14962	9836	15952	15248	15895	11035	15605	10721	12246	10376	14212	13813	11267
Pgm	FBgn0003076	13802	13416	13235	13536	13824	12074	13266	8905	12521	15838	17576	14699	13542	11778	9630	9569	9258	10834	9978	11290	14060	11554	9630	10416	10784	12745	8857	11411	12760	9130
Raf	FBgn0003079	1013	1026	967	973	1183	1089	1246	1151	948	1260	1330	1273	887	1606	910	1210	1102	1489	784	1410	1371	1561	1053	1470	871	1078	724	1369	1180	936
phr	FBgn0003082	87	110	127	147	87	77	300	226	181	259	141	121	95	106	442	493	65	93	273	334	142	136	102	111	93	125	118	290	129	89
Pig1	FBgn0003086	1	0	0	0	1	0	0	0	1	0	1	1	1	0	0	1	1	0	0	0	0	3	0	0	0	0	0	3	2	0
pim	FBgn0003087	7	4	1	4	7	5	12	7	6	8	17	5	10	11	6	6	14	5	12	10	10	8	4	9	5	6	7	6	23	9
pip	FBgn0003089	14	12	11	10	6	10	10	19	17	23	16	15	6	38	4	21	13	54	5	29	11	16	13	40	16	8	4	19	11	16
pk	FBgn0003090	451	454	502	515	654	694	554	479	455	592	591	581	341	642	432	613	475	805	338	698	655	661	483	710	408	520	376	763	545	385
Pkc53E	FBgn0003091	4965	3896	4176	3627	4524	4410	6541	5768	4749	6141	5482	5486	3026	7188	4802	5718	4314	5567	5102	6842	7215	6185	6067	7180	5213	4702	3525	5377	5189	5390
Pkc98E	FBgn0003093	4846	4856	4458	4912	5663	5720	6128	6173	4530	6139	6469	6025	3075	7080	4598	6262	4756	6448	3922	7145	6800	7188	5589	7608	5063	5051	3680	6328	6317	5337
plu	FBgn0003114	2	0	0	0	0	0	0	0	0	0	7	0	1	1	0	1	2	0	1	0	0	0	0	1	2	0	1	0	6	1
pn	FBgn0003116	617	590	635	659	726	620	670	605	600	757	855	768	660	791	600	695	558	717	526	622	835	697	645	819	697	730	457	811	777	558
pnr	FBgn0003117	121	132	147	178	165	141	138	102	128	148	186	197	116	165	121	132	124	184	113	163	192	187	135	199	165	186	107	219	167	131
pnt	FBgn0003118	1032	1081	833	943	1144	1105	1278	1136	892	1272	1238	1122	789	1570	880	1250	1012	1615	866	1481	1393	1468	1093	1430	919	1100	714	1485	1039	996
polo	FBgn0003124	8	5	4	2	19	3	3	7	23	3	130	7	4	13	6	10	16	10	7	5	10	13	6	9	5	17	5	5	105	9
Poxm	FBgn0003129	11	17	12	12	22	9	15	10	4	15	16	14	14	41	10	11	15	17	11	21	17	15	19	9	9	18	7	11	18	10
Poxn	FBgn0003130	26	42	26	32	51	26	38	41	40	41	35	36	22	48	25	28	32	43	20	61	38	38	43	38	22	22	32	27	38	34
Pp1-13C	FBgn0003132	3	1	0	2	0	3	7	4	1	0	3	4	1	2	4	2	1	0	1	3	3	4	3	7	7	4	4	4	2	3
Pp1alpha-96A	FBgn0003134	4766	4469	4586	4721	5737	4880	5214	4316	4591	5884	7267	6223	4053	6986	4528	5496	4978	6157	4643	6298	6485	5781	4629	6115	4659	5160	2967	6320	5763	4436
Ppn	FBgn0003137	19668	17762	20687	19278	24240	24793	24773	18552	17245	22158	23587	21027	13566	24636	13681	16540	11949	15752	13493	20354	25547	22648	19684	20999	16424	20111	15393	20181	20564	16798
PpV	FBgn0003139	758	775	762	757	817	771	977	751	776	980	1013	1012	678	1152	704	842	789	1046	662	1124	1085	1062	795	1172	768	855	585	1103	890	701
PpY-55A	FBgn0003140	0	0	0	0	0	0	0	0	0	0	0	0	0	0	0	0	0	0	0	0	0	0	1	0	0	0	0	0	0	0
pr	FBgn0003141	2050	2262	1848	2236	2226	2098	2439	1770	1808	2459	2742	2540	1396	2631	1439	2084	1652	2808	1577	2411	2201	2260	1929	2576	1727	2070	1479	2789	2120	1839
prd	FBgn0003145	0	3	0	2	1	2	3	0	1	0	1	2	1	0	1	0	1	2	2	2	1	2	2	0	1	0	1	0	0	1
Prm	FBgn0003149	9368	10262	9497	9763	11628	10904	13049	12989	10048	13636	12389	11747	5237	16110	9228	15181	7072	20546	7235	18460	12960	16133	7619	14559	9275	10711	7291	13104	11907	9840
CG2841	FBgn0003159	2409	2770	2659	2644	3454	3330	3812	3397	2850	3983	3927	3683	1824	3545	2410	3775	2464	3825	1904	3564	4012	4219	3143	4347	3090	3388	2342	4619	3459	3126
Pu	FBgn0003162	7430	8883	6766	7707	8822	7819	10145	9005	7122	10397	9623	9982	3912	13187	4947	11046	5502	14435	5262	13019	9397	12407	7179	11785	5990	6895	5738	10571	8134	8373
pum	FBgn0003165	5085	5012	4819	4570	6034	6198	6674	6931	5022	6942	6812	6555	3409	7624	4906	6727	4824	6824	3943	7130	6856	7393	6080	8188	5911	6038	4689	6523	5867	5947
put	FBgn0003169	1793	1868	1776	1916	2260	2045	2388	2197	1774	2300	2509	2287	1843	2681	2021	2359	2249	2926	1864	2859	2748	2526	2076	2727	1916	1992	1392	2808	2105	1920
pwn	FBgn0003174	284	255	311	449	645	452	419	368	262	454	360	387	196	415	347	658	235	365	284	609	368	387	326	666	161	221	187	362	283	200
px	FBgn0003175	3751	3388	3233	3229	3624	3833	4122	3479	3427	4100	3964	3645	2261	3875	2985	3567	3146	4291	2540	4187	4895	4273	3805	4292	3266	3495	2422	3974	3658	2982
qua	FBgn0003187	62	72	56	45	50	54	69	61	52	91	120	68	46	50	57	57	45	76	36	56	69	35	68	58	54	65	54	84	100	48
r	FBgn0003189	657	756	752	824	520	762	665	479	733	995	962	908	1691	721	1253	609	1532	887	777	626	1310	789	716	860	1081	1569	334	1089	843	698
ras	FBgn0003204	4388	4340	4301	4341	4898	4575	5163	4117	4038	5015	5389	5323	3174	5610	3378	4679	3719	5474	2938	5196	5987	6259	4358	5777	4114	4834	3258	5484	4627	3383
Ras85D	FBgn0003205	2002	2089	1821	1886	2271	2092	2238	2138	1809	2645	2641	2412	1689	2955	1885	2442	2130	2775	1822	2831	2675	2651	2016	2794	1901	2080	1392	2698	2427	2065
Ras64B	FBgn0003206	1086	1118	1090	1222	1240	1146	1435	1219	999	1484	1356	1537	1042	2029	1148	1700	1156	1874	1110	1841	1587	1747	1149	1644	1160	1262	857	1648	1276	1241
raw	FBgn0003209	2740	2918	2876	3008	3534	3334	3342	2931	2831	3418	4027	3496	2594	3688	3063	3750	3385	4447	2676	4093	4645	4031	3090	3851	3180	3441	2099	4567	3664	2801
rb	FBgn0003210	1989	2134	2085	2124	2371	2244	2536	2141	1998	2699	2895	2659	2004	2917	2078	2391	2375	3080	1868	2641	3155	2918	2223	2806	2234	2484	1531	3042	2437	2000
rdgB	FBgn0003218	9771	8321	8604	7445	9279	8866	13416	11271	9125	11730	10891	10993	6412	13898	8940	11039	8423	11445	8707	13016	13401	12823	10309	13310	9684	9434	7029	11351	9756	8995
rec	FBgn0003227	28	23	15	16	16	36	23	24	24	37	30	35	28	35	23	30	25	36	19	38	48	44	24	46	17	38	16	27	30	28
ref(2)P	FBgn0003231	6879	6672	6985	7473	8737	7947	8416	6841	6380	8848	9705	8495	6692	9526	7548	8981	8234	9946	6432	10240	10073	9711	7538	9701	7391	8558	4723	10727	9604	6505
Rh2	FBgn0003248	7115	7585	7838	7866	8406	7766	9570	7409	7467	10043	10274	9500	9080	10209	7570	9507	8863	11008	7074	10035	11166	10005	8523	10558	8173	8567	5938	13590	9315	6629
Rh3	FBgn0003249	25614	26056	22868	25501	26681	26204	29791	25091	22176	30893	34784	32190	33862	43509	23119	31403	34115	43848	20215	35494	37461	36258	31900	41541	20281	22673	16341	36842	24630	18110
Rh4	FBgn0003250	24524	24004	26146	26849	32026	30385	26633	23995	20260	27039	31342	29425	32500	32410	27853	34987	29074	34999	21085	31910	43522	39513	25310	33522	28423	31758	17490	44694	31161	21041
rib	FBgn0003254	17	22	12	23	31	31	30	28	25	25	35	39	19	31	23	29	20	30	25	35	30	29	26	32	14	18	21	38	21	21
rk	FBgn0003255	236	215	154	186	251	256	183	169	193	251	217	240	234	344	257	363	208	265	128	239	260	278	184	236	215	233	137	212	210	162
rl	FBgn0003256	1145	1156	1213	1161	1475	1358	1469	1413	1127	1579	1710	1502	1188	1750	1466	1616	1466	1849	1421	1736	1801	1676	1433	1857	1526	1473	953	1802	1624	1452
r-l	FBgn0003257	194	253	218	227	235	243	334	315	220	320	294	402	259	433	240	405	282	514	240	499	371	534	248	497	265	316	146	474	250	279
Rm62	FBgn0003261	17035	16183	16351	16870	19244	19183	21443	20670	16778	19844	20315	18869	15418	23997	18270	22344	19246	27218	13595	23975	24861	26251	20718	27583	19909	20950	12093	25467	19290	14789
ro	FBgn0003267	5	4	5	4	2	4	10	6	4	7	4	12	3	3	2	8	7	10	7	6	11	4	5	9	4	6	3	4	1	3
rod	FBgn0003268	162	163	154	139	147	167	174	159	150	201	224	184	121	242	150	173	167	196	103	160	211	222	195	267	173	190	114	196	194	169
amos	FBgn0003270	18	8	35	60	74	79	29	14	35	95	36	42	2	1	62	56	0	1	29	65	24	32	12	24	3	2	0	2	3	1
RpLP2	FBgn0003274	27160	21746	33369	28695	31009	29404	31681	24284	24762	32660	29198	33868	41937	30193	32986	31777	27061	33805	30144	30149	36534	31024	29251	32262	36622	40491	31216	34647	20077	13043
RpII18	FBgn0003275	340	391	437	387	416	394	445	352	365	500	504	507	489	580	327	474	376	541	331	488	567	542	442	538	372	484	342	538	411	309
RpII215	FBgn0003277	2437	2414	2189	2367	2783	2644	2864	2526	2133	3003	3178	2862	2140	3048	2287	2702	2668	3153	1910	2995	3487	3282	2712	3375	2427	2818	1803	3331	2796	1987
RpI135	FBgn0003278	309	275	290	334	315	287	385	333	298	379	385	360	217	390	310	361	358	432	263	393	468	512	381	470	336	366	195	394	345	294
RpL4	FBgn0003279	48847	46826	53616	54468	52592	51511	52904	39761	51878	60079	69898	65698	57041	55632	41835	54647	50911	68194	36079	60153	67891	64360	54983	60681	47508	60003	35534	73132	55530	33601
rst	FBgn0003285	367	339	326	319	387	352	378	336	306	420	484	469	246	549	284	418	368	569	267	464	410	500	364	522	315	383	254	426	339	385
rt	FBgn0003292	236	240	229	215	277	254	311	305	214	294	293	323	186	390	196	303	252	367	204	375	426	428	278	462	231	239	156	351	283	241
ru	FBgn0003295	108	102	86	95	121	149	130	140	94	126	145	147	129	198	139	215	154	184	111	169	139	168	106	193	107	96	97	157	160	108
run	FBgn0003300	109	92	84	115	135	111	177	121	94	117	113	130	96	159	90	131	83	151	83	167	152	149	107	164	89	128	87	181	108	81
rut	FBgn0003301	4891	4950	4937	4913	5619	6238	6767	7258	4775	6958	6329	6208	3454	7849	4513	6911	5260	7497	3575	7766	7164	8250	5738	8245	4699	5279	4309	6654	6020	5240
rux	FBgn0003302	242	254	224	237	271	290	318	265	227	305	299	259	235	442	222	322	260	367	190	364	386	337	261	396	222	242	197	354	326	223
ry	FBgn0003308	1844	1644	1820	1664	1869	1658	1576	1145	1681	1872	2388	1893	1420	1931	1343	1156	1283	1300	1195	1179	2251	1454	1660	1632	1448	1634	1441	1571	1785	1210
S	FBgn0003310	1341	1532	1345	1407	1576	1655	1894	1730	1387	1816	1847	1858	1114	2348	1356	1879	1656	2380	1272	2321	2045	2045	1578	2325	1478	1571	1020	2139	1789	1521
sad	FBgn0003312	12	8	15	6	7	8	8	10	5	14	11	16	13	11	12	13	21	33	8	19	21	12	14	15	17	29	5	12	12	11
sala	FBgn0003313	0	0	0	0	0	0	0	0	0	0	0	0	0	0	0	0	0	0	0	0	0	0	0	0	0	0	0	0	0	0
sax	FBgn0003317	1053	1061	1015	1138	1284	1196	1243	1230	1030	1400	1473	1348	1040	1695	1013	1361	1187	1625	989	1580	1607	1544	1134	1608	995	1169	798	1668	1312	1028
Sb	FBgn0003319	26	27	33	30	31	26	49	38	36	45	46	43	33	43	15	31	31	55	20	41	69	53	30	41	24	30	20	54	37	24
sbr	FBgn0003321	2342	2422	2403	2691	2852	2845	3080	2967	2388	3086	3352	2979	2243	3702	2655	3284	2718	3570	2415	3582	3877	3702	3208	3855	2783	2843	1849	3669	2959	2478
sca	FBgn0003326	437	379	377	367	429	517	503	527	403	584	509	511	271	721	344	537	390	508	337	693	517	645	496	729	338	389	312	463	506	454
scb	FBgn0003328	723	819	802	801	877	838	969	860	818	1052	1060	919	851	1077	1145	1025	1086	1234	800	1046	1347	952	820	1075	976	930	564	1135	879	843
Sce	FBgn0003330	494	519	434	504	521	493	639	505	362	606	627	564	508	704	461	639	548	655	391	710	703	740	453	650	431	477	367	660	586	395
Scm	FBgn0003334	1680	1693	1622	1610	2007	1935	2135	2016	1574	2080	2345	2147	1364	2634	1616	2121	1795	2406	1497	2414	2463	2600	1873	2599	1698	1756	1331	2513	2064	1659
Scr	FBgn0003339	418	502	419	478	523	496	572	600	451	584	628	525	412	733	397	630	539	878	388	654	590	612	424	786	471	543	356	779	514	493
sd	FBgn0003345	2341	2418	2333	2389	2888	2778	3078	3073	2381	3321	3321	3136	2001	3816	2449	3367	2770	3721	2290	3724	3728	3686	2836	3899	2795	2832	2029	3749	3320	2781
RanGAP	FBgn0003346	405	385	307	363	359	352	516	330	335	534	446	502	334	506	343	488	344	463	383	495	531	604	361	499	310	413	223	412	406	345
sei	FBgn0003353	1061	999	1003	1126	1222	1121	1449	1370	1030	1502	1403	1350	909	1652	1087	1436	1153	1601	1014	1676	1615	1602	1160	1678	1065	1075	787	1465	1336	1081
Jon99Cii	FBgn0003356	3	40	1	8	1	1	15	38	21	2	366	21	2	5	4	15	1	1	4	95	4	8	35	4	33	28	128	23	29	16
Jon99Ciii	FBgn0003357	3	57	2	20	2	1	12	65	32	0	712	36	1	7	3	22	1	7	6	133	3	23	73	5	67	62	278	40	64	37
Jon99Ci	FBgn0003358	3	5	5	2	1	3	2	4	4	2	62	2	1	5	4	7	1	4	1	7	4	6	2	5	6	4	38	2	3	1
sesB	FBgn0003360	69024	82509	67172	74420	78957	72481	102500	102000	68405	105030	90512	95725	57001	136190	58348	121836	56615	132698	54742	133307	87019	127770	66616	121172	62664	71940	51106	97440	81134	79307
sev	FBgn0003366	3235	3444	3598	3632	4034	4003	4335	3531	3397	4571	4480	4272	3368	4044	3339	3524	4168	4620	2610	3932	4864	4058	3441	4319	3322	4053	2733	5181	4021	2690
sgg	FBgn0003371	10999	10849	10964	10798	14703	13776	14899	14121	11910	16245	16931	15978	8042	16726	11242	14906	11856	14723	9758	16491	16848	17260	13819	18210	11768	12349	8697	15250	13167	11261
Sgs1	FBgn0003372	23	12	17	13	18	15	16	37	13	17	13	13	13	64	30	58	12	23	10	33	24	34	21	35	35	37	13	33	28	21
Sgs3	FBgn0003373	0	0	0	0	0	1	0	0	0	0	0	0	0	1	0	0	0	0	0	0	0	0	0	0	1	0	0	0	1	1
Sgs4	FBgn0003374	1	1	1	1	1	0	2	0	4	1	0	1	1	0	1	0	0	0	2	1	2	1	0	0	1	0	0	1	0	3
Sgs5	FBgn0003375	0	0	0	0	0	2	0	0	0	0	0	0	0	0	0	0	0	1	0	0	1	0	0	0	0	0	0	1	3	0
Sgs7	FBgn0003377	0	0	0	0	0	0	0	0	0	0	0	0	1	1	0	1	0	0	0	0	0	0	1	0	0	0	1	0	0	0
Sgs8	FBgn0003378	0	0	0	0	2	2	0	0	0	0	0	0	0	0	1	0	0	0	0	1	1	0	0	0	0	0	0	0	0	0
Sh	FBgn0003380	10998	8759	9837	9045	10841	12363	15099	17527	9471	13594	11060	11118	5043	16486	10248	14935	7173	12827	8724	17783	12709	15599	13495	17274	11368	10690	9200	11403	11464	12218
sha	FBgn0003382	3	4	3	4	4	6	4	4	8	4	9	8	1	3	3	11	11	4	2	8	11	5	4	7	12	4	3	11	6	9
Shaw	FBgn0003386	1737	1670	1632	1643	2170	2140	2121	2316	1720	2455	2206	2274	1124	2730	1783	2485	1853	2482	1618	2846	2439	2633	2056	2648	1905	1710	1499	2131	2230	2039
shd	FBgn0003388	74	89	63	57	78	96	85	86	67	53	76	66	88	124	131	114	101	195	68	133	164	131	127	164	111	87	48	216	104	123
shf	FBgn0003390	682	694	1065	1356	1135	1236	903	612	683	996	1300	1097	1657	1119	1059	861	1721	1565	1085	1222	1345	1011	831	972	1165	1680	552	1899	1438	727
shg	FBgn0003391	3034	3218	3320	3323	4020	3904	3496	3289	3204	4424	4489	4155	2742	4739	2917	3890	3510	4743	2195	3583	4522	4375	3265	4289	2637	2972	2385	4408	3740	3192
shi	FBgn0003392	15494	15066	13671	13357	17736	17110	19800	20196	14205	20744	20140	19767	10487	23720	14479	20392	15349	19650	13262	23188	21348	23925	16844	24613	15954	15746	12029	18788	19046	17630
shn	FBgn0003396	2630	2525	2490	2143	2831	2924	3382	2980	2603	3344	3434	3093	1726	3398	2339	2929	2718	3842	2120	3351	3829	3636	2982	3487	2616	2945	1951	3811	2802	2338
shu	FBgn0003401	9	6	8	5	14	11	14	7	11	13	12	11	7	17	4	8	6	12	6	9	13	11	7	8	1	6	10	5	4	3
sina	FBgn0003410	1229	1159	1172	1264	1371	1348	1562	1407	1090	1432	1571	1452	977	1778	1147	1508	1268	1673	1091	1748	1677	1830	1405	1887	1214	1312	937	1794	1441	1184
sisA	FBgn0003411	9	9	4	3	4	1	5	1	1	0	4	2	0	1	1	1	2	3	1	2	5	6	3	2	0	0	1	0	4	2
skd	FBgn0003415	3468	3374	3477	3357	3863	4324	4405	4547	3324	4592	4654	4110	2253	4622	2902	4023	3689	4591	2451	4323	4847	4761	4011	5115	3502	3600	2888	4821	4122	3605
sl	FBgn0003416	612	613	570	543	673	652	756	554	594	758	857	735	507	900	663	729	619	865	550	810	936	919	668	848	690	740	461	835	762	690
slgA	FBgn0003423	8839	8874	8568	8913	10958	10275	12273	11629	8850	12504	12295	12089	7490	15212	8722	12922	8703	12918	7890	14280	12928	14234	10032	15129	8875	9390	7388	12184	11016	10100
slo	FBgn0003429	8890	8212	7753	7487	8425	9805	10530	11416	8938	12038	10716	9901	4819	11869	7964	10840	9022	12431	7172	11829	10393	11351	11126	13118	8705	8496	8281	11554	10269	9425
slp1	FBgn0003430	296	304	302	347	354	359	400	381	303	432	419	400	301	469	316	405	379	521	287	493	446	460	339	546	317	294	240	448	371	321
sm	FBgn0003435	6292	6512	6398	6166	7906	8612	8380	9017	6258	8869	8907	7990	4017	9959	6576	9350	6136	8738	5249	9371	8533	9570	8025	10446	7634	7202	5940	8308	8461	8563
smo	FBgn0003444	373	370	382	400	382	370	373	374	286	386	503	409	336	492	382	490	464	586	359	485	427	396	381	408	365	373	255	559	478	378
sn	FBgn0003447	4603	4650	4756	4615	5354	5189	6361	4504	3921	4928	6314	6205	3746	5893	4528	5044	4036	5436	4029	5350	6305	5755	4695	5644	5455	5864	3421	6698	5319	4620
sna	FBgn0003448	0	0	0	0	2	4	1	1	0	2	0	1	0	0	1	0	0	1	2	0	0	1	0	2	1	2	0	1	0	0
snf	FBgn0003449	821	876	847	848	981	862	1048	778	848	1103	1125	1107	909	1353	752	1065	886	1358	790	1220	1235	1138	901	1117	788	928	580	1215	1037	733
snk	FBgn0003450	0	2	2	3	1	2	5	1	2	1	9	5	2	2	2	4	3	8	2	1	0	0	6	3	1	1	1	3	6	0
stwl	FBgn0003459	353	371	322	328	417	411	392	359	325	473	506	454	316	491	360	409	436	538	287	411	520	452	448	506	397	442	275	582	470	367
so	FBgn0003460	771	732	705	719	823	829	1004	925	732	975	1017	974	786	1245	689	965	814	1283	586	1038	1104	1032	898	1129	790	842	603	1277	833	685
Sod	FBgn0003462	11775	11675	13825	13692	13491	12236	13709	9528	11625	14864	15556	15011	14478	15129	9840	12014	10508	14739	9893	14060	15583	13398	11354	13821	10356	12418	9686	14919	13340	8326
sog	FBgn0003463	3337	3559	3129	3151	3762	3788	4721	3888	3357	4354	4297	4375	2071	4327	2895	4440	3161	5052	2509	4836	4728	4792	3490	4647	3148	3608	2668	5206	4003	3313
sol	FBgn0003464	3419	3141	3148	3183	3699	3548	4335	3835	3176	4290	4121	4326	3206	4974	2974	4101	3841	4544	2631	4932	4975	5178	3731	5145	3050	3566	2507	4827	3908	2699
spir	FBgn0003475	6994	6991	6481	6809	7745	7912	9170	8283	6362	8640	9145	8848	5555	10160	6477	8790	7553	10446	5877	10129	9546	9530	7409	10456	6686	7421	4829	9698	7729	6547
spn-A	FBgn0003479	188	190	146	171	187	137	218	183	154	223	196	232	233	303	158	225	188	258	122	231	210	269	149	259	174	256	114	222	237	167
spn-B	FBgn0003480	24	35	53	62	57	49	55	55	61	84	100	77	44	86	35	53	56	53	42	71	76	77	53	80	55	64	45	70	68	41
spn-D	FBgn0003482	2	6	3	3	1	7	2	1	2	4	4	4	8	8	8	4	0	4	3	2	12	10	10	16	13	15	3	16	9	3
spn-E	FBgn0003483	73	75	82	81	61	78	100	95	80	92	125	100	58	82	75	99	71	105	51	113	91	117	80	95	102	94	58	160	87	75
spo	FBgn0003486	0	2	2	2	1	1	2	3	2	0	0	0	1	1	1	1	1	3	0	1	0	0	0	2	3	3	0	2	2	1
spz	FBgn0003495	1361	1622	1431	1552	1742	1509	1741	1411	1248	1841	2000	1773	1205	2090	1241	1448	1607	2239	1341	1779	2104	1757	1418	1902	1381	1509	1103	2140	1831	1425
sr	FBgn0003499	1310	1158	1174	966	1284	1256	1206	1259	1164	1161	1122	1095	621	1426	1188	1526	987	1689	813	1384	1826	1691	1477	2021	934	1015	786	1450	1164	1301
Btk29A	FBgn0003502	1544	1471	1402	1514	1818	1595	1644	1431	1401	1702	2163	1896	1159	1946	1405	1508	1516	1801	1377	1772	2003	1832	1538	1805	1564	1581	1150	2016	1839	1296
srp	FBgn0003507	2606	2176	2211	2021	2429	2375	2325	1539	2542	2841	3259	3120	1759	2396	1955	1733	2008	2138	1744	2041	2920	2449	2354	2470	2533	3197	1680	2993	2439	1761
Sry-alpha	FBgn0003510	0	0	0	0	0	0	0	0	0	0	0	0	0	0	0	0	0	0	0	0	0	0	0	0	0	0	0	0	0	0
Sry-beta	FBgn0003511	0	0	0	0	0	0	0	0	0	0	0	0	0	0	0	0	0	0	0	0	0	0	0	0	0	0	0	0	0	0
Sry-delta	FBgn0003512	377	330	343	373	408	382	521	372	361	542	535	531	462	648	372	503	411	474	423	613	631	618	414	552	366	469	263	513	450	313
ss	FBgn0003513	503	527	493	492	595	601	644	693	556	745	721	751	409	846	440	814	680	992	430	895	855	865	583	917	551	611	364	893	719	591
sqh	FBgn0003514	2410	2689	2568	2725	3105	2845	3069	2744	2375	3302	3488	3204	2802	3998	2554	3265	2843	4120	2231	3703	3750	3615	2741	3964	2537	2820	1887	3930	3332	2419
st	FBgn0003515	489	544	623	611	743	783	834	616	525	644	895	814	594	916	492	807	607	758	447	726	851	763	488	664	456	504	356	672	493	336
sta	FBgn0003517	42389	42229	46871	48964	47089	45794	47204	37289	44594	52835	60745	58950	51183	53834	35746	51580	45631	64469	32688	56883	58593	57912	48705	56407	45433	54967	32558	68801	52391	31819
stau	FBgn0003520	5448	5608	5099	5584	6434	6283	7358	6957	4775	7023	6108	6052	4276	8688	5136	7510	5464	8185	4413	8428	8366	9146	6386	8877	6206	7115	4655	9307	6911	6154
stg	FBgn0003525	41	35	42	63	58	50	65	47	76	73	159	66	29	79	42	48	45	56	48	84	70	63	40	76	46	57	33	53	113	60
stil	FBgn0003527	1	0	0	0	0	0	0	0	0	0	6	1	0	0	0	0	1	0	0	0	1	4	0	0	1	1	2	2	4	0
sub	FBgn0003545	0	0	0	1	4	4	2	0	7	3	23	2	0	5	1	0	2	1	0	2	1	2	0	4	1	2	0	0	22	2
Su(dx)	FBgn0003557	3039	2922	2755	2990	3381	3258	3767	3552	2966	4019	4308	3786	2645	4419	3075	3693	3346	4315	2662	4384	4430	4250	3408	4592	3127	3266	2263	4357	3783	3169
su(f)	FBgn0003559	815	880	817	860	900	876	908	817	724	1097	985	986	855	1327	862	1015	980	1268	736	1085	1197	1171	889	1166	804	972	572	1193	920	793
su(Hw)	FBgn0003567	780	773	751	812	862	820	961	796	732	1119	1060	1144	560	1149	700	1053	767	1189	772	1115	1158	1208	816	1110	721	895	525	1105	904	784
su(sable)	FBgn0003575	1523	1699	1635	1740	1606	1593	1815	1648	1429	2010	2036	1923	1179	2128	1303	1833	1745	2386	1117	1999	2149	2324	1587	2264	2419	2722	1153	2657	2746	2142
Su(var)3-7	FBgn0003598	831	762	765	869	953	938	1044	930	739	1142	1234	990	787	1279	761	1029	908	1172	699	1201	1111	1236	896	1185	834	908	619	1223	1061	744
Su(var)205	FBgn0003607	1613	1865	1619	1791	1874	1772	1813	1473	1399	2067	2158	2122	1775	2301	1622	1835	1707	2284	1545	2144	2373	2252	1818	2374	1720	1817	1130	2433	1941	1554
Su(var)2-10	FBgn0003612	1593	1611	1445	1696	1849	1855	1890	1880	1389	2121	2204	2091	1312	2362	1521	1959	1726	2095	1431	2314	2168	2202	1878	2346	1520	1661	1256	2237	1898	1508
su(w[a])	FBgn0003638	5059	4836	4516	4908	4860	5272	5882	6329	4709	6910	6608	6681	3584	7723	4503	6780	4828	6936	4080	7222	6433	6768	5977	7759	4653	5069	3903	7199	5664	4350
svp	FBgn0003651	2218	2019	2133	2049	2583	2370	2491	1980	2263	2767	2971	2925	2026	2875	2046	2317	2270	2716	1889	2691	3073	2956	2259	2748	2394	2976	1629	3031	2532	1716
sw	FBgn0003654	1278	1376	1293	1303	1411	1410	1677	1464	1205	1687	1700	1603	1386	1919	1228	1519	1487	1849	1160	1730	1897	1935	1366	1897	1260	1410	918	1817	1573	1209
swa	FBgn0003655	9	1	8	2	5	13	12	13	12	2	76	3	3	3	4	5	14	7	3	5	11	6	3	8	5	4	5	8	41	4
sws	FBgn0003656	5199	4974	4613	4875	5416	5326	6006	5108	4961	5852	6301	5617	3540	6199	4179	5240	4459	5662	3884	5788	7020	6290	5073	6203	4282	4916	3657	6135	5447	4261
Syb	FBgn0003660	2671	2799	2761	2975	3003	2630	3021	2378	2614	3223	3581	3350	2637	3609	2615	2946	2769	3409	2760	3463	3883	3282	2628	3114	2865	2891	1800	3665	3033	2612
T-cp1	FBgn0003676	1369	1263	1359	1477	1441	1343	1759	1420	1382	2037	1704	1940	1569	2123	1658	1813	1685	1994	1391	2121	2222	2352	1451	2154	1532	1877	930	1698	1590	1369
term	FBgn0003683	1	0	1	0	1	1	2	2	1	0	1	1	0	0	1	2	2	4	1	0	0	1	0	0	1	1	0	0	1	0
Tbp	FBgn0003687	264	267	271	255	297	256	312	270	245	388	380	367	271	422	263	320	293	364	244	410	348	361	319	410	258	277	205	422	345	214
thr	FBgn0003701	27	12	9	9	10	10	14	16	16	14	74	39	15	26	10	14	17	30	14	10	8	17	10	21	22	28	10	16	36	11
tipE	FBgn0003710	989	961	896	990	1229	1180	1337	1381	1004	1426	1337	1292	710	1760	937	1385	1007	1535	799	1668	1467	1597	1170	1629	1034	987	740	1368	1208	1128
tko	FBgn0003714	454	446	405	429	430	377	496	393	397	502	481	565	534	616	472	500	432	688	436	628	559	569	427	596	427	482	345	537	439	400
tkv	FBgn0003716	2124	2192	2163	2096	2568	2465	2594	2223	1985	2558	2859	2679	1787	2870	2150	2777	2339	3353	1941	2879	3542	3255	2150	3025	2171	2240	1534	3169	2818	2193
tld	FBgn0003719	56	65	56	58	40	52	90	87	88	119	87	87	88	149	66	79	137	160	78	115	90	90	129	128	61	57	99	116	87	77
tll	FBgn0003720	0	0	0	0	0	0	0	0	0	1	0	0	0	0	0	1	0	0	1	0	0	0	1	0	0	0	0	0	0	0
Tm1	FBgn0003721	9793	10614	9916	10263	10713	9975	13083	12445	9414	13665	12408	12620	8834	16348	9116	14274	8876	18171	8447	16656	12446	15093	9089	14987	9370	10652	7416	13350	11853	10326
Egfr	FBgn0003731	5416	4891	3650	3727	4211	3759	5267	3994	4853	6040	7354	6209	3466	5814	3215	3933	4087	5268	4074	5285	6852	5758	4467	5189	3696	4579	2537	4478	4748	3541
Top2	FBgn0003732	1439	1421	1321	1453	1670	1525	1642	1554	1353	1959	2082	1856	1022	1995	1239	1583	1497	1442	1134	1759	2006	1751	1547	1796	1282	1419	1036	1890	1793	1413
tor	FBgn0003733	3	6	9	6	4	8	12	2	6	6	33	5	19	2	34	6	22	7	26	7	12	6	8	7	18	18	4	6	18	11
tra	FBgn0003741	317	283	241	300	350	306	398	302	243	415	365	396	324	569	284	392	319	426	333	540	403	470	320	434	259	302	204	425	339	240
tra2	FBgn0003742	489	504	482	445	536	494	577	535	455	633	637	656	513	721	489	602	529	723	547	836	729	689	562	735	532	540	348	682	549	453
trc	FBgn0003744	2099	2154	1911	2015	2498	2177	2521	2356	1994	2801	2938	2812	1752	3283	2062	2758	2213	3010	1803	3119	2963	2943	2214	3210	2031	2200	1556	2940	2518	2047
Gr5a	FBgn0003747	1	1	4	3	1	1	3	7	1	1	2	1	4	2	2	2	6	5	1	3	2	3	2	2	1	2	3	6	4	3
Treh	FBgn0003748	16374	17282	15893	17222	17155	17703	14456	12787	14133	16873	18776	16832	13059	20028	14370	16379	16692	20766	10687	15804	22524	19032	14089	18488	15189	14594	9427	18563	16623	12859
trk	FBgn0003751	24	16	23	24	17	23	23	13	13	16	26	22	21	45	23	31	25	32	12	34	26	27	16	20	13	20	5	31	20	15
trp	FBgn0003861	81106	73733	76740	75675	83824	77172	98392	93152	76681	106101	97175	95782	67463	129781	74411	112347	71428	115450	61610	116562	118471	127978	84733	129397	72919	79711	58228	118711	79044	65955
trx	FBgn0003862	4432	4176	4370	3997	4720	5589	5360	5468	4200	5600	5764	4735	2961	5166	3785	5258	4709	6026	2836	5023	5914	5894	5192	6370	4489	4941	3639	6447	5317	4485
alphaTry	FBgn0003863	20	336	88	121	7	58	210	304	81	3	1910	261	5	10	3	391	15	26	310	1014	20	42	1646	37	192	402	1213	419	316	176
tsg	FBgn0003865	0	0	0	0	0	0	0	0	0	0	0	0	0	0	0	0	0	0	0	0	0	0	0	0	0	0	0	0	0	0
tsh	FBgn0003866	222	234	179	217	274	224	300	272	205	329	274	320	241	444	195	308	257	375	217	341	332	322	239	381	249	238	145	323	261	214
tsl	FBgn0003867	2035	1901	2325	2121	2323	1858	1866	1212	1751	1923	2754	2059	3030	1872	1852	1468	1890	1821	1606	1420	2754	1686	2117	1740	2290	2247	1812	2396	2490	1448
ttk	FBgn0003870	2361	2545	2259	2316	2858	2593	3129	2844	2258	3545	3705	3402	1957	3990	2225	3105	2777	3810	2235	3649	3290	3543	2632	3621	2522	2771	1857	3728	2959	2542
tub	FBgn0003882	1071	1181	1044	985	1173	1034	1259	937	1001	1424	1415	1479	1068	1569	1032	1296	1173	1572	1090	1591	1516	1555	1203	1475	1079	1165	730	1558	1192	1010
alphaTub84B	FBgn0003884	29130	31490	27261	30526	30419	27968	34906	29168	27015	37676	36075	36329	27435	43881	23099	34956	26071	41571	20799	39311	36875	38963	27277	42976	22412	26858	20917	34514	32071	24612
alphaTub84D	FBgn0003885	3710	3364	3369	3565	3909	3381	4969	4122	3694	4839	4451	4363	2297	5681	2912	4551	2699	5017	2773	5260	5021	5624	3760	5844	2971	3283	2609	4315	3989	3295
alphaTub85E	FBgn0003886	8	15	16	23	24	20	35	54	6	13	29	43	13	73	11	52	17	65	12	59	26	58	8	31	18	8	36	48	16	25
betaTub56D	FBgn0003887	14133	14578	13928	15477	15131	13854	17326	14572	14680	20312	18063	18144	11988	22585	11200	16553	11896	19049	11643	21052	19096	18878	13028	20496	10842	13014	9984	16459	15586	12283
betaTub60D	FBgn0003888	1031	1024	974	1066	1026	980	1450	1116	954	1350	1926	1558	1126	1788	941	904	958	1373	1068	1638	1333	1253	1101	1437	962	1088	778	1276	1052	906
betaTub85D	FBgn0003889	11	10	19	15	13	6	20	14	19	17	18	26	7	28	13	17	19	20	10	27	18	17	23	27	12	26	10	21	14	7
betaTub97EF	FBgn0003890	5685	5613	5579	6061	5732	5269	6766	5774	5304	7114	6744	6729	5525	8217	5007	6757	4746	7641	4644	7879	7706	7514	4960	7164	4872	5550	3400	6464	5994	4767
tud	FBgn0003891	13992	14768	13817	13035	15784	15104	18373	15550	13897	18256	19259	17765	10453	18333	13192	17128	14942	20750	12140	17368	21811	19895	16463	20114	14591	15560	10725	21479	15380	13693
ptc	FBgn0003892	277	299	257	277	323	292	370	321	281	339	366	380	200	479	246	363	322	444	237	427	457	390	283	411	243	278	209	442	317	242
tup	FBgn0003896	480	494	499	509	579	569	620	591	549	661	690	654	466	767	531	667	558	755	502	697	755	741	668	786	552	535	405	753	624	549
twi	FBgn0003900	10	15	8	4	17	14	17	16	16	13	14	12	9	17	12	12	14	23	11	19	19	19	13	14	13	17	10	26	12	8
snRNA:U1:21D	FBgn0003916	0	0	0	0	0	0	0	0	0	0	0	0	0	0	0	0	0	0	0	0	0	0	0	0	0	0	0	0	0	0
snRNA:U2:14B	FBgn0003920	0	0	0	0	0	0	0	0	0	0	0	1	1	0	0	0	0	0	0	0	0	0	0	0	0	0	0	0	0	0
snRNA:U2:38ABa	FBgn0003922	0	0	0	0	0	0	0	0	0	0	0	0	0	0	0	0	0	0	0	0	0	0	0	0	0	0	0	0	0	0
snRNA:U2:38ABb	FBgn0003923	0	0	0	0	0	0	0	1	0	1	0	1	0	1	0	0	0	0	0	0	0	0	0	0	0	0	0	0	0	0
snRNA:U3:22A	FBgn0003926	0	0	0	0	0	0	0	0	0	0	0	0	0	0	0	0	0	0	0	0	0	0	0	0	0	0	0	0	0	0
snRNA:U4:39B	FBgn0003930	7	2	5	5	3	5	8	10	2	2	7	3	4	10	4	8	4	1	2	8	11	4	5	10	4	4	6	4	5	8
snRNA:U4:38AB	FBgn0003931	1	0	0	0	0	0	0	0	0	0	0	0	1	0	0	0	0	1	0	0	0	1	1	1	0	0	0	0	1	0
snRNA:U5:14B	FBgn0003933	0	0	0	0	0	0	0	0	0	0	0	0	0	0	0	1	0	0	0	0	0	0	0	0	0	0	0	0	0	0
snRNA:U5:23D	FBgn0003934	0	1	0	1	0	0	0	1	0	0	1	0	1	0	0	1	0	0	0	0	1	3	0	3	0	0	0	1	0	0
snRNA:U5:34A	FBgn0003935	2	2	1	9	4	3	1	2	7	3	6	2	2	4	0	0	1	3	2	1	1	1	3	2	3	1	2	1	2	4
snRNA:U5:35D	FBgn0003936	0	0	0	0	0	0	0	0	0	0	0	0	0	0	0	0	0	0	0	0	0	0	0	0	0	0	0	0	0	0
snRNA:U5:63BC	FBgn0003938	0	0	0	0	1	0	1	0	0	2	0	0	6	1	0	0	0	0	0	0	1	1	0	0	0	0	0	1	0	1
RpL40	FBgn0003941	22885	23122	25076	25357	26106	23752	25149	20343	23433	28969	31566	29322	26646	28915	20102	27952	23536	33223	19270	29426	33017	30909	26486	30717	24074	29418	18392	36843	27196	17858
RpS27A	FBgn0003942	25020	24978	28805	29529	29467	26431	26942	22353	26471	32233	38167	35599	25646	29681	23938	29559	26072	36139	22998	30942	34540	31535	28089	30524	28218	32868	17652	38487	29311	20928
Ubi-p63E	FBgn0003943	7066	6666	7392	6327	8248	6604	8328	7115	5557	7520	8284	7812	4846	8761	6305	7462	6058	7294	6276	9405	8616	7912	7317	9204	5705	6180	3528	6610	7129	6033
Ubx	FBgn0003944	7	1	4	7	3	4	5	10	13	10	13	2	8	6	7	4	6	9	7	4	3	8	14	9	8	2	10	9	3	5
unc	FBgn0003950	6	7	2	4	9	11	6	11	4	6	5	9	4	15	6	17	7	16	4	20	9	7	7	18	10	5	5	10	10	9
Uro	FBgn0003961	0	0	0	0	0	0	1	1	0	0	63	0	1	1	0	4	0	3	0	0	0	3	0	1	1	1	35	23	3	0
ush	FBgn0003963	508	441	421	488	551	527	571	505	463	532	643	667	385	714	471	573	477	663	407	646	672	618	491	633	477	551	350	746	618	447
usp	FBgn0003964	1531	1581	1487	1604	1810	1712	1917	1648	1457	2015	2095	2046	1534	2339	1480	1928	1647	2145	1298	2247	2227	2244	1632	2410	1540	1834	1183	2351	1923	1501
v	FBgn0003965	1772	1792	2009	1827	1872	1769	1850	1100	1779	2042	1990	1895	2108	2146	1525	1144	1664	1686	1767	1451	2811	1666	1549	1271	1446	1444	1249	1365	1379	1184
vap	FBgn0003969	1226	1290	1208	1214	1433	1433	1692	1574	1257	1706	1801	1689	1064	2015	1422	1701	1506	1958	1266	1912	1993	1903	1438	2001	1370	1422	1014	1918	1563	1386
vg	FBgn0003975	65	53	54	63	94	78	86	78	71	75	72	86	48	103	73	65	67	63	48	83	78	92	63	114	68	66	46	86	72	68
vir	FBgn0003977	850	824	783	863	928	913	1029	800	736	1078	1103	1011	732	1048	766	897	855	1017	550	1030	1157	1135	839	1068	743	902	653	1084	973	704
vls	FBgn0003978	209	225	191	215	187	193	259	205	216	275	234	268	233	303	176	257	239	291	157	298	282	346	222	305	189	244	144	281	247	165
Vm26Aa	FBgn0003979	80	1	0	0	7	4	0	10	80	1	16	3	0	17	0	14	0	5	7	0	5	10	0	13	3	13	3	5	30	3
Vm26Ab	FBgn0003980	22	3	2	1	2	0	1	7	45	1	9	1	1	12	6	12	0	1	6	2	3	4	1	6	3	10	4	4	10	0
Vm34Ca	FBgn0003983	59	1	1	0	3	1	1	6	45	1	13	4	0	7	2	6	0	3	6	1	1	2	2	7	1	13	0	3	33	1
vn	FBgn0003984	625	696	564	582	630	627	883	765	715	867	866	885	385	896	549	744	592	829	500	880	881	854	720	916	594	624	453	864	705	667
w	FBgn0003996	629	731	659	697	762	703	776	571	423	756	682	741	672	1153	479	821	737	1201	455	959	795	1053	528	973	694	920	410	889	797	670
hid	FBgn0003997	329	378	324	339	454	447	456	369	345	403	511	496	430	628	414	568	581	721	331	542	477	612	409	634	453	537	271	672	540	483
wbl	FBgn0004003	123	136	90	88	95	94	87	75	83	122	93	99	132	192	78	107	96	171	63	110	129	133	76	132	146	193	63	185	109	103
wg	FBgn0004009	131	122	92	113	134	128	223	128	102	157	192	178	122	208	141	165	127	184	104	188	199	182	144	171	109	168	90	214	166	142
y	FBgn0004034	39	36	25	28	35	36	28	20	15	23	13	14	14	28	14	31	21	32	16	27	61	61	17	22	41	57	25	34	40	37
Yp1	FBgn0004045	491895	407825	417313	413063	495643	421657	415558	162003	432361	358310	644228	514313	177854	263595	188486	153682	160671	164780	251683	159944	531037	252102	393706	243533	270728	290755	267472	414087	446692	206465
Yp3	FBgn0004047	1037237	845747	847121	799520	920187	790249	844673	265021	952232	771761	1293047	987756	498473	377586	420412	187160	301364	224786	548885	243209	928711	294237	706559	309047	523929	548441	622775	675152	907824	372887
yrt	FBgn0004049	1251	1214	1086	1194	1420	1308	1559	1358	1036	1508	1644	1535	849	1727	1080	1502	1295	1797	1059	1687	1734	1688	1342	1706	1135	1249	838	1747	1484	1199
z	FBgn0004050	946	970	1003	1121	1151	1065	1178	1156	985	1288	1421	1290	1059	1533	1038	1209	1195	1492	873	1387	1388	1391	1110	1441	924	988	757	1506	1266	897
Z600	FBgn0004052	0	0	0	1	0	0	0	0	0	0	0	1	0	0	0	0	0	0	0	0	0	0	0	0	1	0	0	1	0	1
zen	FBgn0004053	0	0	0	0	0	0	0	1	0	0	0	0	0	0	0	0	0	0	0	2	0	0	0	0	0	0	0	0	0	0
zen2	FBgn0004054	0	2	0	1	0	0	2	1	0	0	2	1	0	1	1	0	0	3	0	0	0	1	0	0	0	0	0	0	0	0
uzip	FBgn0004055	5240	5658	4948	5172	6427	5802	6492	5929	4704	6517	6888	6349	3744	7526	4844	6550	5468	7848	4499	7663	7203	7256	5759	7713	5454	5576	3807	7759	6238	5868
Zw	FBgn0004057	1480	1424	1339	1527	1843	1568	1687	1569	1510	1897	2309	2018	1168	2153	949	1555	1179	1660	997	1894	1646	1754	1223	1627	1210	1422	1162	1928	1803	1158
Prosalpha4	FBgn0004066	1584	1594	1287	1501	1644	1400	1708	1328	1497	1831	1816	1726	1284	1988	1130	1654	1348	1934	1197	1825	1837	1790	1368	1883	1114	1399	1071	1817	1601	1234
Dhfr	FBgn0004087	301	342	320	308	340	280	341	224	252	387	313	348	372	355	302	327	262	365	306	370	432	389	299	332	295	371	203	396	293	255
bs	FBgn0004101	360	398	334	370	440	411	446	387	354	463	518	477	281	593	320	487	385	562	305	508	524	524	369	535	346	428	288	620	382	335
oc	FBgn0004102	710	855	809	844	1138	1139	1305	1339	1437	1774	1300	1259	611	1111	1061	1415	1659	2197	1127	1706	1438	1410	1821	2454	868	895	673	1263	992	925
Pp1-87B	FBgn0004103	6871	7282	6885	7249	8440	7714	8772	7444	6840	9061	9641	9284	6647	10483	7321	9153	8184	10442	6786	10124	10502	10132	7904	10612	7255	8246	5174	10402	8405	6989
Cdk1	FBgn0004106	11	8	10	15	11	14	13	8	27	17	48	21	8	26	12	21	11	24	12	17	19	18	13	20	14	17	8	25	37	9
Cdk2	FBgn0004107	120	131	89	112	158	131	150	133	104	165	134	144	94	186	94	163	141	174	114	172	148	169	109	195	128	131	109	173	157	143
Nrt	FBgn0004108	1389	1363	1238	1230	1520	1495	1882	1677	1362	1615	1722	1794	1252	2093	1359	1891	1610	2034	1127	1848	1841	1885	1371	2192	1232	1450	997	1885	1638	1526
tin	FBgn0004110	1	1	4	7	5	0	1	0	0	3	7	3	2	3	1	2	2	1	1	3	2	0	2	0	2	0	2	3	0	1
Tm2	FBgn0004117	7746	9093	7729	8381	8822	8374	10690	10103	7902	11335	10137	10050	5969	13194	7529	11606	6657	14954	6653	14590	10086	11989	6791	12196	7514	8425	6069	11044	9656	8399
nAChRbeta2	FBgn0004118	1189	1058	1059	1098	1311	1331	1456	1509	999	1475	1476	1261	1064	1616	1195	1514	1211	1578	1097	1552	1638	1550	1297	1715	1162	1037	944	1468	1461	1162
boca	FBgn0004132	625	644	623	716	753	645	704	507	571	877	797	869	633	913	488	745	510	817	512	808	886	814	618	841	463	572	458	756	610	456
blow	FBgn0004133	901	914	991	1002	984	997	1285	964	914	1066	1260	1270	892	1416	890	1277	972	1508	853	1352	1463	1381	960	1405	906	987	713	1398	1070	745
nullo	FBgn0004143	3	1	0	1	0	1	1	0	1	1	0	0	0	1	0	1	0	0	0	0	0	0	0	0	0	1	0	1	0	1
kst	FBgn0004167	11127	10320	9916	9005	10443	11081	14381	12024	10321	14037	12637	11922	6519	13943	8419	11684	9952	14066	7181	11778	14699	13770	11612	14232	9363	11124	8365	14317	10913	9925
5-HT1A	FBgn0004168	982	916	875	1021	1095	1201	1331	1341	942	1336	1231	1253	541	1605	951	1297	975	1265	778	1618	1428	1617	1110	1658	891	955	764	1141	1211	989
up	FBgn0004169	11071	13083	11136	12732	12911	12336	15460	15454	10712	16191	14795	14791	7367	20597	9980	19102	8459	23512	9211	23568	14584	19318	9987	18848	10227	11560	8008	16244	13363	12176
sc	FBgn0004170	0	0	0	0	0	0	1	0	0	1	0	1	0	0	0	0	0	0	0	2	1	0	0	0	0	0	0	0	1	0
Mst98Cb	FBgn0004171	1	0	0	0	1	1	2	0	1	0	0	1	0	0	0	0	1	0	0	2	1	1	1	0	0	0	2	3	1	0
Mst84Da	FBgn0004172	0	0	0	0	0	0	0	0	0	0	0	0	0	0	0	0	0	0	0	0	0	0	0	0	0	0	0	0	0	0
Mst84Db	FBgn0004173	0	0	0	0	0	0	0	0	0	0	0	0	0	0	0	0	0	0	0	0	0	0	0	0	0	0	0	0	0	0
Mst84Dc	FBgn0004174	0	0	0	0	0	0	0	0	0	0	0	0	0	0	0	0	0	0	0	0	0	0	0	0	0	0	0	0	0	0
Mst84Dd	FBgn0004175	0	0	0	0	0	0	0	0	0	0	0	0	0	0	0	0	0	0	0	0	0	0	0	0	0	0	0	0	0	4
mts	FBgn0004177	8034	7991	7614	8194	9048	8047	9651	8159	7406	10156	10799	10323	6761	11504	7898	9682	8181	11045	7822	10988	11467	11251	8894	11435	8372	8875	5721	10929	10144	8331
Csp	FBgn0004179	6211	6482	5772	6094	7461	6820	7921	7730	6155	8701	8549	8372	4940	10444	6572	8834	6630	9469	6084	9860	8878	9627	7028	10242	6945	6971	4816	8585	7678	7554
Ebp	FBgn0004181	2	0	0	0	0	0	0	0	0	0	0	0	0	0	1	0	0	0	0	0	0	1	1	0	0	0	0	0	0	0
snRNA:U1:82Eb	FBgn0004183	0	0	0	0	0	2	0	0	0	0	0	0	1	0	0	0	0	1	1	0	0	0	0	0	2	0	2	0	0	0
snRNA:U1:95Ca	FBgn0004185	0	0	1	0	0	1	0	0	1	0	1	2	0	3	0	0	0	0	0	0	1	0	0	1	0	1	0	0	0	2
snRNA:U1:95Cb	FBgn0004186	0	0	0	0	0	0	0	0	0	0	0	0	0	0	0	0	0	0	0	0	0	0	0	0	0	0	0	0	0	0
snRNA:U1:95Cc	FBgn0004187	1	0	0	0	0	0	0	0	1	0	0	0	0	0	0	0	0	0	0	0	0	0	0	0	0	0	0	0	0	0
snRNA:U6:96Aa	FBgn0004188	0	2	0	2	0	0	3	3	2	3	1	2	2	1	1	1	4	1	0	3	2	0	1	4	0	3	0	4	2	1
snRNA:U6:96Ab	FBgn0004189	1	2	1	0	0	0	0	0	0	1	1	1	1	0	1	0	2	0	0	0	0	2	0	2	0	1	1	0	2	2
snRNA:U6:96Ac	FBgn0004190	3	0	0	0	0	0	1	0	0	0	0	0	1	0	0	0	0	0	0	2	1	1	0	0	0	0	0	1	0	0
snRNA:U2:34ABa	FBgn0004191	1	2	1	1	0	0	1	0	1	2	2	0	2	1	0	0	0	1	0	1	0	0	1	0	1	1	2	1	2	0
snRNA:U2:34ABb	FBgn0004192	0	1	0	0	0	1	0	0	0	0	0	0	0	0	0	0	0	0	0	0	0	0	0	0	0	0	0	1	0	0
Ser	FBgn0004197	126	92	81	89	116	100	124	66	81	113	104	107	60	106	72	86	60	107	77	106	126	114	100	122	102	100	65	99	111	81
ct	FBgn0004198	3121	3011	2931	2882	3618	4093	3999	4118	2877	3971	4176	3793	1901	4458	2643	4006	3198	4056	2219	4356	4233	4471	3675	4806	3434	3427	2894	4437	4057	3379
nonA	FBgn0004227	3219	3118	2837	3092	3432	3388	3994	3764	3008	4232	4239	3905	2377	4684	3088	4051	3070	4271	2928	4700	4555	4572	3650	4864	3118	3246	2487	4085	3431	3275
mex1	FBgn0004228	1	2	0	2	5	4	5	6	4	2	14	8	4	0	5	3	3	1	4	13	3	1	14	4	3	5	13	2	10	16
Hrb87F	FBgn0004237	2461	2504	2244	2710	2962	2593	3051	2530	2364	3159	3461	3088	1935	3126	2348	2736	2480	3044	2171	2972	3585	3059	2557	2936	2316	2384	1834	3226	2574	2043
Dpt	FBgn0004240	112	41	749	809	1241	243	436	82	249	226	151	216	3692	814	2646	396	2710	2593	1228	3759	770	472	112	1081	2141	1159	475	35	2323	1250
Syt1	FBgn0004242	21195	20133	19215	19865	24690	25856	28303	31813	19899	29086	28325	26686	13638	33673	21958	31056	22010	32484	19640	35515	27633	32601	26274	35931	23962	22672	18002	26739	26026	26354
Rdl	FBgn0004244	4621	4501	4397	4191	5413	6622	5848	7436	4386	6841	5646	5531	2308	7544	4392	7005	4183	6415	3730	7686	5909	7492	6026	8105	5381	4947	4604	5303	6591	6186
T48	FBgn0004359	886	873	870	878	954	882	1075	867	827	1023	1155	1165	810	1165	795	1055	956	1374	697	1080	1401	1150	995	1316	910	940	596	1346	917	713
Wnt2	FBgn0004360	101	81	80	83	97	107	122	105	92	129	151	124	115	116	89	138	137	159	68	143	125	147	82	121	99	99	56	165	124	108
HmgD	FBgn0004362	1266	1273	1097	1312	1587	1445	1395	1328	1066	1567	2054	1568	1168	1570	1261	1413	1650	1866	1183	1504	1732	1436	1325	1614	1126	1084	902	2148	1657	1147
porin	FBgn0004363	27304	29734	26819	28596	30333	28465	33242	29244	24911	36801	34910	35510	23984	40603	22498	35843	24791	40091	21080	39286	35075	38770	26204	38485	23949	27508	20075	36447	31735	26356
18w	FBgn0004364	2231	2252	2041	2092	2237	2307	2657	1899	2087	2684	3001	2795	1532	2880	1752	2366	2033	2855	1628	2427	2837	2674	2228	2833	1957	2326	1674	2882	2707	2035
mei-41	FBgn0004367	206	210	166	164	169	173	225	197	188	279	226	238	188	292	195	199	190	191	154	256	245	257	207	259	151	218	118	212	184	151
Ptp4E	FBgn0004368	2188	2323	2336	2367	2554	2592	3091	3174	2268	3102	3254	2995	1868	3370	2099	3013	2658	3369	1967	3611	3284	3443	2850	3909	2239	2320	1853	3563	2675	2167
Ptp99A	FBgn0004369	3386	3299	3176	2978	3816	3859	4174	3999	3145	4455	4196	4010	2156	4509	2765	4219	3450	4762	2346	4731	4817	5191	3882	5232	3050	3510	2553	4590	4285	3311
Ptp10D	FBgn0004370	3007	3159	2868	2730	3262	3132	3759	3203	2800	3942	4012	3848	2014	4215	2397	3530	3028	4377	2281	4004	4187	4338	3042	4281	2938	3485	2380	4374	3555	3061
aly	FBgn0004372	0	0	0	1	0	0	0	0	0	1	0	0	0	0	0	0	0	4	0	0	0	0	0	0	0	1	1	0	1	0
fwd	FBgn0004373	4635	4675	4440	4372	5298	5331	5721	5411	4337	5872	6220	5824	3491	6458	4235	5579	4917	6526	3922	6032	6314	6441	5343	6883	4829	4991	3562	6685	5375	4719
neb	FBgn0004374	64	63	71	83	73	60	92	69	59	78	100	75	81	87	52	59	81	88	53	97	98	83	86	121	63	103	50	100	95	44
Klp61F	FBgn0004378	5	4	1	2	5	4	3	4	12	7	37	6	4	4	4	4	4	1	4	1	5	4	5	8	6	2	1	7	18	5
Klp67A	FBgn0004379	12	15	19	14	18	11	28	19	13	15	42	21	11	18	10	13	15	15	19	21	29	26	20	20	19	16	12	19	47	25
Klp64D	FBgn0004380	1625	1622	1429	1707	1843	1684	2133	1875	1510	2191	2121	2002	1373	2468	1458	2034	1635	2247	1431	2345	2204	2272	1668	2410	1523	1673	1132	2327	1900	1611
Klp68D	FBgn0004381	1671	1636	1506	1581	1809	1683	2025	1946	1476	2168	2115	2062	1537	2465	1521	2009	1807	2187	1406	2375	2363	2441	1648	2467	1435	1510	1157	2076	1764	1560
Klp98A	FBgn0004387	3024	3009	2896	2918	3278	3223	3505	3230	2848	3578	3741	3406	2209	3960	2804	3611	3218	4528	2356	4055	4047	4059	3340	4326	3046	3306	2069	4262	3496	2970
bnk	FBgn0004389	1	0	1	0	0	2	1	1	0	0	1	1	0	0	1	0	0	0	0	0	0	0	0	0	0	0	0	1	0	0
RasGAP1	FBgn0004390	1516	1540	1441	1472	1767	1786	1960	1748	1382	1757	1950	1832	1194	2164	1535	1881	1624	2173	1357	2375	2120	2236	1679	2323	1399	1564	1157	2181	1695	1459
shtd	FBgn0004391	382	455	417	347	428	383	505	385	387	650	474	651	422	646	456	517	506	633	379	583	603	700	439	653	382	585	265	487	445	332
pdm2	FBgn0004394	89	74	62	70	116	93	127	108	79	114	105	106	57	117	93	115	80	125	61	108	98	130	96	118	61	86	66	115	117	70
unk	FBgn0004395	1492	1371	1467	1326	1792	1790	1858	1913	1399	1968	1915	1764	1462	2142	1790	2007	1953	2409	1554	2356	2267	2343	1838	2339	1849	1746	1287	2280	1807	1633
CrebA	FBgn0004396	1339	1196	1048	1203	1468	1245	1561	1293	1374	1620	1688	1914	713	1690	1035	1261	1107	1332	1193	1465	1586	1459	1391	1540	1283	1421	1045	1489	1316	1272
Vinc	FBgn0004397	4985	6439	4769	6108	6189	6545	5928	6058	5193	7821	8159	7836	5205	8403	3991	6663	6523	8855	3180	7253	6847	8436	5687	9036	4657	5904	4378	8997	7131	5555
rhi	FBgn0004400	9	6	9	6	6	10	3	4	1	7	14	6	6	11	9	13	11	8	5	3	6	13	5	10	5	14	4	3	11	13
Pep	FBgn0004401	6334	5927	5937	6211	6740	6641	8216	7113	5854	8060	8308	7954	5565	9384	6159	7722	6277	8142	5223	8688	9387	8341	6572	8695	6084	6815	4338	8960	7083	5179
RpS14a	FBgn0004403	15290	14551	17261	17470	16569	15324	16602	12942	14752	18853	21186	19908	18322	18022	13653	17280	16455	22306	12661	19605	21291	19434	17243	19547	15660	18864	10760	22827	18116	11223
RpS14b	FBgn0004404	7904	7310	9652	9331	8790	8140	8989	6647	8067	9700	11000	10529	12346	9651	7855	9143	8945	11355	7124	10115	11567	10143	9014	10582	9090	10369	7541	12380	9757	5814
tam	FBgn0004406	138	172	176	192	179	132	194	161	157	229	209	220	226	218	231	169	239	183	194	232	260	263	147	207	199	251	108	223	212	134
DNApol-gamma35	FBgn0004407	0	0	0	0	0	0	0	0	0	0	0	0	0	0	0	0	0	0	0	0	0	0	0	0	0	0	0	0	0	0
msopa	FBgn0004414	0	1	0	0	0	0	0	0	1	0	1	0	0	0	2	0	0	0	2	0	0	0	0	0	0	0	0	0	0	1
me31B	FBgn0004419	2127	2181	2062	2366	2519	2277	2466	2254	2164	2855	3368	2901	2025	3153	2325	2602	2376	2893	2349	2794	3162	2794	2319	2945	2305	2269	1523	2956	2837	2245
LysB	FBgn0004425	1	24	6	4	0	2	8	4	13	8	82	5	2	1	1	15	1	1	11	73	9	5	29	4	6	10	54	3	24	4
LysC	FBgn0004426	1	22	0	0	0	0	7	10	11	1	135	11	0	1	1	20	0	0	14	98	0	3	71	4	7	13	104	6	9	1
LysD	FBgn0004427	11	127	60	32	4	5	34	28	29	104	585	37	1	7	6	95	2	7	92	405	67	22	237	8	52	100	244	16	101	36
LysE	FBgn0004428	1	16	0	3	1	4	12	8	4	43	97	9	0	0	3	18	1	1	9	62	2	4	24	5	4	9	10	1	2	1
LysP	FBgn0004429	37	43	98	24	54	18	204	12	41	235	190	87	49	15	83	36	12	17	85	166	254	10	197	4	211	270	8	12	356	240
LysS	FBgn0004430	1	3	1	1	2	7	4	4	2	8	3	3	0	3	3	6	2	3	2	3	1	5	2	3	2	5	2	1	3	0
LysX	FBgn0004431	2	2	9	8	3	15	7	13	4	1	6	2	3	0	27	7	0	4	5	4	0	5	18	1	0	4	7	6	10	1
Cyp1	FBgn0004432	17292	18250	17844	19354	21853	18930	20616	14755	17766	21503	22018	20781	15916	22318	15705	19059	14277	20375	15276	19429	22929	19117	17530	21234	15823	17754	13173	21747	18754	14824
Galphaq	FBgn0004435	4542	4881	4561	4802	5826	5311	6070	5663	4489	6348	6345	6209	4338	7476	5053	6925	5196	7478	4783	6961	6523	6903	5148	7267	5592	5479	3584	7113	5555	5801
Ubc6	FBgn0004436	3523	3651	3474	3631	4316	3858	4297	4158	3590	4680	4848	4455	3370	5959	3974	5189	4285	6182	3819	5564	5088	5614	3987	5709	4268	4351	2675	5261	4353	4039
Ten-m	FBgn0004449	7088	7003	6893	6608	8236	8800	9049	8775	6672	9229	9638	8631	4583	9845	5617	7718	5752	7876	4624	8889	9327	9711	7922	9619	6742	7086	6311	8675	8179	6750
mew	FBgn0004456	1080	1200	1095	1148	1259	1370	1323	1168	979	1209	1460	1250	847	1471	992	1210	983	1502	891	1315	1593	1492	1144	1486	1225	1225	866	1865	1323	1065
RpIII128	FBgn0004463	510	519	434	463	491	522	608	469	464	666	659	683	428	637	476	587	524	604	471	603	708	659	525	714	500	553	331	640	595	421
Su(P)	FBgn0004465	1068	1081	1002	1112	1010	921	1272	1147	982	1420	1282	1414	1234	1705	1033	1491	915	1220	960	1533	1381	1516	1103	1678	1070	1276	868	1548	1308	1126
GlyP	FBgn0004507	23343	26973	22978	27772	27956	26674	33613	27758	26955	42461	38005	38546	17214	41756	18034	34728	18690	35217	18097	37742	28366	34634	18921	31455	20007	24623	18146	28092	26589	25565
Fur1	FBgn0004509	3553	3813	3633	3912	4183	4343	4234	4122	3794	5180	4992	4682	3088	5280	3768	4445	4302	5826	3160	4806	4996	5069	3621	4997	4094	4509	2786	5321	4623	4061
Ets97D	FBgn0004510	236	251	243	230	285	280	316	287	184	318	349	310	259	386	221	310	271	392	232	354	331	383	290	345	234	262	168	348	297	203
dy	FBgn0004511	12	11	8	7	12	10	12	19	13	17	13	8	12	18	13	9	7	16	8	15	11	20	3	11	6	5	7	9	12	6
Mdr49	FBgn0004512	1845	1599	2012	2005	2351	2066	2389	1763	1613	1957	2000	2078	1558	2360	1576	1904	1759	2304	1453	2116	3071	2624	1623	1879	1806	1950	1273	2270	1809	1456
Mdr65	FBgn0004513	2423	2573	2186	2378	2541	2505	3033	2569	2190	3240	3116	3079	1905	4062	2147	3146	2528	3653	1957	3248	2993	2963	2396	3414	2229	2588	1648	3222	2881	2843
Oct-TyrR	FBgn0004514	369	385	318	377	410	423	442	495	358	496	419	448	332	620	374	558	408	552	330	596	491	512	398	571	400	349	268	495	429	422
Gad1	FBgn0004516	10630	10572	9350	10351	13345	12325	13142	14253	9106	14101	14187	13701	6808	17608	8681	14056	9659	13433	7844	16965	12810	16646	10739	16902	9585	9895	7781	12097	13737	12165
Akh	FBgn0004552	235	314	139	190	178	338	224	134	269	285	516	632	118	167	183	120	95	123	239	300	190	158	376	87	168	409	256	323	279	250
Edg91	FBgn0004554	4	22	7	24	14	9	23	16	8	20	23	24	10	22	7	20	6	30	19	15	46	24	15	23	6	13	14	20	11	22
Dbp73D	FBgn0004556	254	215	249	252	245	262	255	192	298	328	315	273	214	279	269	252	210	239	208	270	364	330	303	330	323	341	180	315	291	240
slp2	FBgn0004567	261	222	211	279	297	262	323	313	248	313	336	336	236	416	265	381	294	378	265	405	377	406	281	388	247	289	204	401	313	265
aos	FBgn0004569	711	761	650	650	699	629	892	797	616	795	814	817	647	1127	593	821	622	969	609	927	985	771	776	1088	737	826	474	1002	802	715
5-HT7	FBgn0004573	411	412	375	351	457	449	484	557	386	569	584	551	276	623	418	573	373	541	343	628	563	642	434	699	419	408	345	493	501	441
Rop	FBgn0004574	8692	8889	7943	8811	10245	9494	11007	10529	7976	11357	11185	10938	6902	13074	7417	11168	8722	11245	6710	12913	11690	12698	8809	13349	7799	8365	6113	10901	10938	8422
Syn	FBgn0004575	6706	6340	5938	6219	8017	8522	9465	10233	6120	8946	8588	8615	4596	10644	6384	8718	6842	8974	5798	10719	9869	10386	7521	10607	6789	6767	5305	7816	7997	7546
Pxd	FBgn0004577	11	9	6	10	9	5	3	14	4	14	9	9	2	45	3	25	4	43	0	36	8	16	3	37	5	5	3	6	10	11
Cbp53E	FBgn0004580	5675	5476	5063	5097	6386	5875	7212	7422	5400	7929	7313	7195	3948	10294	5340	7907	5228	7557	5018	8696	7519	8584	6179	9294	6082	5979	4284	6484	7212	7193
bgcn	FBgn0004581	0	4	3	4	1	1	6	0	0	3	3	5	3	6	2	2	5	6	1	6	7	5	3	3	3	4	1	3	6	3
ex	FBgn0004583	1021	1071	1158	1124	1307	1372	1518	1473	1070	1507	1611	1524	942	1762	1093	1547	1553	2336	993	1662	1788	1918	1226	1861	1097	1306	984	1951	1397	1235
Rrp1	FBgn0004584	176	195	141	199	305	276	252	210	617	909	551	596	167	332	554	739	970	1034	136	266	241	268	195	287	193	206	113	241	241	215
B52	FBgn0004587	6761	6092	6050	6707	7406	7595	7619	7770	6299	8766	8355	8568	4771	9751	6429	8612	6850	9598	5485	9686	8815	9184	7321	9712	6651	6834	5111	9207	7660	5795
Eig71Ea	FBgn0004588	0	0	0	0	0	0	1	0	0	0	1	0	0	0	0	0	0	0	0	0	0	0	0	0	0	0	0	0	0	0
Eig71Eb	FBgn0004589	0	0	0	0	0	1	0	1	0	0	0	0	0	0	0	0	1	0	0	1	0	0	0	1	0	1	0	0	0	0
Eig71Ec	FBgn0004590	0	0	0	0	0	0	0	0	0	0	0	0	0	0	0	0	0	0	0	0	0	0	0	0	0	0	0	0	0	0
Eig71Ed	FBgn0004591	0	0	0	0	0	0	0	0	0	0	0	0	0	0	0	0	0	0	0	0	0	0	0	0	0	0	0	0	0	0
Eig71Ee	FBgn0004592	0	0	0	1	0	0	0	0	0	0	0	0	0	0	0	0	0	0	0	0	0	0	0	0	0	0	0	0	0	0
Eig71Ef	FBgn0004593	0	0	0	0	0	1	0	0	0	0	0	0	0	0	0	0	0	0	0	0	0	0	0	0	0	0	0	0	0	0
Eig71Eg	FBgn0004594	0	0	0	0	0	0	0	0	0	0	0	0	0	0	0	0	0	0	0	0	0	0	0	0	0	0	0	0	0	0
pros	FBgn0004595	7075	6495	6644	5718	8365	10005	8845	10822	6671	9492	8797	8264	3207	9690	5886	9176	5890	8106	4395	9976	8527	10109	9060	11122	7696	6985	7714	7812	9435	8003
CycC	FBgn0004597	242	301	256	298	321	257	341	308	274	381	419	386	283	433	269	387	275	414	284	385	417	409	284	404	296	303	230	412	350	218
Fur2	FBgn0004598	5423	5378	4611	4729	5739	5424	6520	5423	5063	6878	7182	6807	3823	7235	4297	5943	4986	6910	3968	6617	7059	6846	5335	6980	4957	5454	3998	6828	6169	5005
zfh1	FBgn0004606	1097	1016	1108	997	1284	1466	1489	1125	1212	1383	1590	1558	774	1699	991	1379	1030	1559	989	1569	1637	1776	1364	1750	1194	1368	807	1585	1234	1129
zfh2	FBgn0004607	2766	2945	2749	2300	3257	3540	3926	3759	2691	3752	3811	3600	1933	3849	2637	3476	3105	3972	2334	3653	4203	4178	3402	4373	3230	3023	2525	4143	3480	3206
Plc21C	FBgn0004611	4957	4764	4476	4633	5427	5658	5946	5936	4752	6482	6502	6058	3412	6828	4731	5853	4700	5588	3908	6641	6927	6478	5452	6937	4587	4704	3801	5433	5595	4969
gl	FBgn0004618	1524	1971	1475	1839	1958	2007	2016	2128	1640	2274	2528	2437	1676	2808	1575	2506	2213	3199	1193	2357	2366	2713	2045	3003	1663	1829	1348	3067	2228	1861
GluRIA	FBgn0004619	805	770	656	703	793	799	978	1005	725	1069	950	968	644	1342	751	1081	883	1041	649	1126	1012	1128	800	1271	703	704	594	979	955	841
GluRIIA	FBgn0004620	267	304	233	286	342	303	345	285	203	312	367	338	277	383	271	330	306	307	251	355	407	372	353	343	297	319	167	461	286	221
TkR99D	FBgn0004622	288	337	246	320	322	345	379	355	290	373	412	380	283	472	274	375	339	426	247	394	463	485	360	467	245	266	256	425	382	271
Gbeta76C	FBgn0004623	39830	38662	36600	34044	38120	34471	42286	36872	32608	44834	42453	43744	36300	54189	32044	46708	37302	56036	29362	51567	45990	49668	38490	55420	35591	38268	26020	49873	38368	31247
Cys	FBgn0004629	4	2	3	5	0	3	1	2	4	0	5	2	4	1	3	2	1	1	5	6	7	7	12	12	2	4	2	5	6	2
rho	FBgn0004635	1154	1136	984	1048	1104	1034	1399	1146	1150	1212	1396	1377	826	1710	1132	1539	1040	1672	1131	1597	1698	1616	1188	1736	989	1145	798	1537	1226	1167
Rap1	FBgn0004636	3405	3346	3409	3448	4011	3735	4355	3663	3164	4301	4625	4376	2444	4661	3525	4093	3775	4954	3569	4992	5065	4959	3874	4794	3990	4020	2190	4831	4343	3869
drk	FBgn0004638	2083	2147	2194	2299	2874	2444	2433	1998	2131	2466	3045	2647	1848	2937	2477	2383	2250	2845	2492	2555	3227	2728	2331	2736	2486	2462	1808	2989	2429	2264
Zw10	FBgn0004643	602	587	591	621	624	578	783	540	593	924	824	918	620	894	567	738	647	774	501	875	837	922	657	881	533	701	424	851	647	495
hh	FBgn0004644	38	49	54	63	49	50	63	66	46	72	64	74	46	71	72	99	62	79	46	124	91	72	56	91	69	59	25	77	72	62
ogre	FBgn0004646	5306	5048	4674	4646	5752	4945	6638	4935	5262	6748	7213	7061	3887	7681	4152	5621	4714	7124	4843	7338	7259	6854	5508	7091	5007	5293	3666	6516	5721	5035
N	FBgn0004647	1558	1668	1581	1522	1920	1938	2105	1841	1534	2066	2169	2114	1134	2347	1314	1928	1679	2383	1196	2144	2390	2488	1805	2428	1609	1863	1379	2406	1892	1662
svr	FBgn0004648	8977	10209	8579	9144	11004	9915	10406	10322	8645	11815	12692	11032	8418	12835	8835	10715	10335	11900	7745	11785	12863	12378	9726	12830	8996	9621	7128	12579	11393	10008
yl	FBgn0004649	17	3	0	1	15	7	1	32	50	1	463	2	0	11	7	13	19	5	9	0	0	15	0	19	4	22	9	7	259	4
fs(1)N	FBgn0004650	3	6	3	4	3	2	6	12	8	1	27	7	1	4	9	4	8	4	6	7	9	7	4	6	3	9	3	7	16	4
fru	FBgn0004652	4169	3254	3416	2934	3906	3713	5519	5163	3599	4944	4181	4461	2104	6142	3589	4790	3217	4961	3090	5828	5169	5598	4326	5724	3838	3797	3062	4177	3895	3573
Pgd	FBgn0004654	4440	4071	3352	3459	4774	3885	5020	3925	4105	5102	5723	4959	3045	5233	2386	3751	2632	4040	2663	5101	4573	4940	2990	4282	3325	3695	3116	3604	3975	2703
wapl	FBgn0004655	1781	1826	1715	1784	2115	2105	2203	2236	1701	2396	2440	2205	1464	2711	1669	2145	2041	2589	1364	2483	2373	2578	1976	2708	1776	1797	1437	2605	2163	1603
fs(1)h	FBgn0004656	5575	5443	4721	4816	5579	6326	6450	6296	5618	7668	7531	6909	3854	7745	5427	6968	6102	7598	4089	6872	7161	7269	6781	9041	5051	5527	4350	6802	5982	5036
mys	FBgn0004657	2878	2999	2748	2847	3214	3012	3921	3612	2868	3705	4106	3642	2519	4550	2694	3572	3041	4461	2497	4434	4087	4100	3170	4266	2688	2998	2283	4006	3421	2938
sim	FBgn0004666	77	102	101	113	117	137	164	158	100	126	144	133	86	147	114	135	136	137	94	165	139	172	113	163	90	110	95	143	167	111
Mlc-c	FBgn0004687	2688	2872	2738	2842	3261	2929	3448	3043	2751	3612	4119	3794	2813	4139	3072	3724	3064	4569	2687	4309	4290	4003	3217	3963	3013	3177	2103	4459	3499	3130
Xpc	FBgn0004698	1969	1915	1753	1975	2133	2073	2369	2389	1740	2560	2484	2431	1732	2996	1940	2720	2278	3173	1676	2997	2782	3013	2017	3002	1966	2292	1248	2796	2390	2028
Ccp84Ag	FBgn0004777	8	7	1	3	3	3	14	19	0	0	4	10	11	25	6	12	5	6	7	9	5	9	0	1	6	3	1	0	4	3
Ccp84Af	FBgn0004778	0	0	0	0	0	0	0	0	0	0	1	1	0	0	0	0	0	0	0	1	0	0	0	0	0	0	0	0	0	0
Ccp84Ae	FBgn0004779	0	1	1	1	1	1	1	0	1	0	0	0	0	0	2	0	0	4	0	1	0	0	0	3	0	1	0	0	1	0
Ccp84Ad	FBgn0004780	1	3	2	1	0	1	1	5	0	2	1	3	0	18	0	4	0	3	2	9	0	7	0	9	1	2	1	3	2	6
Ccp84Ac	FBgn0004781	0	0	3	0	0	0	0	1	0	0	0	0	0	5	0	0	0	1	0	3	1	1	0	3	0	1	0	0	3	1
Ccp84Ab	FBgn0004782	17	19	10	13	19	13	28	55	6	33	5	10	4	138	8	82	5	85	11	83	7	96	6	72	14	7	2	6	26	42
Ccp84Aa	FBgn0004783	11	17	8	14	8	7	22	44	18	22	1	4	1	87	6	36	2	33	8	47	5	70	4	34	6	15	2	6	12	16
inaC	FBgn0004784	24559	26078	23050	24217	29067	26706	29174	28463	23656	33607	32975	31919	22129	36878	22909	31300	27963	35773	20613	32979	33186	34211	28158	37983	25293	28114	17958	37960	29373	27279
retn	FBgn0004795	1778	2178	1785	2154	2070	2422	2131	2420	1695	2403	2448	2194	1557	2803	1595	2471	2069	3225	1275	2246	2357	2874	1956	3033	1965	2198	1569	3399	2320	1965
mdy	FBgn0004797	3665	3466	3137	2934	3313	2796	3023	1912	2802	3515	4148	3357	2947	3377	2919	2252	2230	2636	2699	2067	4710	2488	2836	2522	2965	2789	2259	3494	3447	2851
fs(2)ltoPP43	FBgn0004811	661	654	497	576	671	568	640	494	549	665	754	727	582	770	526	551	567	690	523	702	812	678	629	749	571	581	448	723	674	513
His3.3B	FBgn0004828	16722	16725	16207	16602	19800	18156	19748	17823	15377	20510	22136	21064	17024	24450	17660	20374	19589	23376	16225	23674	23818	23252	19291	24531	17916	18219	12841	23731	21119	16558
Xpac	FBgn0004832	168	182	198	161	208	178	241	155	161	249	236	217	204	335	165	233	185	230	185	331	290	284	177	252	165	191	122	283	222	141
Su(H)	FBgn0004837	654	722	576	644	723	707	824	717	571	750	941	745	561	864	540	742	679	976	500	810	777	836	653	915	598	619	488	1012	819	642
Hrb27C	FBgn0004838	14594	14947	14413	14668	17378	17095	18276	16563	14622	19332	20243	19345	9479	20182	15077	18221	14131	19984	14524	20714	21940	21307	17558	21653	16656	16826	11378	19836	17051	16994
otk	FBgn0004839	109	113	86	100	113	145	145	134	91	176	143	161	68	163	111	133	123	149	98	143	131	147	138	175	102	98	81	139	121	115
TkR86C	FBgn0004841	149	154	152	132	168	195	220	216	145	219	205	170	128	293	159	239	147	207	105	245	240	275	148	280	148	132	112	212	196	180
RYa-R	FBgn0004842	32	24	20	26	37	19	35	37	22	42	43	44	25	49	26	38	25	39	29	36	29	38	27	40	21	23	23	26	34	26
Ac76E	FBgn0004852	2694	2654	2429	2410	2883	2866	3403	2983	2503	3161	3275	3102	2080	3577	2438	2989	2420	3423	2150	3322	3746	3288	2633	3421	2588	2823	1893	3227	2994	2372
B-H2	FBgn0004854	220	216	199	209	261	258	295	282	197	260	297	287	164	321	191	301	238	331	187	302	297	312	231	365	191	215	149	359	215	201
RpII15	FBgn0004855	453	480	401	429	468	415	475	365	370	539	531	521	417	563	425	532	407	564	377	622	576	506	383	513	408	411	297	625	475	361
Bx42	FBgn0004856	1179	1295	1248	1302	1368	1185	1469	1227	1137	1542	1556	1546	1496	1847	1236	1546	1384	1842	1035	1677	1770	1830	1110	1741	1204	1354	854	1670	1386	1039
elB	FBgn0004858	1021	1048	928	1055	1236	1219	1372	1243	941	1427	1499	1529	851	1787	1054	1526	1264	1741	930	1668	1434	1546	1193	1648	1111	1258	779	1585	1290	1052
ci	FBgn0004859	987	1066	1047	1055	1283	1201	1309	1243	940	1331	1477	1309	693	1561	1101	1376	1064	1569	1053	1536	1500	1431	1242	1530	1195	1308	839	1622	1310	1246
ph-d	FBgn0004860	649	639	576	579	804	736	735	774	566	820	832	771	465	945	570	783	672	825	518	911	875	917	665	1003	577	647	590	949	797	645
ph-p	FBgn0004861	1259	1235	1192	1209	1395	1443	1604	1631	1109	1745	1714	1600	851	2057	1053	1682	1329	1927	969	2000	1776	1872	1370	2010	1188	1295	1005	1789	1557	1213
bap	FBgn0004862	13	15	24	19	28	15	28	26	20	24	36	17	18	28	18	25	23	27	17	32	27	32	27	30	16	32	12	34	21	23
C15	FBgn0004863	41	39	25	58	27	48	45	46	28	54	36	45	34	45	22	38	34	49	31	47	57	42	18	39	24	26	26	41	42	45
hop	FBgn0004864	1098	1107	1081	1056	1232	1155	1359	1174	1034	1469	1451	1424	945	1596	954	1422	1233	1526	920	1619	1625	1603	1155	1628	1153	1243	873	1517	1272	980
Eip78C	FBgn0004865	719	671	539	602	727	760	945	861	669	986	817	808	397	1071	598	877	599	850	560	1052	965	964	766	1066	675	660	539	831	786	716
RpS2	FBgn0004867	35936	35134	42757	39758	38061	36578	39527	30324	35811	44188	49557	48429	49516	42376	30816	40448	38897	50477	26102	41128	49810	48848	40510	43764	42237	50752	32056	58288	47306	27909
Gdi	FBgn0004868	8693	8821	7747	8483	8798	8251	9995	7984	7801	10735	10752	10399	8038	11479	7648	9165	7906	10181	7355	10898	11444	11144	8391	10929	7878	8960	6043	10585	9974	7504
bab1	FBgn0004870	230	191	225	230	299	276	241	292	224	319	287	270	150	308	213	263	233	291	144	297	273	264	268	355	226	192	172	325	264	219
piwi	FBgn0004872	25	14	12	9	25	7	13	14	30	19	23	12	4	12	14	15	7	15	19	5	28	21	9	15	14	7	3	8	31	14
enc	FBgn0004875	4862	4527	4393	4427	5261	5703	6362	6320	4452	6509	6049	5834	3026	7257	4077	5771	4461	5858	3425	6837	6356	6988	5308	7149	4546	4702	4146	6037	6023	4600
cdi	FBgn0004876	2900	2754	2718	2782	3172	3160	3642	3200	2989	3695	4008	3635	2368	4328	2647	3424	3156	3910	2567	3959	4404	4371	3310	4276	3123	3619	2500	4272	3563	3039
cas	FBgn0004878	1	2	1	2	1	0	3	5	2	4	3	4	0	2	0	5	1	3	2	2	4	1	1	1	7	0	3	0	3	1
scrt	FBgn0004880	2930	2862	2830	2692	3392	3717	3755	4329	2879	4121	3663	3614	1513	4279	2799	3816	2820	3733	2483	4549	4275	4631	3864	4938	3275	3139	2623	3444	3865	3715
orb	FBgn0004882	576	532	501	445	640	689	784	876	587	861	696	642	358	904	495	707	602	848	469	831	754	812	709	937	620	569	538	682	748	711
tok	FBgn0004885	5328	5007	4927	4695	5608	5315	6178	5578	4885	6272	6510	5743	4094	6459	4709	4857	5236	5392	4231	5698	7570	5988	4814	5816	5193	5044	3463	6267	6182	4474
Scsalpha	FBgn0004888	11179	11129	10705	11382	11208	10146	12384	9530	10533	13541	13604	13382	11416	13636	9966	12373	9519	13909	8789	13658	14088	13450	10185	13279	9885	11411	8043	13626	12469	8893
tws	FBgn0004889	3263	3327	3306	3272	3914	3719	3847	3615	3148	4141	4768	4198	2574	4534	3405	4083	3647	5138	3131	4568	4903	4602	3842	5008	3833	3846	2502	5098	3944	3649
sob	FBgn0004892	52	42	35	42	61	48	63	46	51	64	73	70	41	67	55	61	50	116	41	71	66	78	58	67	49	58	47	75	77	41
bowl	FBgn0004893	619	681	601	655	717	713	833	781	598	836	939	816	504	890	592	810	743	1095	533	910	944	924	773	1017	615	755	491	1075	807	669
fd64A	FBgn0004895	1	0	1	0	0	0	0	0	0	0	0	0	0	0	0	0	0	1	0	1	0	0	0	0	0	0	0	0	0	2
fd59A	FBgn0004896	242	237	240	237	290	304	334	346	235	336	340	323	199	340	215	328	253	363	197	370	371	442	308	382	229	255	180	316	293	255
fd96Ca	FBgn0004897	19	14	16	20	18	18	20	15	21	31	36	28	19	38	14	17	11	28	9	28	18	23	17	27	24	12	11	26	16	25
fd96Cb	FBgn0004898	28	23	23	32	22	32	24	22	18	35	35	32	20	29	16	37	39	53	11	31	34	27	25	40	19	20	15	43	26	25
Prat	FBgn0004901	210	209	218	221	245	230	267	261	209	335	295	314	302	413	213	306	294	370	204	388	338	402	245	350	254	277	171	338	263	190
Rb97D	FBgn0004903	1080	1031	1085	1088	1272	1291	1407	1457	1071	1503	1607	1534	921	1922	1181	1589	1261	1630	1134	1803	1541	1571	1225	1734	1176	1183	895	1530	1390	1130
14-3-3zeta	FBgn0004907	34974	38392	34801	37630	44850	40777	45486	43182	35311	49815	50255	48940	32425	58611	38313	49456	40255	54838	36480	54711	52551	53928	40725	56706	39474	40629	25685	50115	46538	43246
Arl2	FBgn0004908	187	207	238	193	228	189	217	188	192	267	273	285	223	283	186	233	191	310	200	269	282	291	191	303	198	237	164	314	234	194
Eip63F-1	FBgn0004910	2093	1825	2043	1884	2288	2142	2817	2296	1969	2648	2838	2694	1703	2976	2652	2564	2455	3150	2560	3038	2933	2602	2598	2863	2683	2393	1493	2584	2699	2355
Eip63F-2	FBgn0004911	6	12	9	6	6	7	7	11	13	13	9	10	5	15	9	17	7	17	10	8	17	22	7	12	9	19	15	10	8	8
Gnf1	FBgn0004913	653	771	645	660	809	749	908	783	587	966	976	928	622	1106	644	846	776	921	647	988	1012	1019	747	945	638	801	511	965	857	654
Hnf4	FBgn0004914	3556	3315	3504	3782	4107	3788	4253	3433	3466	4176	4912	4195	3186	5147	3495	3809	3677	4994	3357	4460	4899	4134	3649	4296	3256	3501	2379	5046	4084	3275
TfIIB	FBgn0004915	714	713	670	764	836	730	934	707	694	974	967	919	755	1094	680	887	776	1018	701	1043	994	1032	748	1055	662	806	486	988	880	663
gol	FBgn0004919	2507	3033	2518	3022	3206	3598	2684	3311	2600	3891	3558	3492	2320	4577	2407	4001	2913	4799	1881	4206	3407	4671	2930	5358	2733	3165	2082	4046	3216	3192
Ggamma1	FBgn0004921	23627	24907	22407	24272	29129	27088	31262	30461	22387	31755	31544	31205	20798	41557	26545	35875	28005	38400	23271	38066	34706	37061	27853	39105	26762	26671	18201	33300	30177	27984
Top1	FBgn0004924	3541	3514	3305	3340	3851	3791	4545	4002	3298	4953	4689	4625	2488	5059	3115	3986	3225	4631	2982	5002	5082	5182	3839	5093	3471	3899	2457	4476	3880	3484
eIF-2beta	FBgn0004926	2914	3164	2837	3110	2846	2709	3462	2382	2933	3956	3800	3854	2775	3783	2711	3227	2831	3666	2723	3688	4293	4294	3078	3789	2893	3291	1906	3468	2901	2467
upd1	FBgn0004956	1	4	0	3	2	3	2	1	2	2	5	2	1	3	1	4	2	2	2	1	3	3	5	3	2	5	1	3	1	0
por	FBgn0004957	173	198	179	216	191	183	218	204	145	231	227	228	209	319	177	237	196	266	150	271	246	297	191	246	190	227	138	294	233	181
phm	FBgn0004959	30	26	34	36	27	30	48	48	25	34	42	33	17	52	30	51	23	46	31	74	37	43	34	52	31	35	19	62	26	17
gig	FBgn0005198	2109	2001	1927	1996	2080	2103	2500	2159	1929	2710	2776	2665	1747	2712	1922	2257	2121	2587	1768	2744	2919	2701	2063	2823	1949	2099	1451	2517	2224	1903
Sam-S	FBgn0005278	12014	11825	10247	10376	16321	11110	13352	8393	10800	13318	15307	12141	7272	10528	8970	9361	9231	11245	9931	10000	16601	11436	12098	11761	10145	10163	9443	13618	13239	8578
nmd	FBgn0005322	948	1005	952	1114	1122	1098	1182	1035	983	1354	1341	1338	1153	1314	1079	1201	1128	1464	1109	1419	1527	1368	1098	1475	1020	1159	662	1347	1125	945
Su(fu)	FBgn0005355	534	530	551	641	601	595	609	563	499	723	743	742	660	843	526	697	633	804	440	767	788	810	568	785	533	711	416	766	693	519
ash1	FBgn0005386	1341	1387	1360	1360	1563	1640	1805	1578	1324	1938	1834	1711	1071	1940	1279	1659	1526	1831	1102	1867	1968	1885	1618	2086	1354	1474	1046	1884	1575	1372
fs(1)M3	FBgn0005390	20	20	23	22	24	23	15	21	11	17	21	12	12	36	37	42	23	40	22	31	24	36	42	63	24	25	7	25	43	36
Yp2	FBgn0005391	1120493	920843	888991	845448	1112569	881868	844060	318647	890131	720602	1331708	1044588	316354	531544	386327	271518	259709	259838	586618	302946	1075317	519640	765581	457733	477407	482424	568622	665695	905507	404138
U2af50	FBgn0005411	1565	1526	1608	1686	1947	1716	2016	1609	1466	1947	2075	1983	2076	2293	1907	2100	1999	2427	1672	2173	2341	2103	1792	2296	1963	2020	1243	2451	2090	1438
ewg	FBgn0005427	2174	2132	2035	2251	2621	2572	2623	2703	2017	2864	2968	2907	1820	3146	2169	2908	2618	3201	2100	3152	3203	3102	2522	3314	2354	2295	1643	3409	2872	2242
RpS17	FBgn0005533	19276	18850	22552	21589	21091	19806	20805	15569	19767	24222	26921	25365	26818	22932	17253	21479	20079	26295	15767	23791	28314	25449	22530	25316	20757	24729	17630	29670	23576	13467
Mbs	FBgn0005536	5579	6156	5409	5889	6262	6629	7811	7327	5357	7351	7113	7520	4028	8973	5033	7935	6174	9894	4497	9443	8039	8937	5829	7945	5182	6089	4185	7844	6197	5737
ey	FBgn0005558	936	895	849	1015	1068	1103	1080	1185	880	1185	1247	1217	835	1596	897	1304	1019	1295	755	1326	1285	1394	999	1506	903	944	749	1272	1114	934
sv	FBgn0005561	1013	1051	971	955	1248	1247	1417	1373	970	1573	1629	1409	878	1820	1106	1667	1314	1869	916	1644	1582	1664	1184	1857	1191	1246	919	1773	1389	1309
Shal	FBgn0005564	2225	2193	2116	2217	2720	2617	3025	3270	2240	3171	3131	3012	1817	3784	2201	3190	2342	3222	2039	3711	3045	3648	2559	3748	2419	2339	1825	3006	2855	2559
Calr	FBgn0005585	11776	14224	12131	13831	12162	11403	14687	10867	10988	20262	15099	19157	11252	21755	9800	14832	10800	15524	11028	19272	16637	18772	10963	17566	9531	12813	7909	15162	12235	11052
Rab3	FBgn0005586	6563	6798	5814	6415	7843	7810	8051	8838	6091	9257	9088	8791	4082	10287	5884	8905	6810	8866	5333	10390	8678	10061	7266	11194	6772	6714	5083	8582	8775	7900
scw	FBgn0005590	3	4	5	2	6	10	8	5	7	5	4	2	4	12	4	10	9	11	5	8	7	2	12	8	4	2	0	6	7	9
btl	FBgn0005592	372	484	481	507	574	489	530	515	347	485	574	557	275	586	331	510	406	601	325	615	535	583	397	553	297	370	382	575	452	364
RpL7	FBgn0005593	38123	37748	42480	44066	41876	40086	42546	33145	40187	48316	55974	52389	45047	44828	35092	44059	41519	54825	31630	47598	54851	50749	44417	49035	41892	50092	30116	60416	46643	28807
yem	FBgn0005596	344	314	298	352	355	360	387	375	284	416	491	394	302	488	294	343	368	454	291	405	479	465	341	475	362	347	259	530	463	318
Sox14	FBgn0005612	1239	1210	1261	1233	1403	1410	1190	1046	1125	1260	1635	1099	886	1311	963	1087	1095	1546	786	1306	1598	1341	1208	1377	1109	1114	888	1808	1514	935
Sox15	FBgn0005613	150	162	179	200	215	196	250	191	178	254	282	241	162	251	157	237	213	294	146	276	289	268	169	328	190	231	124	319	287	169
trpl	FBgn0005614	75560	79947	72028	81484	82228	83604	73306	72156	71366	100797	107393	102723	78308	106651	60595	80401	83594	108256	43677	82049	90673	101104	76539	107261	73855	89069	55169	121040	91862	69975
msl-2	FBgn0005616	736	772	761	792	861	843	1194	1147	742	1142	1132	1122	688	1264	768	1011	958	1253	705	1144	1262	1244	981	1244	843	895	629	1273	985	933
msl-1	FBgn0005617	894	851	909	892	1047	1128	1129	1000	835	1253	1299	1178	673	1178	867	1107	933	1230	818	1236	1341	1298	1004	1392	975	1011	726	1308	1028	955
Hdc	FBgn0005619	2995	2625	2696	2529	2710	2571	3763	3477	2848	4164	3386	3469	1971	4117	2818	4090	2711	3912	2410	4725	4442	4611	3177	4531	2720	2974	2339	4430	3353	2473
Psc	FBgn0005624	369	370	316	311	431	434	462	439	366	485	451	442	272	542	290	428	372	566	267	502	590	633	396	529	332	382	238	518	444	364
ple	FBgn0005626	5034	4804	4817	4933	5553	4756	6369	3760	5008	5699	5791	6005	2320	6299	3278	4248	2577	4092	4306	5079	6024	4426	4661	5772	3899	4752	3044	4182	5123	4865
robo1	FBgn0005631	1483	1567	1356	1361	1679	1758	1931	1972	1421	2012	2004	1969	972	2316	1407	2051	1517	2115	1192	2201	2076	2255	1742	2445	1521	1697	1237	2005	1920	1647
faf	FBgn0005632	8880	8492	8647	8459	10105	10416	11370	10441	8496	11753	11987	10904	6150	11874	7512	10229	9082	10886	6592	11088	11909	11909	9713	11769	8687	9289	7162	11491	10573	8234
fln	FBgn0005633	24	33	34	31	34	32	51	31	36	52	47	46	37	51	37	50	34	47	35	49	51	45	39	51	58	46	24	46	61	71
nvy	FBgn0005636	568	509	505	533	663	643	768	774	485	775	665	697	461	913	524	723	537	669	434	817	719	772	574	921	521	512	447	714	616	520
slbo	FBgn0005638	44	54	38	30	44	64	46	45	38	60	52	46	63	70	39	55	53	69	29	49	49	62	38	84	56	66	32	84	46	32
Eip63E	FBgn0005640	2811	2944	2897	2745	3265	3217	3381	3524	2853	3683	3901	3599	2454	4301	3054	3653	3245	4083	2386	4130	4136	4172	3334	4247	3069	3127	2199	3893	3346	3159
wdn	FBgn0005642	787	798	833	870	876	914	987	828	810	999	1086	1000	914	1091	884	1034	1054	1252	653	967	1235	1188	938	1281	807	951	569	1255	986	696
Pabp2	FBgn0005648	675	748	672	727	810	681	973	692	627	1000	1044	1162	633	1159	683	814	713	983	890	1058	1084	1066	789	1072	859	938	598	1143	926	858
Rox8	FBgn0005649	3771	3668	3276	3786	4175	4067	4476	4164	3624	4839	5110	4666	2940	5361	3499	4471	3969	5099	3138	4923	5215	5070	3988	5297	3451	3751	2800	5136	4316	3710
lat	FBgn0005654	0	0	0	0	0	0	0	0	0	0	0	0	0	0	0	0	0	0	0	0	0	0	0	0	0	0	0	0	0	0
PCNA	FBgn0005655	84	168	87	120	77	88	95	71	149	262	183	223	26	86	43	97	25	109	70	118	105	178	82	134	34	69	83	33	100	127
Ets65A	FBgn0005658	627	574	599	641	798	815	771	814	618	822	803	757	460	893	593	876	674	921	521	910	938	893	714	1027	670	644	562	822	771	718
Ets98B	FBgn0005659	1238	1271	1246	1301	1377	1481	1252	1188	1180	1335	1544	1439	1110	1554	1124	1402	1205	1589	969	1380	1839	1474	1293	1423	1168	1391	806	1702	1440	1164
Ets21C	FBgn0005660	63	74	57	65	71	59	68	63	66	69	64	57	72	74	84	49	93	65	86	84	100	86	41	71	66	97	25	75	55	56
Crys	FBgn0005664	157	153	142	184	172	201	299	509	105	224	92	133	41	700	46	376	33	688	65	669	409	977	137	548	642	632	140	352	196	282
bt	FBgn0005666	17648	20487	23163	17958	23793	26846	31482	28713	21742	28105	26359	23776	9342	25823	16378	28345	16374	34837	12475	25955	26770	30591	19647	25945	21183	24817	19763	27644	24375	25499
Cyp4d1	FBgn0005670	979	930	939	958	912	854	686	362	8	18	12	8	809	414	448	188	924	586	795	554	843	409	16	9	1069	1049	767	1268	1193	571
Vha55	FBgn0005671	15970	16803	15269	16247	18823	17806	20552	20818	15241	21522	22465	21498	13226	26463	13518	22582	16050	25429	12515	26398	21781	25222	16739	26404	14438	17029	12385	22650	19593	16327
spi	FBgn0005672	2049	2077	2106	2153	2511	2507	2792	2598	2068	2925	2969	2908	2214	3535	2249	3006	2855	3772	2099	3637	3303	3467	2504	3562	2170	2258	1560	3784	2784	2058
GluProRS	FBgn0005674	2073	2195	1877	1998	2096	1960	2443	1932	1806	2550	2378	2438	1615	2510	2010	2121	2058	2495	1734	2325	3084	2816	2154	2538	2131	2469	1398	2347	1977	2009
dac	FBgn0005677	830	807	780	781	979	978	1090	1171	813	1202	1063	1016	602	1391	794	1142	898	1141	633	1262	1194	1256	1011	1437	823	858	682	1016	1007	788
pie	FBgn0005683	41	29	36	49	44	43	49	42	24	55	53	76	38	81	37	54	50	64	40	53	40	86	38	70	38	60	32	47	53	31
Aef1	FBgn0005694	1809	1848	1675	1832	2126	1998	2507	2071	1807	2441	2388	2285	1174	2809	1773	2301	1787	2548	1589	2671	2622	2731	2063	2675	1828	1954	1330	2567	2062	1882
gcl	FBgn0005695	590	631	653	630	754	719	743	706	611	845	868	752	536	885	618	810	721	1028	524	908	941	913	754	944	619	720	526	1002	815	610
DNApol-alpha73	FBgn0005696	63	71	61	64	53	55	59	34	54	102	71	80	46	73	42	68	47	60	43	72	73	83	41	79	29	50	31	48	70	42
noc	FBgn0005771	1659	1692	1537	1695	1963	1886	2158	1819	1687	2159	2406	2309	1435	2774	1583	2187	1820	2525	1526	2504	2295	2361	1836	2447	1671	1866	1374	2414	2195	1757
Con	FBgn0005775	2352	2382	2011	2260	2685	2790	2834	3131	2091	3040	3187	2870	1453	3562	2025	3021	2248	2869	1945	3539	3132	3448	2795	3825	2415	2364	1985	2812	3167	2811
PpD3	FBgn0005777	1088	1087	951	1120	1163	1052	1293	1095	1089	1509	1389	1415	882	1547	1013	1267	1009	1379	1109	1363	1503	1584	1089	1481	940	1147	762	1328	1197	1046
PpD5	FBgn0005778	12	13	7	9	9	8	10	8	2	6	11	9	2	2	3	12	5	26	3	17	10	23	6	7	5	8	3	8	8	7
PpD6	FBgn0005779	0	0	0	1	0	0	0	2	1	1	0	0	0	1	1	0	0	0	1	0	1	0	1	0	0	0	0	1	1	0
betaCOP	FBgn0008635	4574	4700	4154	4452	4635	4558	5027	4037	4107	5580	5640	5751	3886	5986	3483	4722	4121	5193	3283	5580	6044	5926	4242	5730	3790	4528	3014	5476	4929	3590
hbn	FBgn0008636	188	192	167	194	207	191	242	226	165	276	227	267	139	286	162	256	170	243	155	327	258	318	203	296	183	200	154	251	206	179
E5	FBgn0008646	84	94	98	134	118	102	113	111	109	124	138	124	94	144	112	119	115	186	81	152	93	132	86	153	87	118	58	178	116	79
lbl	FBgn0008651	138	169	226	211	196	191	183	205	199	204	245	192	224	263	223	258	264	347	176	262	267	255	173	255	245	264	157	341	249	180
CanB	FBgn0010014	2305	2249	2079	2347	2680	2367	2813	2603	2152	3023	3071	3028	1943	3565	2316	3112	2220	3083	2168	3583	3152	3299	2538	3637	2317	2303	1649	3163	2760	2411
CanA1	FBgn0010015	255	273	330	304	395	315	416	301	291	346	435	362	254	316	359	327	300	374	214	359	413	339	351	363	315	334	193	451	395	248
Cyp4g1	FBgn0010019	474	567	736	409	55	190	1025	726	835	505	241	180	1466	414	2297	222	2648	931	2374	586	643	118	295	518	1033	1066	152	140	434	422
GstD2	FBgn0010038	119	202	118	122	258	214	128	115	142	204	270	201	209	202	98	162	200	258	132	216	159	124	157	211	177	182	113	304	191	113
GstD3	FBgn0010039	606	664	819	858	1472	1209	1086	986	742	1075	1186	1236	726	1166	854	1285	1286	2383	1103	1781	1455	1535	732	981	1309	1397	593	1198	1202	897
GstD4	FBgn0010040	6	5	11	9	24	12	10	14	7	9	11	20	4	9	16	16	21	42	20	30	19	41	5	11	22	19	6	15	12	15
GstD5	FBgn0010041	15	15	6	6	10	6	12	11	14	15	35	45	21	10	14	10	12	10	15	18	6	16	21	55	14	10	15	11	14	4
GstD6	FBgn0010042	2	1	1	8	6	4	2	7	4	14	12	3	3	9	5	5	5	6	5	7	7	5	6	4	7	4	1	7	1	0
GstD7	FBgn0010043	1	3	3	3	12	5	2	3	4	14	9	5	2	1	3	5	5	9	1	9	7	20	5	3	7	7	2	9	10	5
GstD8	FBgn0010044	123	128	156	172	219	196	197	192	114	229	196	209	91	199	132	269	254	314	161	278	280	268	152	193	183	204	87	217	232	152
Itp-r83A	FBgn0010051	6126	6076	5860	5063	6614	6746	6458	6389	5668	7195	7044	6011	3657	6596	4941	5887	5669	6931	3937	6159	7103	6806	6488	7415	5705	6204	4545	7082	6742	5281
Jhe	FBgn0010052	107	135	129	159	135	128	165	190	122	261	115	237	137	334	188	282	155	264	146	226	219	346	113	315	151	259	116	188	154	178
Jheh1	FBgn0010053	2952	3052	3803	3907	5087	3845	4323	2533	3303	3594	4346	3602	4847	4826	2500	2821	3203	3866	3052	3231	4343	2684	3630	3726	3028	3037	2460	4792	3316	2190
RpL23	FBgn0010078	24402	22987	28724	27479	26546	24161	27129	20427	24685	28958	34103	32492	30579	28011	21852	25886	24942	32105	20386	29937	35173	31178	27111	29110	26106	30026	19465	36541	29584	17401
gammaTub37C	FBgn0010097	1	0	1	0	2	2	0	4	6	1	20	2	0	1	1	2	1	1	0	1	0	0	0	1	0	1	1	1	19	0
Acon	FBgn0010100	28824	31546	26507	29373	31305	29409	41817	35331	29290	41645	38252	37688	19724	45096	23053	39483	25888	46227	21174	44757	40065	44063	27877	43226	23932	28272	21910	42226	31925	29386
comm	FBgn0010105	663	678	630	635	783	752	763	748	625	912	831	904	551	1087	582	926	722	1031	506	991	916	1064	738	1067	595	709	581	963	764	639
dpn	FBgn0010109	0	3	3	2	1	3	4	5	2	7	7	5	0	2	5	2	0	2	2	3	2	2	4	6	1	4	2	2	1	5
hdc	FBgn0010113	1398	1275	1186	1026	1307	1421	1732	1394	1353	1922	1768	1608	814	1836	1255	1620	1195	1657	1123	1775	1849	1706	1716	2009	1558	1632	1133	1696	1617	1505
hig	FBgn0010114	10869	9884	9399	9700	12757	12221	13442	13902	9760	13913	12727	13038	7741	17252	8958	13225	10349	12979	7956	16114	14580	16594	12044	17166	9270	9524	8038	12699	11929	9338
RpA-70	FBgn0010173	986	1015	1023	1121	1176	1059	1214	1056	959	1430	1339	1355	1008	1531	1056	1214	1118	1326	1046	1390	1524	1402	1024	1562	1106	1172	683	1370	1254	1058
Wnt5	FBgn0010194	514	544	465	479	583	560	716	709	580	755	608	674	350	937	471	728	524	740	444	853	773	878	570	878	517	521	415	686	623	582
Gyc32E	FBgn0010197	53	55	84	80	104	97	81	79	94	112	92	66	99	154	73	80	65	92	63	82	105	95	95	130	67	65	54	88	108	55
RpS15Aa	FBgn0010198	23366	23953	26252	25198	25285	22759	26313	20126	22028	26728	30464	28091	29902	27018	22264	24596	21712	28561	23593	27458	31978	26909	25311	27262	25524	27070	19016	32938	24961	18623
Sod2	FBgn0010213	3562	3669	3337	3750	3779	3637	4548	3665	3657	4968	4901	4710	3371	5451	2898	4780	3092	5444	2732	5042	4451	4821	3583	5018	3020	3425	2587	4739	4216	3216
alpha-Cat	FBgn0010215	3066	3232	3017	3287	3799	3635	4050	3893	3110	4205	4642	4306	2850	4944	3648	4282	3747	4475	3642	4676	4509	4373	3516	4727	3328	3469	2422	4417	3916	3796
ATPsynbeta	FBgn0010217	63414	67808	58098	63419	69255	61425	81216	71111	61019	88859	80196	81917	41388	98327	49559	90861	51289	102898	48425	92751	80419	93011	58282	89757	51276	58930	43539	80788	65754	65299
Dbp45A	FBgn0010220	456	465	538	534	557	487	611	462	407	624	632	608	581	752	543	574	586	637	412	716	715	764	580	733	572	650	338	720	607	412
Nmdmc	FBgn0010222	508	511	556	563	619	611	621	630	504	917	646	626	1148	1302	577	736	731	1041	398	717	643	899	468	892	572	712	306	693	588	460
Galphaf	FBgn0010223	87	76	76	99	84	101	88	71	116	108	135	92	74	81	78	98	93	126	61	99	76	74	100	115	91	94	85	200	125	77
Gel	FBgn0010225	29704	28113	24903	26192	30187	25865	28907	17471	25627	29363	34454	28816	19556	26366	20393	18439	20110	21724	20886	20657	38794	24933	26036	24091	23336	24632	17157	28491	27877	19945
GstS1	FBgn0010226	3164	2850	2705	2787	2696	2798	2517	1916	2692	2970	3346	2936	1848	2003	2293	2422	2234	3087	2132	2879	3600	2663	2382	2246	2145	2584	1614	2672	2375	1661
HmgZ	FBgn0010228	3536	3886	3499	3926	4400	4019	4255	3836	3389	4858	5964	5221	3592	4772	3313	4090	4333	5311	3820	5019	5203	4620	3889	4810	4075	4199	3067	6152	5282	4068
Klc	FBgn0010235	2720	2878	2527	2675	3062	2832	3617	3095	2545	3597	3665	3541	2654	4444	2693	3590	2881	3846	2598	4169	3967	3849	2913	4142	2815	3103	1971	4025	3512	2694
Lac	FBgn0010238	2675	2857	2679	2821	3228	2944	3691	3106	2671	3514	4157	3736	2926	4354	2759	3590	3329	4491	2435	4260	3998	3822	2880	4152	2839	3159	2283	4308	3693	2932
Lcch3	FBgn0010240	545	539	483	565	613	577	745	723	479	731	714	723	512	998	631	839	561	881	550	932	824	868	621	911	556	552	427	790	688	605
Mdr50	FBgn0010241	22	22	12	19	26	11	18	12	23	28	25	6	5	13	14	9	9	8	19	12	44	21	48	54	71	85	64	34	175	71
Myo61F	FBgn0010246	852	813	768	791	728	687	867	675	683	946	1376	995	670	743	688	527	798	717	641	592	1052	711	810	694	804	921	537	867	941	713
Parp	FBgn0010247	759	859	682	731	872	840	1074	953	664	991	809	820	628	1198	941	1200	801	1119	832	1118	1166	1103	875	1194	833	812	464	855	960	1041
Rbp4	FBgn0010258	4	3	4	11	3	8	7	6	5	14	6	2	3	7	1	9	9	9	3	8	9	7	8	10	8	4	4	12	9	9
Rbp9	FBgn0010263	19443	19358	18268	18719	23370	21924	23938	21182	21008	27622	27873	26615	16453	28332	23322	29616	26847	37135	17785	26564	30291	28011	23989	30235	20900	21377	13314	29628	21421	19171
RpS13	FBgn0010265	23379	23001	26168	26370	26428	24655	26096	20406	24182	29152	34513	32385	28167	27753	21127	27320	23806	32875	19896	28603	32368	29858	26192	30083	25258	29466	18844	34792	28611	19060
Dsor1	FBgn0010269	827	821	762	792	842	875	992	867	768	968	1098	966	813	1170	712	1045	854	1017	736	1159	1104	1085	847	1158	746	873	617	1079	1021	696
Ssrp	FBgn0010278	556	571	535	626	542	530	698	517	490	757	742	807	446	813	503	657	582	723	485	723	804	848	613	771	496	671	343	747	676	489
Taf4	FBgn0010280	3562	3346	3160	3400	3842	3942	4461	4178	3225	4363	4576	4337	2518	4708	3280	4268	3731	4711	2999	4714	5141	4793	3811	4929	3398	3710	2562	4843	4028	3173
TfIIFalpha	FBgn0010282	741	844	719	850	835	720	949	748	690	1015	1045	1089	558	1093	631	824	760	1060	680	1033	1096	1103	842	1085	691	857	502	1012	852	723
Trf	FBgn0010287	100	108	87	99	118	77	132	104	108	156	109	115	123	153	94	128	112	150	109	154	142	161	101	132	116	123	79	140	122	84
Uch	FBgn0010288	792	876	828	887	927	871	960	740	723	1025	1072	1050	739	1150	792	953	820	1113	748	1043	1133	1030	877	1160	716	750	577	1227	1032	715
bys	FBgn0010292	420	453	446	441	548	437	521	464	498	585	533	610	442	588	496	566	545	648	409	634	737	685	517	630	577	604	327	646	537	407
ng2	FBgn0010294	0	0	0	0	0	0	0	0	0	0	0	0	0	0	1	0	0	1	0	0	0	0	0	0	0	0	0	0	0	0
ng3	FBgn0010295	0	1	0	2	0	0	0	0	0	0	0	0	0	0	0	0	0	0	0	0	0	0	0	0	0	0	0	0	0	0
ng4	FBgn0010296	0	0	0	0	0	0	0	1	0	0	0	0	0	1	0	0	0	0	0	0	0	0	0	0	0	0	0	0	0	0
brat	FBgn0010300	1589	1544	1378	1267	1730	1796	2029	2119	1399	2254	1964	1837	1012	2309	1555	1934	1459	1934	1411	2494	1948	2266	1940	2386	1511	1540	1394	1787	1966	1743
hep	FBgn0010303	2291	2154	2101	2189	2257	2424	2790	2727	2031	2761	2944	2639	1738	3175	2010	2594	2219	3122	1785	3015	3094	3084	2392	3202	2018	2240	1682	3086	2549	1900
pigeon	FBgn0010309	718	729	638	644	790	724	913	865	689	969	842	902	592	1279	609	993	720	998	523	1132	958	1163	744	1143	679	758	510	1013	940	697
corto	FBgn0010313	2915	2854	2832	2862	3644	3560	3883	3574	2964	3748	3768	3796	2075	4659	2819	3750	2780	4093	2524	4223	3999	4265	3541	5100	3124	3450	2296	4372	3140	3098
Cks30A	FBgn0010314	4	15	12	31	14	31	17	13	16	36	26	10	12	22	9	29	16	32	8	51	17	39	10	24	7	15	5	30	35	11
CycD	FBgn0010315	305	312	324	326	371	322	371	300	319	376	417	372	305	396	298	356	314	418	334	391	453	349	350	385	326	385	213	434	364	308
dap	FBgn0010316	352	372	395	366	474	392	373	385	380	448	505	449	346	469	457	446	484	563	335	493	617	534	464	537	470	408	256	656	462	384
CycJ	FBgn0010317	39	33	34	37	44	46	47	53	41	52	34	53	24	47	31	38	28	42	30	45	42	53	62	70	41	32	36	50	35	21
Gsc	FBgn0010323	29	25	25	26	31	25	37	37	36	36	38	41	23	49	32	28	17	31	22	36	44	32	31	54	23	26	23	23	36	30
woc	FBgn0010328	1875	1940	1790	1895	2047	1988	2306	2075	1708	2399	2390	2231	1425	2589	1551	2052	1939	2416	1497	2484	2743	2690	2028	2524	1590	1818	1308	2288	2007	1601
Tbh	FBgn0010329	842	794	738	785	1053	926	1033	1118	709	1039	1006	940	476	1233	620	948	727	787	580	1253	1061	1228	866	1220	739	757	705	1044	969	810
Rac1	FBgn0010333	1307	1459	1294	1405	1508	1412	1959	1683	1425	1895	1952	2079	1149	2165	1379	1613	1611	2181	1467	2006	2068	2134	1511	2120	1423	1565	983	1834	1792	1647
128up	FBgn0010339	812	814	760	831	888	789	1025	756	818	1189	965	1105	759	1094	704	860	767	1073	777	1050	1196	1271	903	1139	842	967	552	1033	841	640
140up	FBgn0010340	274	285	283	308	300	272	317	311	239	379	359	334	274	386	276	378	284	395	243	359	360	365	263	364	262	298	186	365	335	277
Cdc42	FBgn0010341	2501	2568	2336	2525	2779	2558	3055	2534	2282	3200	3387	3113	2437	3425	2615	3051	2503	3313	2551	3630	3752	3399	2677	3505	2611	2773	1877	3518	2983	2488
Map60	FBgn0010342	391	388	330	399	460	438	484	418	370	512	599	502	344	682	334	477	432	553	336	569	540	581	362	570	369	374	281	539	498	351
Arf79F	FBgn0010348	8918	9677	8367	8809	10003	9043	10509	8236	8745	11703	11799	11326	6621	12255	8221	10033	8129	11761	8627	11023	12270	11106	9131	11316	8578	8790	5924	11079	9611	9138
CdsA	FBgn0010350	16792	16519	15575	15352	17934	16250	21503	19308	16302	22684	23143	22533	14504	26589	16037	20248	17900	24319	15776	24281	24312	23949	19779	25802	19169	19801	12430	24389	20367	18694
Nc73EF	FBgn0010352	30281	29243	26260	25053	28897	26627	40672	36681	28363	37444	36144	34394	20277	42695	23533	34967	25081	41470	20761	40064	39736	40406	30280	40861	24190	26418	20033	36971	30067	26296
Taf1	FBgn0010355	2375	2345	2226	2386	2570	2665	2957	2533	2339	3302	3031	2818	1886	3025	1985	2548	2258	2906	1777	2830	3350	3108	2548	3117	2184	2505	1686	3158	2854	2228
Taf5	FBgn0010356	509	477	479	496	578	489	610	563	438	674	730	616	535	825	465	586	530	690	408	730	671	720	496	631	457	486	385	640	596	444
betaTry	FBgn0010357	25	520	36	157	7	38	236	421	70	0	2229	368	7	14	9	579	9	20	290	1523	8	37	1679	43	165	460	1468	373	301	70
deltaTry	FBgn0010358	0	0	0	0	0	0	1	0	0	0	4	2	0	0	0	0	0	0	1	1	1	0	4	0	2	1	1	1	1	1
gammaTry	FBgn0010359	0	0	0	0	0	0	0	0	0	0	0	0	0	0	0	0	0	0	0	0	0	0	0	0	0	0	0	0	0	0
Akt1	FBgn0010379	2251	2281	2304	2243	2696	2474	2617	2255	2194	2892	3078	2866	2101	3150	2568	2647	2658	3427	2316	2902	3214	2987	2550	3143	2642	2683	1654	3240	2740	2366
AP-1-2beta	FBgn0010380	4368	4258	3948	4086	4789	4558	5165	4724	3896	5525	5336	5353	3613	6145	3577	5063	4017	5071	3191	5792	5750	5904	4236	5964	3828	4373	3065	5115	4926	3839
CycE	FBgn0010382	68	89	65	51	57	47	85	88	81	112	166	77	36	119	46	81	58	79	60	125	66	108	71	93	55	63	38	73	113	55
Cyp18a1	FBgn0010383	829	762	874	829	844	896	922	776	818	822	1220	1080	693	983	651	1184	873	1647	571	1116	1149	1470	918	1098	811	1191	525	1661	1325	949
Def	FBgn0010385	1371	672	722	468	982	940	479	44	284	228	607	489	178	141	1035	204	228	192	1028	222	638	34	867	202	642	470	147	66	899	197
Dbi	FBgn0010387	3389	3463	2957	3236	3390	3118	2732	1656	2493	2940	3517	3053	2094	2499	1709	2034	1444	2226	2046	2337	3113	2236	2386	2137	2398	2709	2423	2750	3337	1994
Dro	FBgn0010388	419	285	1694	500	1694	723	757	225	751	518	467	837	884	127	3283	332	743	494	1851	3351	1874	567	213	1374	2164	932	469	67	910	1362
htl	FBgn0010389	888	1037	896	934	1079	965	1145	1029	840	1213	1216	1213	754	1388	852	1175	1076	1426	857	1351	1345	1313	1014	1364	953	981	707	1485	1040	896
Gtp-bp	FBgn0010391	2108	2471	2279	2638	2380	2246	2537	1979	2056	3156	2800	3109	2755	3476	2002	2555	2236	2984	1836	2923	3199	3323	2306	3104	2117	2697	1530	2700	2275	1939
Itgbn	FBgn0010395	31	68	68	48	39	40	57	84	48	43	88	65	64	49	68	51	70	74	42	57	72	96	62	71	57	89	48	72	91	67
LamC	FBgn0010397	1904	1709	1852	1982	2135	1886	2292	1863	1773	2491	2715	2470	1566	2377	1621	1999	1764	2423	1702	2683	2663	2396	1737	2179	1602	1910	1342	2503	2171	1599
Lrr47	FBgn0010398	127	115	102	111	121	87	143	132	114	127	161	156	132	204	116	170	128	148	109	154	176	209	143	184	123	146	105	172	132	131
Nmdar1	FBgn0010399	1290	1233	1148	1110	1446	1404	1586	1662	1223	1809	1641	1614	1011	2130	1110	1693	1252	1641	974	2028	1638	1919	1359	2046	1096	1115	995	1576	1498	1279
Os-C	FBgn0010401	5849	6254	5531	6219	6375	6004	6707	6287	5203	7169	6765	7066	5234	8380	4898	8531	6662	11025	4254	9381	8615	8227	5979	8748	4940	5955	3727	9695	6778	5578
Obp83b	FBgn0010403	4245	4708	4940	5352	5503	5208	5322	4947	4777	6254	6635	6330	4382	5820	3860	5685	4662	6955	4251	6586	6771	6149	4884	6416	5293	5531	3774	8837	6148	4991
RNaseX25	FBgn0010406	1773	1802	1677	1737	2115	1851	2100	1770	1642	2336	2415	2191	1796	2718	1803	2325	2233	2867	1642	2530	2567	2729	2173	2810	1929	2252	1228	2848	2189	1818
Ror	FBgn0010407	224	232	203	198	260	208	271	259	196	277	250	295	187	357	213	274	243	303	242	317	331	314	214	275	228	164	154	282	248	208
RpS9	FBgn0010408	11584	11600	12905	11898	11616	10708	11758	8701	11395	14314	15700	14347	17332	13544	10667	12307	11775	14791	9198	11955	15700	13578	12993	13606	12708	14949	10140	16439	14511	8430
RpL18A	FBgn0010409	23026	22563	24166	25175	24928	22847	25015	19020	23971	28191	32947	30710	28416	27166	20179	25518	24271	32548	19134	28105	33506	29419	26575	29623	24263	29372	17222	36493	26564	17444
RpS18	FBgn0010411	26346	25263	29249	28794	28519	26292	27405	21020	25542	31889	35729	32910	33353	29942	23164	28509	27211	35211	21706	30089	37756	33000	29440	32025	27766	32861	19603	39027	30572	19243
RpS19a	FBgn0010412	16928	15849	17460	18374	16993	15480	17793	13555	16786	20251	22573	22013	19439	19294	15026	17844	17352	22404	14420	21727	23662	21021	17913	20421	16180	19610	10623	23556	16597	11323
SerT	FBgn0010414	1028	1017	958	1108	1200	1152	1285	1289	1149	1433	1456	1456	970	1623	868	1503	1162	1819	769	1609	1400	1571	1087	1855	879	1192	750	1660	1216	898
Sdc	FBgn0010415	7088	7217	6654	7313	8382	7600	9187	7757	7076	9137	9561	9097	5195	10324	7508	8826	7374	10026	7434	10668	10642	10012	7996	10752	8129	7998	5268	10002	8956	8467
TH1	FBgn0010416	692	727	730	764	856	778	834	654	739	978	1036	966	740	945	702	871	771	918	643	919	1098	1020	777	1016	754	826	506	1005	854	686
Taf6	FBgn0010417	642	547	621	638	677	640	786	664	554	775	863	769	779	913	647	848	674	919	590	903	915	865	665	862	643	745	508	989	792	522
TfIIFbeta	FBgn0010421	265	256	259	279	285	232	311	245	224	365	350	315	252	432	239	309	279	346	217	343	382	367	247	331	235	260	195	335	353	235
TfIIS	FBgn0010422	912	920	830	884	955	898	1152	956	797	1175	1185	1193	917	1328	898	1082	945	1237	857	1302	1207	1218	959	1224	925	931	603	1214	1102	814
TpnC47D	FBgn0010423	8	14	10	9	7	5	21	19	6	14	22	17	6	20	9	9	7	8	7	12	18	12	32	11	17	11	14	9	21	12
TpnC73F	FBgn0010424	140	141	144	164	118	132	191	145	124	171	216	228	120	198	146	160	143	240	157	245	200	197	267	203	178	231	128	226	181	139
epsilonTry	FBgn0010425	3	32	0	7	5	2	10	30	11	0	161	29	0	4	1	132	1	7	21	195	0	16	90	10	12	34	82	19	30	2
mtrm	FBgn0010431	8	1	3	5	5	5	2	8	11	6	89	0	2	4	4	2	11	0	4	5	1	7	1	7	0	3	1	1	79	2
ato	FBgn0010433	5	5	3	7	4	8	2	6	9	6	3	7	4	10	4	5	3	3	0	4	5	4	3	6	6	6	3	10	6	1
cora	FBgn0010434	10571	10889	10198	10280	12022	11682	14152	11427	10025	13590	14462	13689	7889	14481	9636	12672	11170	15148	8420	14090	16725	15705	10944	15032	10101	11406	8578	15486	13004	9994
emp	FBgn0010435	12712	12757	12025	12939	15865	14436	14818	11972	12243	14982	18095	15934	8267	17143	8988	14127	11087	17228	9144	15749	17456	16028	13383	15911	11843	13335	9677	20601	16534	12153
mtSSB	FBgn0010438	24	33	31	25	40	27	36	27	27	29	34	40	20	53	23	26	29	37	19	48	57	52	24	58	25	32	17	37	41	27
pll	FBgn0010441	420	403	367	425	485	387	490	358	389	506	550	541	449	578	408	511	461	506	379	557	672	559	437	549	442	507	235	589	447	329
trn	FBgn0010452	814	783	594	696	828	784	1028	879	713	988	984	1072	521	1179	639	1069	711	1076	628	1127	1025	1172	770	1087	698	725	528	991	897	798
Wnt4	FBgn0010453	194	208	140	185	232	211	248	214	196	253	248	221	126	298	195	244	164	235	177	295	228	283	217	285	202	159	140	254	251	204
Fkbp14	FBgn0010470	4320	4954	4716	5100	5188	4724	4365	2971	3551	4424	6168	5377	3579	5048	3225	3519	3117	4215	3881	3930	5582	4096	3230	3724	3059	3204	3158	4057	4445	3709
tutl	FBgn0010473	6432	6407	5923	6252	7769	9197	8374	10286	5932	9435	8406	8140	3712	10745	5625	9915	6141	9758	4644	10971	8027	10382	7596	11046	6602	6619	6242	8712	9015	7645
l(2)01289	FBgn0010482	2836	3111	2874	2848	3603	3128	3933	3678	3024	4079	3877	3625	1863	4793	2755	4037	2697	4793	2671	4553	4567	4734	2750	3981	2848	3011	2424	4090	3580	3156
NAT1	FBgn0010488	13636	13351	12702	12573	14434	14234	16408	14697	12641	17627	17347	16037	9463	18789	11959	15370	13254	17780	10503	18679	19567	19584	14463	19554	13087	14322	9648	18165	15331	12702
dmGlut	FBgn0010497	572	735	396	482	445	448	559	490	408	518	628	532	284	589	402	542	466	681	357	613	631	742	481	709	514	740	459	831	674	535
Dcp-1	FBgn0010501	185	203	169	163	183	183	244	203	155	266	197	203	120	209	130	193	152	208	154	263	215	195	162	221	133	178	190	273	192	179
kermit	FBgn0010504	133	160	137	143	155	150	196	149	132	174	175	179	110	255	139	179	148	208	135	237	194	212	165	201	125	200	106	199	156	151
wal	FBgn0010516	8448	8517	8608	9339	8998	8115	9118	5932	8223	10705	9899	9679	8141	9867	6477	7385	6307	8544	6937	8642	11268	9014	8379	8463	7701	9462	5941	10310	8823	6566
Bka	FBgn0010520	207	202	186	223	218	149	249	202	203	256	227	263	178	266	173	268	189	313	199	319	331	344	243	295	179	250	118	301	203	137
Ccs	FBgn0010531	374	387	345	372	390	339	441	310	321	509	461	501	372	514	298	422	328	489	308	435	466	480	363	492	328	383	264	518	414	315
Aldh-III	FBgn0010548	6671	6694	6006	6600	7550	6746	7851	5959	6373	8720	8805	8151	6130	9266	5463	6745	6202	7642	5480	7796	9080	7680	6373	8077	5637	6673	4823	8355	7766	5527
l(2)03659	FBgn0010549	12	11	12	19	21	21	13	10	3	11	10	8	17	22	6	19	12	20	6	7	7	17	10	21	15	15	5	9	15	13
Phb2	FBgn0010551	3599	4024	3342	3791	3663	3548	4498	3301	3714	5164	4454	4564	3721	5230	3663	4318	3725	5110	3274	4836	5136	5169	3722	4655	3208	4050	2437	4184	3613	3097
sbb	FBgn0010575	4720	4229	4192	3687	4888	5233	5553	5181	4363	5729	5687	5346	2847	6208	3526	5148	4325	5296	2728	5630	6082	6498	4986	6386	4019	4637	3682	5385	5515	3889
dock	FBgn0010583	2189	1976	2001	2062	2229	2137	2847	2546	1962	2748	2787	2656	1567	3328	1987	2664	2163	2897	1945	2968	2959	2911	2409	3100	1970	2055	1666	2854	2506	2058
Prosbeta1	FBgn0010590	1367	1435	1377	1587	1540	1346	1506	1202	1285	1660	1676	1732	1632	1958	1174	1579	1398	1816	1142	1563	1911	1727	1354	1794	1242	1513	1133	1800	1524	1091
Sply	FBgn0010591	3067	3262	2800	3238	3732	2976	3181	2317	2724	3810	3672	3487	2407	3737	2549	2958	2560	3325	2607	3649	4212	3999	2568	3463	2514	2816	1882	3123	3174	2478
lwr	FBgn0010602	1662	1762	1557	1692	1722	1769	2032	1635	1725	2140	2249	2277	1566	2493	1477	2050	1546	2347	1453	2544	2386	2335	1691	2480	1470	1674	1294	2169	1892	1555
l(2)05714	FBgn0010607	250	255	257	297	351	245	341	285	253	381	371	407	300	456	269	348	329	420	321	482	371	526	313	437	288	350	171	409	320	246
Hmgs	FBgn0010611	2477	2140	2241	2206	2422	2170	2993	2083	2592	2831	2491	2763	2135	2951	2605	2739	2450	2935	2488	3075	3874	3168	2457	2855	2342	2781	1526	2395	2415	1839
ATPsynG	FBgn0010612	6661	7166	7549	7332	7333	6604	8727	6558	6983	9164	8283	8866	9509	10594	5878	9022	5906	10105	5610	9733	8641	8912	6432	9181	6151	6854	6574	8701	7785	5562
CG10939	FBgn0010620	1860	2132	1858	2211	2653	2390	2507	2213	1848	2532	2806	2439	2019	3200	1816	2575	2473	3523	1740	2956	2900	2797	2115	2892	2215	2365	1501	3431	2731	2192
Cct5	FBgn0010621	1754	1699	1738	1803	1754	1564	2259	1638	1797	2781	2142	2488	1800	2641	1756	2232	1791	2458	1825	2909	2827	3274	1807	2620	1803	2344	1134	2227	1836	1372
DCTN3-p24	FBgn0010622	532	548	533	617	594	507	639	553	540	710	701	704	623	765	452	672	559	768	509	812	759	762	565	787	441	535	418	809	622	479
Sec61beta	FBgn0010638	2974	3604	2708	3158	2997	2659	3140	2214	2756	4031	3741	4181	2177	4455	2048	2957	2111	3622	2735	4114	3548	3627	2496	3466	2259	2703	2006	2718	2488	2585
MFS14	FBgn0010651	3012	2307	1759	2379	2819	2201	3199	2122	2034	2512	3316	2846	1721	2536	1628	2023	2091	2268	2170	2468	2856	2271	2332	2599	1943	2557	2244	4033	2728	1877
Nup214	FBgn0010660	721	783	691	807	897	831	993	914	720	1119	1217	1162	609	1344	709	945	1007	1142	638	1106	1178	1220	870	1103	704	895	567	1110	914	735
l(3)01239	FBgn0010741	741	799	813	848	826	781	946	800	713	1062	1019	984	1086	1284	909	1090	952	1293	849	1125	1131	1173	836	1173	928	1022	583	1177	849	709
Srp54k	FBgn0010747	2327	2438	2181	2391	2243	2166	2648	2056	2144	2968	2837	2926	1804	3020	1863	2522	1908	2749	1814	2681	3216	2949	2119	2783	2113	2390	1568	2794	2334	2105
atms	FBgn0010750	627	642	570	646	609	670	772	634	680	858	862	933	737	977	645	756	655	828	515	942	900	981	649	894	603	683	503	892	786	571
simj	FBgn0010762	1477	1414	1464	1521	1773	1843	1956	1948	1505	2141	2085	1958	1200	2294	1547	1835	1778	2004	1386	2487	2039	2150	1729	2195	1567	1707	1289	2007	1940	1455
sqz	FBgn0010768	422	406	353	355	479	464	489	501	373	562	521	502	306	643	367	571	459	614	297	640	518	601	413	644	353	387	293	597	481	421
ppan	FBgn0010770	311	263	227	268	276	273	301	288	248	373	268	337	226	335	274	301	302	387	242	383	392	481	333	382	293	324	148	347	284	254
Xe7	FBgn0010772	3755	3538	3704	3994	4306	4567	4979	5017	3655	5073	4769	4574	3111	5832	3849	5163	4139	5716	3304	5379	5777	5607	4528	5658	3556	3829	2817	5464	4627	3716
Ref1	FBgn0010774	1914	1665	1705	1856	2221	2057	2519	2192	1653	2290	2148	2328	1766	2851	1870	2400	1911	2855	1696	2569	2436	2531	1935	2962	2097	2314	1348	2573	1800	1403
l(3)02640	FBgn0010786	2206	2500	2134	2344	2663	2237	2707	2429	2098	3082	2733	2680	2193	3550	2108	2794	2185	2915	1646	2882	2741	2785	1958	2947	2131	2278	2285	3421	2281	1702
TrpRS	FBgn0010803	669	708	643	668	732	643	825	675	636	967	827	902	720	1091	652	818	755	932	661	950	970	997	695	988	622	745	471	915	746	688
l(3)03670	FBgn0010808	2478	2730	2298	2636	2542	2306	3274	2734	2433	3626	3133	3217	2644	3868	2288	3576	2366	4236	2016	3717	3239	3672	2444	3792	2190	2561	1846	3438	2748	2311
unc-45	FBgn0010812	707	733	691	756	788	745	978	846	718	950	985	910	633	1062	790	929	779	930	769	1058	1130	1067	765	1024	712	820	491	928	843	678
Gug	FBgn0010825	4245	3930	3817	3643	4687	4815	5298	5057	4033	5512	5317	4852	2698	5972	3488	5192	4082	5489	2814	5649	5673	6094	4663	6004	3830	4354	3324	5647	5028	3765
l(3)04053	FBgn0010830	450	442	496	500	566	514	641	531	508	610	664	628	536	708	442	595	540	695	398	676	708	714	514	721	452	572	551	897	672	413
l(3)05822	FBgn0010877	1651	1638	1622	1641	1891	1849	2019	1920	1568	1979	2156	2016	1370	2327	1639	2052	1813	2458	1415	2287	2396	2397	1776	2495	1729	1815	1271	2526	2057	1508
sinu	FBgn0010894	592	669	566	652	746	710	902	795	601	886	933	900	712	1092	793	898	779	1078	688	1026	991	913	749	1007	734	750	453	990	779	777
Spn	FBgn0010905	4212	4121	3934	3798	4555	4913	5792	5544	4196	5625	5794	5291	2790	6398	3737	5016	4289	5367	3066	5579	5780	5918	4858	6321	4012	4122	3619	5624	5108	4239
msn	FBgn0010909	5152	5147	5016	5033	5780	5907	6264	5537	4852	6335	6832	6144	4555	6810	5505	5796	5618	6656	4889	6550	7364	6505	5452	6950	5599	6043	3681	6928	6092	5034
l(3)07882	FBgn0010926	413	447	461	448	510	498	525	426	430	598	593	581	329	582	430	572	482	587	438	654	661	689	548	710	533	565	272	667	468	412
SsRbeta	FBgn0011016	2756	3292	2821	3172	2859	2553	2867	2071	2515	3718	3689	3937	1601	3451	1797	2528	1685	2785	2381	2832	3096	3095	2234	2927	2014	2387	1948	2268	2521	2684
Sas-4	FBgn0011020	95	104	89	84	111	108	142	113	92	176	132	149	94	186	96	144	110	150	98	166	120	183	99	170	90	145	51	145	128	104
dia	FBgn0011202	1033	1095	942	1011	1075	1006	1354	1219	1130	1322	1410	1272	1175	1792	1049	1291	963	1291	1149	1619	1782	1687	1304	1562	950	988	824	1647	1321	1063
cue	FBgn0011204	2482	2097	2164	2143	2505	2325	3087	2375	2122	2729	2353	2302	1465	2906	1936	2431	2147	3429	1937	3101	3815	3326	2427	3077	2070	2042	1601	4035	2499	1701
fbl	FBgn0011205	1183	1019	938	1000	1140	1045	1378	1026	1124	1223	1307	1152	874	1253	990	1022	956	1161	1027	1283	1607	1226	1101	1210	943	1148	830	1311	1238	893
bol	FBgn0011206	3758	3906	3767	3613	4649	4865	5025	5797	3784	5559	4869	4952	2192	6706	3619	5653	3773	5627	3093	6805	5351	6783	5040	6934	4569	4657	3862	5038	4767	5065
pelo	FBgn0011207	956	893	801	878	1002	840	1136	902	863	1200	1153	1191	635	1170	818	1059	802	1074	814	1110	1297	1244	968	1174	840	1038	610	1196	930	811
blw	FBgn0011211	57599	62010	50082	54912	58596	54888	74276	64170	54488	78343	69822	72197	34517	84307	39195	74737	42922	87158	35950	82537	70378	87632	49702	79583	39360	49074	37801	64007	56085	49246
eff	FBgn0011217	8352	8612	7988	8495	9776	8844	10393	8541	8237	11291	11530	11535	6647	12928	7981	10647	8445	12567	8062	12324	11735	11909	8504	11818	7818	9028	5426	11334	9517	8122
heph	FBgn0011224	4233	4169	3679	3682	4722	5124	5228	5621	4234	5697	5321	5203	2530	6499	4304	6103	3790	5556	3842	6489	5530	6007	5046	6639	4807	4424	3540	4683	4964	5221
jar	FBgn0011225	10215	9693	9292	9399	10636	10165	11993	11366	9422	13151	13890	12178	8267	13506	8855	11299	9967	12710	7746	12934	13237	12863	10367	13182	9777	10662	7310	13284	11657	9003
ox	FBgn0011227	2096	2194	2093	2242	2387	2091	2634	2221	1890	2700	2718	2630	1648	3087	1903	2886	1738	3362	1930	2913	2691	2688	1889	2649	1754	1860	1456	2568	2136	2016
poe	FBgn0011230	12547	11734	11762	10378	13545	14505	14970	13193	11493	15141	15886	13252	7525	14988	9029	13449	10433	14181	7331	13049	15112	15146	13024	15504	11197	13267	9754	15207	14174	11496
scat	FBgn0011232	741	875	812	909	971	895	1170	1054	811	1217	1230	1182	841	1394	799	1114	930	1352	695	1209	1190	1231	922	1265	928	1004	642	1290	1004	874
ken	FBgn0011236	743	787	703	722	866	751	831	830	755	895	944	844	605	979	624	898	786	1188	561	1083	1086	1037	754	1142	718	760	542	1133	920	698
ms(2)35Ci	FBgn0011239	0	0	0	0	0	1	0	0	0	0	0	0	0	0	0	0	0	0	0	0	0	0	0	0	0	0	1	0	0	0
cbx	FBgn0011241	557	530	512	484	505	406	575	494	471	588	689	666	528	650	421	585	514	703	542	645	752	609	573	637	509	551	409	639	631	432
Hsp60B	FBgn0011244	3	2	5	7	1	4	2	4	2	3	3	4	0	2	2	5	3	5	2	1	3	0	3	3	2	0	2	1	2	1
Sema-1a	FBgn0011259	2457	2464	2440	2252	2705	3116	3174	3513	2381	3457	3280	3066	1431	3604	2362	3392	2085	3037	1927	3481	3311	3748	3144	4091	2909	2763	2349	3006	3092	3219
Sema-2a	FBgn0011260	1886	1723	1787	1744	2183	1970	1950	1744	1554	2143	2604	2486	1244	2619	1772	1932	1623	2170	1620	2306	2708	2450	1969	2363	2013	2112	1282	2189	2157	2046
Pglym87	FBgn0011270	2	1	1	1	0	1	1	1	1	0	0	0	0	3	1	1	0	4	1	1	0	0	3	0	1	4	0	0	0	0
RpL13	FBgn0011272	27330	25875	30124	30509	29603	27478	30633	23342	28158	32891	38392	36682	35403	33273	26060	30109	30321	37364	22902	33725	38588	35228	31250	34713	30607	35395	21494	42236	31325	20377
Acam	FBgn0011273	0	0	0	0	0	0	0	0	0	0	0	0	0	0	0	0	0	0	0	0	0	0	0	0	0	0	0	0	0	0
Dif	FBgn0011274	3146	3062	3144	3369	3943	3773	3310	2918	2801	3856	4528	3774	2841	4126	3019	3803	3662	4539	2632	3885	4449	3916	3261	4187	3421	3718	2487	4949	4153	2818
HLH3B	FBgn0011276	20	21	27	19	26	31	22	22	18	21	30	23	28	42	24	35	17	33	19	46	32	39	34	32	20	25	17	34	36	32
HLH4C	FBgn0011277	6	9	14	17	13	13	18	12	9	19	16	14	16	17	17	21	14	20	9	16	13	21	7	16	10	13	7	19	13	10
lbe	FBgn0011278	0	2	4	6	3	4	3	1	1	1	2	2	1	3	0	3	1	4	1	3	2	3	4	4	3	4	1	3	4	3
Obp69a	FBgn0011279	589	749	843	826	775	729	814	842	776	978	963	950	532	789	638	904	813	1289	686	880	1076	971	708	998	671	700	529	1058	680	672
Obp19d	FBgn0011280	39543	41055	40636	46372	45571	44371	57743	44799	42288	53099	64099	60926	34969	57905	36704	64060	39560	66212	36164	69556	64367	59088	47861	65911	37406	45588	26564	66322	54230	37773
Obp83a	FBgn0011281	8095	8739	8337	8976	8405	7959	9486	8964	7514	10226	9710	9943	7684	10928	6474	11288	8542	13791	5543	11889	10054	11171	7725	11943	7185	8672	5681	13565	8466	7119
Obp84a	FBgn0011282	31	32	14	28	25	19	34	32	13	31	37	30	26	33	25	51	26	32	16	27	29	36	42	40	19	39	11	54	39	28
Obp28a	FBgn0011283	3408	3516	3555	4357	3629	3923	4583	4135	3791	5010	4945	5110	4142	6151	2188	5034	4341	8248	2151	5883	3767	4160	3541	6338	2831	3849	2715	7265	4525	2973
RpS4	FBgn0011284	37009	36155	40152	41851	40217	37507	38614	30217	37884	46714	52518	49496	43640	42769	33018	41519	39182	50910	30994	45195	54934	48233	41141	45937	39630	47701	28473	58258	43725	28385
RyR	FBgn0011286	7388	7925	7623	6929	8837	9801	10546	10595	7533	10776	9073	8617	4454	11591	5739	10812	5659	10980	4304	9772	10393	11647	7399	10761	5879	6751	6916	9426	8063	7310
Snap25	FBgn0011288	5594	5475	5543	6030	7811	7228	7343	7437	5706	8039	7851	7403	3309	9070	6444	8122	5707	7750	6222	9368	8081	8653	7366	9931	7020	6206	5259	7273	7944	8174
TfIIA-L	FBgn0011289	1522	1581	1645	1784	1942	1862	1965	1570	1608	2312	2602	2150	1748	2325	1576	1908	1777	2454	1370	2320	2279	2177	1784	2255	1626	1805	1177	2448	2020	1380
Taf12	FBgn0011290	896	894	795	842	966	884	1079	884	826	1155	1154	1126	781	1344	791	1171	916	1152	734	1343	1230	1229	871	1297	776	899	605	1251	1044	715
Taf11	FBgn0011291	189	180	186	201	222	189	228	182	185	260	248	239	171	307	145	254	174	311	175	311	251	237	235	251	171	178	149	297	216	189
a10	FBgn0011293	5860	6258	5681	6256	6343	6059	6463	5615	5787	7564	7520	7200	6126	7670	4729	7589	6587	10012	4836	8248	8119	7070	5887	8278	4786	5718	3647	8868	6904	5571
a5	FBgn0011294	1148	1253	1131	1255	1010	994	1572	1556	1172	1537	1875	1843	1370	2013	1316	2153	1543	2589	1196	2228	1783	1679	1367	2141	1254	1278	651	1895	1314	1176
l(2)efl	FBgn0011296	1312	1006	1620	1340	1613	1391	1724	1232	1601	1441	1650	1743	938	1980	1304	1652	1025	2638	1216	2300	1954	1794	1267	2183	1737	2109	1128	1690	2005	965
l(2)not	FBgn0011297	424	409	452	447	451	434	478	382	419	535	570	510	541	545	419	431	450	586	404	510	609	541	477	564	439	456	289	587	448	332
babo	FBgn0011300	2433	2317	2298	2371	2731	2752	2858	2770	2236	2975	3253	2787	1784	3300	2445	2982	2488	3393	2266	3100	3433	3328	2765	3474	2595	2620	1898	3104	2748	2600
Rsf1	FBgn0011305	1678	1695	1658	1809	1964	1889	2170	1969	1668	2225	2333	2285	1711	2780	1764	2408	2002	2670	1692	2798	2407	2521	1951	2710	1766	1899	1261	2515	1897	1671
Uch-L5	FBgn0011327	447	459	351	465	487	411	455	407	410	641	542	515	411	552	426	512	378	554	406	571	565	519	376	545	404	472	317	566	508	485
l(3)j2D3	FBgn0011335	424	395	393	409	471	439	502	420	422	578	570	545	382	709	384	474	479	631	439	595	584	569	440	615	393	383	275	540	468	456
OstStt3	FBgn0011336	3097	3559	2991	3594	3323	3120	3428	2659	2889	4280	4148	4350	2363	4304	2362	3311	2588	3858	2445	3436	4206	4095	2898	4060	2362	3002	2103	3418	3156	2852
ND-ACP	FBgn0011361	4724	5048	4604	4943	5068	4666	6289	4968	4823	6491	6074	6331	3825	7239	3674	6664	3880	7904	3797	7407	6095	7022	4482	6663	3852	4587	3440	5845	5248	4286
ND-SGDH	FBgn0011455	4736	5029	4828	5367	5545	4945	6614	5368	4930	6738	6331	6289	5592	7920	4645	7118	4849	8063	4447	7750	6731	7189	5220	7166	4767	5634	3960	7344	5644	4777
Set8	FBgn0011474	655	670	567	590	741	701	765	737	596	785	779	726	417	884	559	843	681	917	522	832	847	931	641	914	607	687	457	871	765	705
l(3)neo43	FBgn0011476	253	222	254	264	276	210	296	241	239	364	307	318	247	339	254	310	232	335	201	307	355	344	246	303	228	265	165	331	245	234
Ssdp	FBgn0011481	2761	2635	2665	2594	3544	3324	3575	3413	2899	3867	3820	3611	1964	3947	2881	3404	3019	3581	2619	4005	4042	4025	3363	4460	2986	3001	2254	3882	3308	2960
SrpRbeta	FBgn0011509	541	680	590	611	650	615	585	540	602	844	785	776	582	904	543	761	649	837	550	808	888	891	724	941	689	784	467	852	674	652
etaTry	FBgn0011554	3	0	1	0	0	0	0	0	0	0	6	0	0	0	1	0	0	0	0	0	0	0	2	0	1	0	6	0	0	1
thetaTry	FBgn0011555	0	0	0	0	1	2	0	0	6	0	1	0	0	0	0	0	0	0	0	0	0	0	0	1	2	5	1	0	5	212
zetaTry	FBgn0011556	0	0	0	0	0	0	0	0	3	0	0	0	1	0	1	0	0	0	0	0	0	0	0	0	1	1	0	0	2	0
Acp36DE	FBgn0011559	1	2	1	0	0	1	2	1	2	3	3	5	0	1	0	5	1	3	0	3	2	1	0	1	1	1	2	1	1	3
Smyd3	FBgn0011566	384	388	408	417	438	376	558	432	458	666	585	669	441	792	397	558	404	714	365	696	545	692	439	603	361	495	284	517	466	297
can	FBgn0011569	3	3	2	5	4	15	5	3	3	8	3	0	2	7	5	2	3	3	3	3	7	5	3	1	3	2	4	5	7	5
cpb	FBgn0011570	803	879	830	965	958	918	1071	935	816	1168	1228	1161	834	1341	910	1119	867	1223	783	1361	1230	1268	882	1259	844	953	627	1240	972	933
caz	FBgn0011571	1678	1617	1405	1700	1752	1653	1858	1749	1364	1924	1982	1941	1207	2132	1326	1839	1547	2077	1216	2068	2099	2027	1686	2088	1451	1484	1087	1891	1552	1323
Cdc37	FBgn0011573	916	897	841	893	1006	796	1154	892	797	1292	1031	1247	825	1457	908	1089	924	1101	956	1341	1234	1298	895	1135	823	1058	600	1116	925	777
Cyp4d2	FBgn0011576	0	0	1	0	0	0	0	0	0	1	0	0	0	1	0	0	0	0	0	0	0	0	0	0	0	1	0	0	0	0
Ms	FBgn0011581	3139	3069	3143	3191	4193	3455	4187	3444	3107	3956	4355	4069	2966	4875	3269	3892	3367	4439	3534	4553	4925	3845	3999	4577	3100	2957	2400	4909	4065	3203
Dop1R1	FBgn0011582	1333	1253	1285	1076	1426	1765	1844	1955	1244	1907	1747	1629	750	2012	1161	1755	1076	1669	1032	1972	1760	1933	1626	2248	1339	1285	1239	1366	1579	1575
Trp1	FBgn0011584	5994	6064	5859	6356	6768	5924	6727	5394	5513	7554	7761	7411	4590	7614	5582	6200	5586	7176	5777	7092	8594	7712	6191	7082	5886	6306	3994	7401	6696	5998
e(r)	FBgn0011586	1486	1399	1414	1469	1668	1402	1722	1396	1340	1901	1786	1742	1205	2063	1250	1750	1287	1906	1348	2047	2117	2084	1636	2043	1499	1574	987	2162	1698	1513
Elk	FBgn0011589	952	916	746	836	895	1014	1190	1201	873	1306	1051	1104	607	1384	880	1382	863	1258	783	1440	1230	1354	1046	1530	845	845	657	1034	1030	965
fng	FBgn0011591	1002	1083	981	1029	1174	999	1157	1108	1001	1253	1373	1353	837	1540	919	1311	1063	1596	915	1598	1497	1433	1103	1610	927	1166	855	1571	1147	978
fra	FBgn0011592	837	798	731	771	929	988	1056	957	774	1089	1135	1004	570	1226	730	976	754	1131	681	1064	1158	1167	913	1215	769	835	676	1075	956	851
fzo	FBgn0011596	1	4	3	1	6	6	1	3	7	6	4	9	1	1	4	11	4	9	3	0	5	3	0	7	5	6	6	6	6	6
ine	FBgn0011603	2632	2843	2571	2780	2987	2924	3456	2943	2371	3225	3333	3330	2363	4232	2273	3557	2632	4265	2024	4101	3881	4210	2874	4359	2467	3063	1981	4152	3027	2363
Iswi	FBgn0011604	1099	1078	919	1070	1261	1135	1390	1246	1077	1497	1479	1424	816	1525	967	1296	1276	1459	1011	1447	1667	1570	1175	1624	1057	1192	754	1497	1313	1005
Klp3A	FBgn0011606	79	73	50	71	65	77	84	58	50	80	106	80	61	118	45	74	86	93	48	120	87	108	49	71	77	103	47	102	120	75
La	FBgn0011638	1672	1715	1565	1695	2023	1795	1893	1744	1836	2335	2196	2163	1282	2344	1540	2106	1715	2471	1444	2251	2519	2729	1937	2485	1858	2045	1173	2422	1976	1593
lark	FBgn0011640	1910	1794	1745	1838	2029	1775	2352	1955	1756	2615	2261	2582	1895	2975	1957	2564	1892	2462	1770	3073	2694	2855	1983	2708	1739	2060	1296	2499	1937	1440
Zyx	FBgn0011642	2310	2435	2488	2397	3003	2804	3098	3011	2476	3287	3382	3058	2323	3686	3187	3224	2947	3499	2845	3458	3537	3225	2937	3650	3056	2677	1981	3497	3181	3029
Mad	FBgn0011648	1455	1420	1353	1408	1634	1536	1622	1411	1349	1802	2049	1766	1275	1998	1417	1704	1503	2034	1280	1892	1947	1893	1524	1851	1388	1461	1014	2033	1585	1329
mas	FBgn0011653	1	0	2	2	2	0	0	1	0	1	1	1	0	0	3	0	0	0	0	0	0	1	0	1	0	1	0	0	0	1
Med	FBgn0011655	1111	1050	1032	1181	1264	1201	1436	1245	1054	1520	1588	1447	1105	1695	1046	1269	1226	1536	898	1581	1570	1515	1256	1717	1152	1374	843	1664	1411	992
Mef2	FBgn0011656	3298	3141	2998	3179	3603	3661	4225	4054	3186	4299	4269	4027	2185	4738	3122	4236	3237	4726	2639	4936	4646	4727	3613	4908	3142	3373	2571	4261	3850	3347
Mlh1	FBgn0011659	54	83	66	60	70	69	57	78	67	98	91	95	88	118	75	93	98	120	51	118	95	92	76	125	73	93	49	76	85	55
Pms2	FBgn0011660	233	244	198	200	245	232	227	248	220	274	274	304	217	293	235	314	272	308	173	313	366	329	279	374	212	243	160	336	251	192
Moe	FBgn0011661	12797	12071	11539	11803	13580	12577	15267	12743	11669	15761	15736	15299	9619	17438	11796	14944	12681	17688	11746	18180	17539	16589	13316	17220	12529	13248	8522	17308	13816	11956
msi	FBgn0011666	4043	4375	4182	4014	5107	5323	5586	5881	4248	5880	6202	5692	3222	6744	4770	5853	4981	6691	4056	6241	6196	6604	5720	7535	5443	5457	4014	6390	5495	5850
Mst57Da	FBgn0011668	0	0	0	0	0	0	0	0	0	0	0	0	0	0	0	0	0	0	0	0	0	0	0	0	0	0	0	0	0	0
Mst57Db	FBgn0011669	0	0	0	0	0	0	0	0	0	0	0	0	0	0	0	0	0	0	0	0	0	0	0	0	0	0	0	0	0	0
Mst57Dc	FBgn0011670	0	0	0	0	0	0	0	0	0	0	0	0	0	0	0	0	0	0	0	0	0	0	0	0	0	0	0	0	0	0
Mvl	FBgn0011672	2166	2149	2336	2331	2788	2570	2710	2453	2251	2933	3523	3291	1987	3101	2528	2767	2217	3116	2124	3058	3404	3118	2538	3137	2688	2789	1642	3025	2853	2476
insc	FBgn0011674	260	260	268	246	313	294	253	231	254	296	414	358	295	329	315	318	309	396	202	285	479	398	243	317	288	333	219	394	302	234
Nos	FBgn0011676	984	1011	912	973	1068	1114	1195	1278	895	1307	1268	1157	793	1572	822	1224	1081	1221	685	1399	1313	1379	1099	1464	805	871	751	1325	1272	887
pav	FBgn0011692	1	1	3	6	3	6	0	4	10	1	26	5	6	4	2	3	3	1	2	5	2	3	6	7	4	2	2	0	19	4
Pdh	FBgn0011693	30302	25059	29685	25962	32143	25943	38552	25080	28384	33341	36389	35355	27876	37988	26181	29972	22333	31217	22285	27236	37626	27160	30665	34571	35380	34706	23442	44174	34735	26468
EbpII	FBgn0011694	0	0	1	0	0	0	0	0	0	0	0	0	0	1	0	0	0	0	0	0	0	2	0	0	0	0	0	0	0	0
EbpIII	FBgn0011695	45349	51579	44401	50626	54149	45548	54890	36411	42433	50727	62627	54858	44245	57280	31129	39973	38141	53309	35233	47827	58362	45081	45201	52885	38016	46221	37932	60588	53707	36635
repo	FBgn0011701	1916	1989	1710	1849	2044	1893	2451	2017	1631	2104	2365	2257	1788	2504	1730	2425	2069	2861	1569	2573	2695	2486	1958	2846	1604	1936	1399	2764	2174	1707
RnrL	FBgn0011703	154	225	132	198	146	155	109	150	149	280	253	225	71	185	85	199	87	173	117	221	204	270	135	185	91	134	75	109	192	194
RnrS	FBgn0011704	169	257	255	270	269	269	230	201	267	435	312	311	145	219	103	160	171	204	153	210	283	339	195	290	154	176	132	183	266	187
rost	FBgn0011705	4374	3548	3077	2970	3174	2699	3956	1698	4099	3465	4089	3409	2214	2610	3536	2746	2404	2995	3762	2303	6462	2719	3950	3425	3278	3468	2208	3958	3386	2966
rpr	FBgn0011706	25	46	26	36	36	38	48	29	36	45	45	42	30	68	41	54	38	36	29	69	55	50	40	51	27	36	20	57	45	30
Syx5	FBgn0011708	1768	1844	1566	1731	1873	1630	2087	1678	1703	2624	2306	2502	1488	2756	1559	2127	1867	2483	1662	2621	2486	2558	1691	2494	1483	1860	1129	2295	1990	1578
2016-09-01	FBgn0011710	739	739	774	850	927	872	986	818	694	1030	1091	1007	878	1277	884	930	889	1056	737	1195	1148	988	873	1126	818	939	561	1135	1021	707
Snr1	FBgn0011715	571	582	535	600	643	587	742	584	516	709	774	722	708	852	534	743	646	814	444	807	758	812	586	789	543	641	396	827	679	445
Tig	FBgn0011722	8788	9173	6921	7521	8375	7348	8422	5145	7506	9105	8797	6930	3901	8310	5223	5591	4490	5523	5334	5552	9628	6426	6206	6225	4821	5683	5765	6188	8343	6501
byn	FBgn0011723	16	19	10	16	8	26	17	17	18	23	23	16	19	31	21	26	14	21	13	23	19	26	24	18	19	9	11	22	20	14
twin	FBgn0011725	1553	1719	1535	1717	1913	1725	1973	1821	1586	2178	2264	2126	1510	2452	1533	2075	1758	2359	1460	2280	2292	2282	1739	2487	1554	1702	1271	2447	2023	1483
tsr	FBgn0011726	3101	3387	3377	3532	3780	3301	3861	3079	3055	4135	4445	4129	4047	4467	3565	3907	3478	4378	3666	4083	4562	3765	3238	4322	3518	3490	2434	4103	3869	3337
Wee1	FBgn0011737	854	847	845	845	1019	935	1160	955	793	1147	1131	1175	764	1287	857	1127	1020	1258	804	1275	1276	1253	1014	1401	893	929	717	1234	1082	799
wts	FBgn0011739	2673	2652	2497	2702	3170	3198	3203	3051	2446	3399	3574	3176	1980	4197	2279	3155	2766	3727	1989	3465	3770	3706	2873	3989	2735	3006	2306	4231	3375	2589
alpha-Man-IIa	FBgn0011740	1181	1132	1018	985	1182	1022	1320	1113	1026	1385	1233	1277	986	1499	943	1173	1142	1453	861	1280	1535	1466	1119	1547	909	1027	741	1354	1254	953
Arp6	FBgn0011741	492	559	609	581	595	540	596	446	486	669	652	741	720	775	513	609	607	791	481	646	743	715	499	712	536	626	459	770	586	438
Arp2	FBgn0011742	1593	1674	1364	1576	1681	1515	1918	1679	1393	2047	2051	1948	1268	2136	1406	1760	1564	2035	1431	2160	2129	1945	1704	2102	1302	1418	1180	1902	1693	1398
Arp53D	FBgn0011743	0	1	0	0	1	3	0	1	1	0	0	0	0	0	0	2	0	1	0	1	0	1	1	0	1	0	0	3	1	0
Arp1	FBgn0011745	2283	2450	2388	2389	2556	2258	2793	2423	2188	3084	3066	2869	2606	3349	2277	2890	2482	3385	2084	3102	3320	3115	2244	3159	2267	2502	1761	3284	2659	2070
ana	FBgn0011746	439	424	471	511	557	554	609	569	491	596	570	598	348	738	454	624	470	664	488	779	786	696	551	805	456	529	368	684	559	445
Ank	FBgn0011747	9360	9955	9265	9284	11548	10834	12166	11887	9516	13064	13351	12512	7323	14495	10474	13194	10474	13813	9749	13843	14248	13437	11565	14767	11045	11070	7771	13840	11944	11624
PhKgamma	FBgn0011754	3689	3515	3475	3607	4110	3777	4471	4030	3550	4876	5384	4817	3179	5400	3288	4382	3752	4852	3214	5369	5148	4763	3786	4990	3655	3683	2721	5200	4429	3346
B-H1	FBgn0011758	190	196	164	212	244	236	282	226	197	256	294	247	170	313	205	236	208	297	160	301	288	305	241	320	208	253	163	292	260	202
ctp	FBgn0011760	15364	14902	13263	14278	16644	15026	19712	17027	14847	21286	18989	19962	9161	25489	14655	20684	14374	23224	15016	24576	21510	23555	15992	24181	14833	15756	10076	19084	15920	18153
dhd	FBgn0011761	49	3	3	3	51	2	2	34	119	4	524	1	3	6	9	14	43	5	12	0	3	26	1	40	10	22	14	3	515	7
DNApol-alpha50	FBgn0011762	78	82	82	113	95	81	57	51	77	118	93	86	52	114	79	138	72	104	74	132	84	127	78	104	67	82	43	95	84	72
Dp	FBgn0011763	1721	1824	1640	1848	2152	1872	2080	1992	1726	2338	2403	2222	1461	2509	1743	2178	1954	2472	1636	2525	2537	2424	1929	2493	1845	1946	1242	2496	2024	1669
E2f1	FBgn0011766	2508	2462	2425	2429	2846	2677	3080	2855	2352	3300	3449	3302	1982	3780	2604	2868	2825	3516	2442	3627	3515	3436	2862	3526	2644	2673	1886	3528	2886	2304
Fdh	FBgn0011768	6389	6616	5844	6493	5267	5346	4900	2830	4944	6281	7228	6303	4619	4198	4079	3497	3995	4402	3911	3648	6244	3965	5126	4387	4593	5189	4320	4805	6137	4420
Fdx1	FBgn0011769	184	187	199	168	179	161	189	164	130	229	166	202	165	257	184	211	176	256	183	232	231	225	157	215	159	232	105	240	163	165
Gip	FBgn0011770	3133	3192	2725	2951	2974	2620	2860	1736	2737	3143	4263	3433	2506	3082	1828	2199	1500	2053	2235	2511	2869	1893	2099	2181	2019	2263	2123	2548	3231	2173
Hem	FBgn0011771	1341	1476	1572	1644	1999	1757	1974	1798	1374	2026	1874	1794	1382	2373	1463	1817	1700	2098	1248	1968	2326	2446	1723	2293	1639	1804	1091	2124	2090	1747
Irbp	FBgn0011774	185	202	255	219	255	213	242	222	197	316	358	297	307	343	253	250	341	313	211	312	325	336	248	378	250	272	147	364	258	216
BRWD3	FBgn0011785	2049	2053	1943	2014	2294	2380	2625	2329	1852	2592	2838	2503	1522	2698	1698	2241	2101	2662	1467	2620	2740	2547	2254	2833	1783	2088	1552	2801	2536	1742
mRpL12	FBgn0011787	665	593	560	684	627	593	842	599	559	860	683	845	505	962	523	816	549	860	452	880	889	1015	666	962	525	631	422	811	635	546
Gem3	FBgn0011802	160	161	178	170	258	194	241	157	188	250	290	300	146	296	199	237	260	254	196	258	272	287	220	276	212	226	156	268	250	190
Lcp1Psi	FBgn0011812	1	1	0	0	2	0	0	3	0	4	4	2	1	3	1	3	0	3	1	1	3	3	3	1	2	0	0	1	3	5
nmo	FBgn0011817	1679	1623	1609	1363	1854	1860	2023	2192	1630	2107	1972	1844	982	2630	1559	2056	1528	2173	1291	2570	2165	2545	2026	2659	1943	1778	1414	1981	2090	2094
oaf	FBgn0011818	1011	963	800	899	1036	1060	1161	1159	791	1126	1147	1109	755	1489	783	1208	827	1266	785	1438	1217	1344	916	1461	883	879	709	1260	1082	901
pcl	FBgn0011822	4	5	3	0	1	1	3	2	0	0	1	0	1	2	0	0	1	1	1	3	0	1	0	0	3	3	1	0	3	44
CG4038	FBgn0011824	449	415	344	404	450	402	554	411	425	461	437	485	280	431	339	435	401	554	337	536	605	615	600	598	524	573	300	706	469	345
Pp2B-14D	FBgn0011826	2311	2382	2366	2432	3044	2920	2978	2773	2455	3220	3414	3091	1757	3512	2237	2785	2348	3036	1849	3267	3396	3385	2840	3544	2630	2687	1872	3410	2935	2496
Pxn	FBgn0011828	4390	4318	4380	4699	4916	4806	5104	4441	4445	5861	5724	5474	3233	6223	3044	4254	2807	3855	3142	5283	5628	5088	4553	5595	3794	4392	3824	5103	5223	3797
Ret	FBgn0011829	95	123	108	132	150	137	134	184	103	148	177	122	75	162	108	165	123	158	70	170	152	186	122	197	113	114	82	169	160	123
Ser12	FBgn0011832	0	0	0	0	0	0	0	0	0	0	0	0	0	0	0	0	0	0	0	1	0	0	0	0	0	0	0	0	0	0
Ser6	FBgn0011834	1	0	0	0	0	0	0	0	1	0	0	0	0	0	0	0	0	0	0	2	0	1	2	2	1	0	12	0	9	3
Taf2	FBgn0011836	383	391	357	414	478	391	447	418	356	513	561	564	356	615	328	460	396	480	318	519	632	597	392	546	305	372	275	487	432	359
Tis11	FBgn0011837	2447	2427	2502	2396	2715	2596	2576	2122	2535	2920	3374	2787	2102	2771	2675	2452	2522	3189	2560	3041	3689	2813	2901	3105	3165	2953	1978	3333	2922	2622
tRNA:Ala-AGC-2-3	FBgn0011840	0	0	0	0	0	0	0	0	0	0	0	0	0	0	0	0	0	0	0	0	0	0	0	0	0	0	0	0	0	0
tRNA:Asp-GTC-1-10	FBgn0011844	0	0	0	0	0	0	0	0	0	0	0	0	0	0	0	0	0	0	0	0	0	0	0	0	0	0	0	0	0	0
tRNA:Asp-GTC-1-11	FBgn0011845	0	0	1	0	0	0	0	1	0	1	0	2	0	0	0	0	0	0	0	2	0	1	1	0	0	0	0	0	0	0
tRNA:Glu-TTC-1-6	FBgn0011848	0	0	0	0	0	0	0	0	0	0	0	0	0	0	0	0	0	0	0	0	0	0	0	0	0	0	0	0	0	0
tRNA:Glu-TTC-1-5	FBgn0011849	0	0	1	0	0	0	0	0	0	0	0	0	0	0	0	0	0	0	0	0	0	0	0	0	0	0	0	0	0	0
tRNA:Glu-TTC-1-4	FBgn0011850	0	0	0	0	0	0	0	0	0	0	0	0	0	0	0	0	0	0	0	0	0	0	0	0	0	0	0	0	0	0
tRNA:Glu-CTC-3-4	FBgn0011851	0	0	0	0	0	0	0	0	0	0	0	0	0	0	0	0	0	0	0	0	0	0	0	0	0	0	0	0	0	0
tRNA:Glu-CTC-3-5	FBgn0011852	0	0	0	0	0	0	0	0	0	0	0	0	0	0	0	0	0	0	0	0	0	0	0	0	0	0	0	0	0	0
tRNA:Glu-CTC-3-6	FBgn0011853	0	0	0	0	0	0	0	0	0	0	0	0	0	0	0	0	0	0	0	0	0	0	0	0	0	0	0	0	0	0
tRNA:Glu-CTC-3-8	FBgn0011854	0	0	0	0	0	0	0	0	0	0	0	0	0	0	0	0	0	0	0	0	0	0	0	0	0	0	0	0	0	0
tRNA:Glu-CTC-3-9	FBgn0011855	0	0	0	0	0	0	0	0	0	0	0	0	0	0	0	0	0	0	0	0	0	0	0	0	0	0	0	0	0	0
tRNA:Phe-GAA-1-8	FBgn0011858	0	0	0	0	0	0	0	0	0	0	0	0	0	0	0	0	0	0	0	0	0	0	0	0	0	0	0	1	0	0
tRNA:Gly-GCC-1-1	FBgn0011859	5	3	4	0	3	2	4	3	2	3	3	2	1	4	2	2	5	5	3	6	5	5	2	5	5	1	3	4	5	2
tRNA:Gly-GCC-1-2	FBgn0011860	0	0	0	0	0	0	0	0	0	0	0	0	0	0	0	0	0	0	0	0	0	1	0	0	0	0	0	0	0	0
tRNA:Gly-GCC-1-3	FBgn0011861	0	0	0	0	0	0	0	0	0	0	0	0	0	0	0	0	0	0	0	0	0	0	0	0	0	0	0	0	0	0
tRNA:Gly-GCC-1-4	FBgn0011862	0	0	0	0	0	0	0	0	0	0	0	0	0	0	0	0	0	0	0	0	0	0	0	0	0	0	0	0	0	0
tRNA:Gly-GCC-1-5	FBgn0011863	0	0	0	0	0	0	0	0	0	1	0	0	2	0	0	0	0	0	0	0	0	0	0	0	0	0	0	0	0	0
tRNA:Gly-GCC-1-6	FBgn0011864	0	0	0	1	0	0	0	0	0	0	0	0	0	0	0	0	0	0	0	0	0	0	0	0	0	0	0	0	0	0
tRNA:Gly-GCC-1-7	FBgn0011865	0	0	0	0	0	0	0	0	0	0	0	0	0	0	0	0	0	0	0	0	0	0	0	0	0	0	0	0	0	0
tRNA:Gly-GCC-2-1	FBgn0011866	0	0	0	0	0	0	0	0	0	0	0	0	0	0	0	0	0	0	0	0	0	0	0	0	0	0	0	0	0	0
tRNA:Gly-GCC-1-8	FBgn0011867	0	0	0	0	0	0	0	0	0	0	0	0	0	0	0	0	0	0	0	0	0	0	0	0	0	0	0	0	0	0
tRNA:Gly-GCC-1-9	FBgn0011868	0	0	0	0	0	0	0	0	0	0	0	0	0	0	0	0	0	0	0	0	0	0	0	0	0	0	0	0	0	0
tRNA:Gly-GCC-1-10	FBgn0011869	0	0	0	0	0	0	0	0	0	0	0	0	0	0	0	0	0	0	0	0	0	0	0	0	0	0	0	0	0	0
tRNA:Gly-GCC-1-11	FBgn0011870	0	0	0	0	0	0	0	0	0	0	0	0	0	0	0	0	0	0	0	0	0	0	0	0	0	0	0	0	1	0
tRNA:Gly-GCC-1-12	FBgn0011871	1	0	1	0	0	0	0	1	0	0	1	0	0	0	1	0	0	0	0	0	1	1	0	0	0	1	0	0	0	0
tRNA:Gly-GCC-1-13	FBgn0011872	1	1	0	0	0	0	2	2	0	1	0	0	0	0	0	0	0	2	0	2	1	0	0	0	0	1	1	2	2	4
tRNA:His-GTG-2-1Psi	FBgn0011877	0	0	0	0	0	0	0	0	0	0	0	0	0	0	0	0	0	0	1	0	0	0	0	0	0	0	1	0	1	0
tRNA:His-GTG-1-4	FBgn0011878	1	1	0	0	1	0	1	0	0	1	3	4	0	1	1	0	2	0	0	0	1	0	0	0	0	0	1	3	0	1
tRNA:Ala-TGC-2-1	FBgn0011879	0	0	0	0	0	0	0	0	0	0	0	0	0	0	0	0	0	0	0	0	0	0	0	0	0	0	0	0	0	0
tRNA:Ile-AAT-1-1	FBgn0011880	1	0	1	1	0	2	0	3	0	2	1	0	1	2	0	0	3	2	0	6	0	1	2	1	2	3	0	1	1	1
tRNA:Ile-AAT-1-3	FBgn0011881	0	0	0	0	0	0	0	0	0	0	0	0	0	0	1	1	0	0	0	0	0	0	0	0	0	0	0	1	0	0
tRNA:Ile-AAT-1-4	FBgn0011882	0	0	0	0	0	0	0	0	0	0	0	0	0	0	0	0	0	0	0	0	1	0	0	1	0	0	0	0	0	1
tRNA:Ile-AAT-1-5	FBgn0011883	0	0	1	0	0	0	0	0	0	0	0	0	0	0	0	0	0	0	0	0	0	0	0	0	0	0	0	0	0	0
tRNA:Ile-AAT-1-6	FBgn0011884	0	0	0	0	0	0	0	0	0	0	0	0	0	0	1	0	0	0	0	0	0	2	0	0	0	0	0	1	0	0
tRNA:Ile-AAT-1-7	FBgn0011885	1	0	0	0	0	0	0	0	1	0	0	0	0	1	0	0	0	1	1	0	1	0	0	0	0	0	0	0	0	0
tRNA:Lys-CTT-1-4	FBgn0011887	0	0	0	1	0	0	0	0	1	3	0	1	0	1	2	0	1	2	1	2	0	1	2	1	2	0	0	0	1	3
tRNA:Lys-CTT-1-3	FBgn0011888	0	2	0	0	3	3	1	0	2	0	1	1	0	1	0	0	0	0	0	0	1	1	0	1	0	2	1	1	0	0
tRNA:Lys-CTT-1-2	FBgn0011889	2	0	0	0	1	1	2	0	0	1	1	0	1	0	1	1	1	0	1	0	0	0	0	1	0	1	0	1	1	0
tRNA:Lys-CTT-1-5	FBgn0011890	0	0	0	2	0	0	0	0	2	1	0	0	0	1	1	0	1	0	0	0	1	0	0	0	2	0	1	5	1	0
tRNA:Lys-CTT-1-1	FBgn0011891	0	0	0	0	0	0	0	0	0	0	0	0	0	0	0	0	0	0	0	0	0	1	1	0	1	1	1	0	0	0
tRNA:Lys-CTT-1-6	FBgn0011892	2	0	1	3	1	4	2	6	4	2	2	2	5	3	1	0	5	3	2	1	6	5	4	9	7	6	5	3	0	5
tRNA:Lys-CTT-1-7	FBgn0011893	1	3	3	3	4	7	1	3	0	4	3	2	1	4	3	4	3	4	2	8	1	4	2	1	3	4	4	4	2	3
tRNA:Lys-CTT-1-8	FBgn0011894	1	0	2	2	2	5	0	0	2	3	0	3	0	3	1	4	0	6	2	3	0	4	0	1	3	5	5	4	1	4
tRNA:Lys-CTT-1-9	FBgn0011895	0	1	5	0	1	5	2	6	1	4	4	0	2	5	1	4	1	5	1	5	3	4	3	3	4	2	2	0	3	7
tRNA:Lys-CTT-1-10	FBgn0011896	0	0	0	0	0	0	0	0	0	0	0	0	0	0	0	0	0	0	0	0	0	0	1	0	0	0	0	1	0	0
tRNA:Lys-CTT-1-11	FBgn0011897	0	0	0	0	0	0	0	0	0	0	0	0	0	0	0	0	0	0	0	0	0	0	0	0	0	0	0	0	0	0
tRNA:Lys-TTT-1-1	FBgn0011902	0	0	0	0	0	0	0	0	0	0	0	0	0	0	0	0	0	0	0	0	0	0	0	0	0	0	1	1	0	0
tRNA:Lys-TTT-2-4	FBgn0011904	0	0	0	0	0	0	0	0	0	0	0	0	0	0	0	0	0	0	0	0	0	0	0	0	0	0	0	0	0	0
tRNA:Lys-TTT-2-5	FBgn0011905	0	0	0	0	0	0	0	0	0	0	0	0	0	0	0	0	0	0	0	0	0	0	0	0	0	0	0	0	0	0
tRNA:Leu-CAG-1-1	FBgn0011906	0	0	0	0	0	0	0	0	0	0	0	0	0	0	0	0	0	0	0	0	0	0	0	0	0	0	0	0	0	0
tRNA:Leu-CAA-2-1	FBgn0011909	0	0	0	0	1	0	0	0	0	0	0	0	0	0	1	0	0	0	0	0	0	0	0	0	0	0	0	0	0	0
tRNA:Leu-CAA-1-1	FBgn0011910	0	0	0	0	0	0	0	0	0	0	1	0	1	0	0	0	0	0	0	0	0	0	1	0	0	0	0	0	0	0
tRNA:Met-CAT-1-1	FBgn0011915	0	0	0	0	0	0	0	0	0	0	0	0	0	0	0	0	0	0	0	0	0	0	0	0	0	0	0	0	0	0
tRNA:Met-CAT-1-2	FBgn0011916	2	2	1	1	0	0	1	0	0	0	0	1	2	0	0	0	0	0	0	1	1	1	0	2	1	0	0	0	0	1
tRNA:Met-CAT-1-5	FBgn0011919	4	3	2	2	0	2	3	1	4	5	1	2	1	5	3	4	0	6	4	2	3	3	1	1	1	1	8	1	2	3
tRNA:iMet-CAT-2-1	FBgn0011921	0	1	0	0	0	0	0	0	0	0	0	0	1	0	1	0	2	0	0	0	0	0	1	0	0	0	0	0	0	0
tRNA:iMet-CAT-1-4	FBgn0011927	0	0	0	0	0	0	0	0	0	0	0	0	0	0	0	0	0	0	0	0	0	0	0	0	0	0	0	0	0	0
tRNA:iMet-CAT-1-5	FBgn0011928	0	0	0	0	0	0	0	0	0	0	0	0	0	0	0	0	0	0	0	0	0	0	0	0	0	0	0	0	0	0
tRNA:Asn-GTT-1-6	FBgn0011931	0	0	1	0	2	0	0	0	0	0	0	5	0	0	0	0	0	0	3	0	0	0	0	1	1	0	0	1	0	0
tRNA:Asn-GTT-1-5	FBgn0011932	0	0	0	0	0	0	0	0	0	0	0	0	2	1	0	1	0	0	0	0	0	1	0	0	0	1	0	0	0	0
tRNA:Asn-GTT-1-4	FBgn0011933	0	0	0	0	0	0	0	0	0	0	0	0	0	0	0	0	0	0	0	0	0	0	1	0	0	0	0	0	0	0
tRNA:Asn-GTT-1-8	FBgn0011934	0	0	0	0	0	0	0	0	0	0	0	0	0	0	0	1	0	0	0	0	0	0	0	0	0	0	1	0	0	0
tRNA:Asn-GTT-1-7	FBgn0011935	0	0	0	0	0	0	0	0	0	0	0	1	0	0	0	0	0	0	0	0	0	0	0	0	0	0	0	0	0	0
tRNA:Asn-GTT-1-3	FBgn0011936	1	0	1	0	1	0	0	0	0	0	0	0	0	0	0	0	0	0	0	0	0	0	0	0	0	0	0	0	0	0
tRNA:Asn-GTT-1-2	FBgn0011937	0	0	0	0	0	0	0	0	0	1	0	0	0	0	0	0	0	0	0	0	0	0	0	0	1	0	0	0	0	0
tRNA:Asn-GTT-1-1	FBgn0011938	0	0	0	0	1	0	0	0	0	0	0	0	0	0	0	0	0	0	0	0	0	0	0	0	0	0	1	0	0	0
tRNA:Pro-TGG-1-1	FBgn0011944	0	0	0	0	0	0	0	0	0	0	0	0	0	0	0	0	0	0	0	0	0	0	0	0	0	0	0	0	0	0
tRNA:Pro-TGG-1-2	FBgn0011945	0	0	0	0	0	0	0	0	0	0	0	0	0	0	0	0	0	0	0	0	0	0	0	0	0	0	0	0	0	0
tRNA:Arg-TCG-3-1	FBgn0011948	0	0	0	0	0	0	0	0	0	0	0	0	0	0	0	0	0	0	0	0	0	0	0	0	0	0	0	0	0	0
tRNA:Arg-TCG-3-2	FBgn0011949	0	0	0	0	0	0	0	0	0	0	0	0	0	0	0	0	0	0	0	0	0	0	0	0	0	0	0	0	0	0
tRNA:Arg-TCG-3-3	FBgn0011950	0	0	0	0	0	0	0	0	0	0	0	0	0	0	0	0	0	0	0	0	0	0	0	0	0	0	0	0	0	0
tRNA:Arg-TCG-3-4	FBgn0011951	0	0	0	0	0	0	0	0	0	0	0	0	0	1	0	0	0	0	0	0	0	0	0	0	0	0	0	0	0	0
tRNA:Arg-TCG-2-1	FBgn0011952	0	0	0	0	0	0	0	0	0	0	0	0	1	0	0	0	0	0	0	0	0	0	0	0	0	0	0	0	0	0
tRNA:Arg-TCG-1-1	FBgn0011953	0	0	0	0	0	0	0	0	0	0	0	0	0	0	0	0	0	0	0	0	0	2	0	0	0	0	0	0	0	0
tRNA:Arg-TCG-2-2	FBgn0011954	1	0	0	0	0	1	0	0	0	1	0	0	1	0	1	0	0	0	0	0	0	0	1	1	0	1	0	0	0	3
tRNA:Arg-ACG-1-5	FBgn0011955	2	1	0	1	0	3	2	1	1	1	2	0	1	0	1	0	1	1	0	0	2	1	0	3	1	0	0	0	3	1
tRNA:Arg-ACG-1-3	FBgn0011956	0	0	0	0	0	0	0	0	0	0	0	0	0	0	0	0	0	0	0	0	0	0	0	0	0	0	0	0	0	0
tRNA:Arg-ACG-1-2	FBgn0011957	0	0	1	0	2	0	0	2	1	2	0	1	2	1	0	2	0	0	0	1	0	4	2	2	0	0	0	0	3	0
tRNA:Arg-ACG-1-1	FBgn0011958	0	0	0	0	0	0	0	0	0	0	0	0	0	0	0	0	0	0	0	0	1	0	0	0	0	2	0	0	0	0
tRNA:Arg-ACG-1-10	FBgn0011959	0	0	0	0	0	0	0	0	0	0	0	0	0	0	0	0	0	0	0	0	0	0	0	0	0	0	0	0	0	0
tRNA:Arg-ACG-1-9	FBgn0011960	0	0	0	0	0	0	0	0	0	0	0	0	0	0	0	0	0	0	0	0	0	0	0	0	0	0	0	0	0	0
tRNA:Arg-ACG-1-8	FBgn0011961	0	0	0	0	0	0	0	0	0	0	0	0	0	0	0	0	0	0	0	0	0	0	0	0	0	0	0	0	0	0
tRNA:Arg-ACG-1-7	FBgn0011962	0	0	0	0	0	0	0	0	0	0	0	0	0	0	0	0	0	0	0	0	0	0	0	0	0	0	0	0	0	0
tRNA:Arg-ACG-1-6	FBgn0011963	0	0	0	0	0	0	0	0	0	0	0	0	0	0	0	0	0	0	0	0	0	0	0	0	0	0	0	0	0	0
tRNA:Arg-TCG-4-1	FBgn0011965	0	0	0	0	0	0	0	0	0	1	0	0	0	0	1	0	0	0	0	1	2	0	0	0	0	0	0	0	0	0
tRNA:Arg-TCG-2-3	FBgn0011966	0	0	0	0	0	0	1	0	0	0	1	0	0	1	0	0	0	0	0	0	0	0	0	0	0	0	0	0	0	0
tRNA:Ser-GCT-2-1	FBgn0011970	0	0	0	0	0	0	0	0	0	0	0	0	0	0	1	0	0	0	0	0	0	0	0	0	0	0	0	0	0	0
tRNA:Ser-GCT-2-2	FBgn0011971	0	0	0	0	0	0	0	0	0	0	0	0	1	0	0	0	0	0	0	0	0	0	0	0	0	1	0	0	0	0
tRNA:Ser-AGA-1-1	FBgn0011974	0	0	0	0	0	0	0	0	0	0	0	0	0	0	0	0	0	0	0	0	0	0	0	0	0	0	0	0	0	0
tRNA:Ser-CGA-1-1	FBgn0011975	0	0	0	0	0	0	0	0	0	0	0	0	0	0	0	0	0	0	0	0	0	0	0	0	0	0	0	0	0	0
tRNA:Ser-CGA-1-2	FBgn0011976	0	0	0	0	0	0	0	0	0	0	0	0	0	0	0	0	0	0	0	0	0	0	0	0	0	0	0	0	0	0
tRNA:Ser-CGA-1-3	FBgn0011977	0	0	0	0	0	0	0	0	0	0	0	0	0	0	0	0	0	0	0	0	0	0	0	0	0	0	0	0	0	0
tRNA:Ser-AGA-3-1	FBgn0011980	0	0	0	0	0	0	0	0	0	0	0	0	0	0	0	0	0	0	0	0	0	0	0	0	0	0	0	0	0	0
tRNA:Ser-AGA-3-2	FBgn0011981	0	0	0	0	0	0	0	0	0	0	0	0	0	0	0	0	0	0	0	0	0	0	0	1	0	0	0	0	0	0
tRNA:Ser-AGA-2-1	FBgn0011982	0	0	0	0	2	0	1	0	0	2	0	0	1	2	0	1	1	0	2	1	1	0	0	0	0	1	1	0	0	0
tRNA:Ser-AGA-2-2	FBgn0011983	0	0	0	0	0	0	0	0	0	0	0	0	0	0	0	0	0	0	0	0	0	0	0	0	0	0	0	0	0	0
tRNA:Ser-AGA-2-4	FBgn0011984	0	0	0	0	0	0	0	0	0	0	0	0	0	0	0	0	0	0	0	0	0	0	0	0	1	0	0	0	0	0
tRNA:Ser-AGA-2-3	FBgn0011985	0	0	1	1	4	2	0	1	1	2	2	0	1	1	0	0	0	2	0	0	3	3	0	3	1	1	1	0	1	0
tRNA:Ser-AGA-2-5	FBgn0011986	0	0	0	0	0	0	0	0	0	0	0	0	0	0	0	0	0	0	0	0	0	0	0	0	0	0	0	0	0	0
tRNA:SeC-TCA-1-1	FBgn0011987	0	0	1	0	0	0	0	1	0	3	1	0	0	0	0	0	0	1	0	0	0	0	0	1	2	0	0	0	0	0
tRNA:Thr-AGT-1-5	FBgn0011993	0	0	0	0	0	1	1	2	0	1	0	0	0	0	0	0	0	0	0	0	0	0	0	0	0	0	0	0	0	0
tRNA:Thr-AGT-1-6	FBgn0011994	0	0	0	0	0	0	0	0	0	0	0	0	0	0	0	0	0	0	0	0	0	0	0	0	0	0	0	0	0	0
tRNA:Val-CAC-2-2	FBgn0011998	0	0	0	0	0	0	0	0	0	0	0	0	0	0	0	0	0	0	0	0	0	0	0	0	0	0	0	0	0	0
tRNA:Val-CAC-2-1	FBgn0011999	0	0	0	0	0	0	0	0	0	0	0	0	0	0	0	0	0	0	0	0	0	0	0	0	0	0	0	0	0	0
tRNA:Val-CAC-2-3	FBgn0012000	0	0	0	0	0	0	0	0	0	0	0	0	0	0	0	0	0	0	0	0	0	0	0	0	0	0	0	0	0	0
tRNA:Val-CAC-2-4	FBgn0012001	0	0	0	0	0	0	0	0	0	0	0	0	0	0	0	0	0	0	0	0	0	0	0	0	0	0	0	0	0	0
tRNA:Val-CAC-1-1	FBgn0012002	0	0	0	0	0	0	0	0	0	0	0	0	0	0	0	0	0	0	0	0	0	0	0	0	0	0	0	0	0	0
tRNA:Val-CAC-2-5	FBgn0012003	0	1	0	0	1	0	0	2	0	0	0	0	0	0	0	0	0	0	0	0	0	0	0	0	0	0	0	2	0	0
tRNA:Val-CAC-2-6	FBgn0012004	0	0	0	0	0	0	0	0	0	0	0	0	0	0	0	0	0	0	0	0	0	0	0	0	0	0	0	0	0	0
tRNA:Val-AAC-2-4	FBgn0012009	0	0	0	0	0	0	1	0	0	0	0	0	0	1	0	0	0	0	0	1	0	0	0	0	0	0	1	0	0	1
tRNA:Val-AAC-2-3	FBgn0012010	0	0	0	0	1	0	0	0	0	0	0	0	0	0	0	0	0	1	0	1	1	0	0	1	0	0	0	1	0	0
tRNA:Val-AAC-1-1	FBgn0012011	0	0	0	0	0	0	0	0	0	0	0	0	0	0	0	0	0	0	0	0	0	0	0	0	0	0	0	0	0	0
tRNA:Tyr-GTA-1-3	FBgn0012016	0	0	0	1	0	0	1	0	0	0	0	0	0	0	0	0	0	0	0	0	0	1	1	0	0	0	0	0	0	0
tRNA:Tyr-GTA-1-2	FBgn0012017	0	0	0	0	1	0	0	0	0	0	0	0	0	0	0	0	0	0	0	0	0	0	0	0	0	0	0	0	0	0
tRNA:Tyr-GTA-3-1	FBgn0012018	0	0	0	0	0	0	0	0	0	0	0	0	0	1	0	1	1	0	0	0	0	1	0	0	0	0	0	0	0	1
tRNA:Tyr-GTA-1-8	FBgn0012024	0	0	0	0	0	0	0	0	0	0	0	1	0	0	0	0	0	0	0	0	0	0	0	0	0	0	0	0	0	0
tRNA:Tyr-GTA-1-7	FBgn0012025	1	0	1	0	0	0	0	0	0	0	0	0	0	1	0	0	0	0	0	0	0	0	0	0	0	0	0	0	0	0
tRNA:Tyr-GTA-1-6	FBgn0012026	0	0	0	0	2	0	0	0	0	0	0	1	0	0	0	0	0	0	0	0	1	0	0	0	0	0	0	0	1	0
tRNA:Tyr-GTA-1-5	FBgn0012027	0	0	0	0	0	1	0	0	0	0	0	2	1	0	0	0	0	0	0	0	1	1	0	0	0	0	0	1	0	1
tRNA:Tyr-GTA-1-4	FBgn0012028	0	0	0	0	0	0	0	0	0	0	0	0	0	0	0	0	0	0	0	0	0	0	0	0	0	0	0	0	0	0
AcCoAS	FBgn0012034	26562	23921	20145	20647	25868	22722	25953	23205	25870	23387	24982	20705	13448	26193	17201	22314	16799	23283	15379	24094	31357	32485	21528	29826	23082	24066	15986	22694	23540	19177
Aldh	FBgn0012036	31089	29425	27020	29609	34247	28806	33133	23100	31278	34412	37598	31395	17292	24016	19386	24041	17959	24521	19000	23246	37382	28634	28810	31681	25518	28012	21423	30998	30968	23315
Ance	FBgn0012037	1456	1687	1380	1584	1669	1568	1717	1324	1380	1877	2393	2057	1761	2534	1393	1747	1145	1764	1151	1932	2689	2148	1556	1893	1888	2208	1143	2644	2243	1649
AttA	FBgn0012042	305	313	1334	1461	1152	206	674	461	398	1254	312	386	3139	1749	2216	568	3359	2524	938	2056	1167	1281	430	2407	2011	1072	707	222	1256	1731
CalpA	FBgn0012051	2552	2734	2548	2571	2856	2571	3316	2836	2329	3412	3832	3574	2887	4032	2828	3194	2910	3896	2507	3591	3972	3688	2778	3710	2596	2978	1807	3687	3237	2748
Cdc27	FBgn0012058	1136	1135	1114	1125	1310	1226	1438	1260	1048	1552	1509	1469	939	1745	1036	1396	1246	1557	925	1572	1603	1637	1165	1689	1057	1245	842	1526	1359	999
Dh44	FBgn0012344	2238	2193	1889	1909	2445	2281	2892	2345	2022	2645	2569	2542	1266	2846	1852	2205	1828	2355	1696	2683	2630	2244	2592	2891	1791	1822	1386	2317	2661	2254
Trl	FBgn0013263	430	463	453	472	615	532	554	494	454	683	688	643	409	706	595	574	611	733	591	621	663	632	514	662	562	587	333	666	531	553
FK506-bp1	FBgn0013269	855	858	732	917	926	855	992	820	847	1134	1071	1084	610	947	701	1026	772	1133	622	1057	1248	1359	1018	1241	820	1037	519	1179	983	743
Gp150	FBgn0013272	18506	18498	17184	18267	21202	19655	23217	19719	17126	22573	25836	23181	12516	25259	15481	21531	18679	27403	15512	25689	25868	25465	19481	25053	17772	19620	12381	26688	21475	18954
Hsp70Aa	FBgn0013275	0	0	2	0	0	0	1	0	1	0	0	0	0	0	1	0	0	1	0	0	1	0	0	0	0	0	0	0	0	0
Hsp70Ab	FBgn0013276	1	0	0	0	0	0	1	0	0	0	1	1	1	0	0	0	0	0	16	1	0	1	0	1	0	0	1	0	0	0
Hsp70Ba	FBgn0013277	6	8	4	4	1	0	7	1	4	4	6	7	8	3	3	3	0	0	16	7	0	6	5	7	0	0	2	3	0	3
Hsp70Bb	FBgn0013278	8	6	20	9	10	13	40	24	15	14	9	18	18	26	35	15	17	13	69	24	29	19	14	11	17	22	7	17	21	15
Hsp70Bc	FBgn0013279	25	17	13	8	8	15	31	13	23	33	21	21	11	23	28	19	19	17	82	25	40	27	21	17	21	22	12	20	10	11
ProtA	FBgn0013300	0	0	0	0	0	0	0	0	0	0	0	0	0	0	0	0	0	0	0	0	0	0	0	0	0	0	0	0	0	0
ProtB	FBgn0013301	0	0	0	0	0	0	0	0	0	0	0	0	0	0	0	0	0	0	0	0	0	0	0	0	0	0	0	0	0	1
Nca	FBgn0013303	1852	2024	1661	1935	2322	2002	2372	2265	1735	2451	2565	2565	1446	3143	1920	2776	1949	2988	1946	2846	2688	2727	2192	3012	2133	1983	1451	2755	2312	2128
Nmda1	FBgn0013305	6222	6502	6394	6877	7792	6917	7581	6874	6542	8714	9108	8492	6756	9214	7338	7903	7781	9413	7251	8790	10153	8988	7431	9681	7124	7454	4479	9790	8121	7118
Odc1	FBgn0013307	3325	2888	3536	3139	3445	3328	3252	2359	3015	3206	3964	3597	5126	3759	3075	2753	4216	4534	2823	3443	5256	4409	3932	4020	3497	4453	2442	6010	3830	2283
Odc2	FBgn0013308	198	204	188	168	210	204	176	143	212	150	181	162	110	129	209	188	122	153	152	142	245	170	219	187	270	270	110	246	206	161
Ptth	FBgn0013323	41	36	49	50	29	34	56	36	30	52	56	61	61	59	81	59	99	88	64	55	72	75	53	69	53	56	35	76	57	51
RpL11	FBgn0013325	25920	24811	30491	28863	27356	25263	28446	20836	27718	33330	34825	32081	37104	30608	24222	27993	26614	33900	20737	28434	36312	31578	29680	31438	30011	35797	21298	40025	31717	18199
Sap47	FBgn0013334	20322	19678	18824	19529	24961	24384	27163	28797	19617	28392	26795	27167	13714	33951	20943	29544	20176	28283	19432	34227	28497	33824	24138	35907	23809	23138	16641	25796	25758	26323
nSyb	FBgn0013342	24403	24710	22977	23730	31512	29491	30828	29688	22065	31260	32156	31558	17958	38007	23840	31800	30173	38162	21179	36909	37343	39705	27918	38786	25998	27379	18943	36647	32207	27717
Syx1A	FBgn0013343	3224	3392	3365	3149	3948	4490	4480	4591	3300	4888	4662	4427	2207	5044	3143	4487	3373	4385	2664	4901	4498	5328	3994	5771	3665	3785	3018	3944	4256	3918
TfIIA-S	FBgn0013347	828	858	853	980	1008	908	1107	866	811	1093	1244	1142	1059	1434	821	1231	1034	1403	769	1344	1207	1336	861	1328	916	998	649	1513	1130	754
TpnC41C	FBgn0013348	567	684	801	818	969	803	803	989	699	1069	752	846	302	1125	713	1152	354	1428	800	1694	899	1414	520	941	930	1087	592	922	1058	1271
bcn92	FBgn0013432	559	505	528	516	644	545	645	496	447	614	690	665	486	712	556	629	568	715	468	740	815	746	504	579	505	556	390	771	619	476
beat-Ia	FBgn0013433	375	384	295	342	438	399	493	473	380	545	493	477	270	608	347	478	416	546	336	555	585	526	417	634	340	360	279	500	448	426
Cdc2rk	FBgn0013435	266	291	294	292	324	255	380	277	289	366	358	378	312	446	253	360	280	369	284	358	412	416	319	434	242	348	226	390	303	256
igl	FBgn0013467	6847	7708	6307	7025	9212	8539	9374	9301	7174	9981	10208	9817	6472	12358	8792	10732	8566	10866	7701	11186	10555	10994	8710	12613	7966	7332	5602	9128	9147	9544
klu	FBgn0013469	118	127	116	119	162	140	171	106	153	155	156	140	66	161	104	155	112	160	96	152	158	179	139	167	134	117	101	189	135	138
MED20	FBgn0013531	126	127	85	126	118	139	141	110	117	155	141	150	127	160	104	151	109	172	104	202	147	176	116	150	100	140	72	160	145	118
l(2)dtl	FBgn0013548	146	165	157	166	187	173	195	177	158	255	248	210	199	299	156	238	235	279	141	294	228	303	183	295	152	193	130	252	215	166
Pex1	FBgn0013563	412	422	380	409	493	374	579	547	439	652	580	543	481	801	388	607	460	618	398	546	610	683	391	642	374	462	285	569	484	433
mtd	FBgn0013576	14122	13872	13940	14241	16661	17229	17402	17420	13734	19448	18769	17424	9540	19818	13722	17842	14056	19016	12365	19583	19384	20346	16935	21354	15874	16390	11562	18806	17714	15541
mt:ATPase6	FBgn0013672	40431	48682	46227	48015	54471	47436	52332	41439	51480	65559	72340	60662	50524	88517	68678	73742	46257	91714	67321	76244	75304	66249	59109	77442	61975	48920	33081	64301	53859	65835
mt:ATPase8	FBgn0013673	72	103	90	74	92	53	79	50	93	80	113	75	72	93	96	84	65	129	92	77	111	67	69	91	88	59	41	71	65	104
mt:CoI	FBgn0013674	256809	304368	350634	330413	386195	347570	381250	317187	313125	395240	436244	403329	407012	541624	445693	478468	337990	526293	414785	453119	484978	415235	396841	515260	443414	382781	259862	498160	393234	461578
mt:CoII	FBgn0013675	54648	67906	68998	68665	80740	69363	75957	61694	67635	82919	88255	77833	69092	106753	81820	93278	60128	110531	80907	87423	97706	82666	73397	97175	87133	72888	55246	96233	80709	86554
mt:CoIII	FBgn0013676	119733	137290	155111	146064	177523	157158	177843	154601	137459	170859	190088	178180	150295	255421	176257	225414	138679	253623	178197	217884	207128	194812	165651	227105	184326	167016	111928	211263	173625	197044
mt:Cyt-b	FBgn0013678	109878	129444	135530	132537	162410	146160	153953	127170	133083	168457	184609	166756	159506	231302	178872	193544	135035	235382	178373	198647	196419	176804	159784	212020	193594	160075	102630	203138	160259	195383
mt:ND1	FBgn0013679	20990	25133	28938	23245	30217	25976	27278	21185	26112	30695	35022	30358	32409	38556	33894	31837	23902	39372	37939	34263	37458	31459	33756	37895	40674	31115	26521	37484	30363	40402
mt:ND2	FBgn0013680	1549	3051	923	699	785	587	700	382	2633	3163	3355	522	3152	1780	1521	647	935	3749	1976	1546	3887	1297	699	778	1251	853	908	1717	1668	1273
mt:ND3	FBgn0013681	4170	5267	6343	5105	5864	5036	5545	4020	4916	5470	6104	4996	6838	6399	6489	5693	4233	7098	6840	5498	6683	5583	5615	5877	7754	5645	5607	6415	5495	6616
mt:ND4L	FBgn0013683	188	551	91	67	109	99	112	60	373	513	491	87	270	192	168	122	114	540	151	137	491	130	94	91	132	92	147	206	176	136
mt:ND5	FBgn0013684	30059	37080	31416	31516	40183	35704	35815	26550	36316	41716	49321	39319	28343	52749	39772	43213	26862	57581	42015	43488	50099	43474	42478	51174	50047	37149	34217	49715	37051	51214
mt:ND6	FBgn0013685	76	93	101	81	88	74	103	63	76	93	130	69	114	111	168	100	79	118	156	85	136	89	108	106	173	99	120	89	101	153
mt:lrRNA	FBgn0013686	827988	952567	1083380	1091972	1336739	1193423	1325461	1240612	1013174	1324042	1379143	1266376	954210	1917074	1148379	1591468	962295	2026034	1106674	1580244	1471800	1555550	1110581	1587310	1419453	1238738	917933	1582784	1151875	1367800
mt:srRNA	FBgn0013688	1666	1580	2090	1966	2233	2019	1965	1895	2092	2534	2428	2166	3784	4236	2787	3132	1615	3742	2314	2901	2241	2837	2123	3548	3037	2386	3049	2742	2354	3216
mt:tRNA:A	FBgn0013689	5	7	5	5	6	3	2	4	9	5	3	5	8	4	9	7	9	3	7	8	11	2	6	3	12	12	11	9	1	4
mt:tRNA:C	FBgn0013690	4	0	1	1	3	3	2	1	5	0	0	3	2	2	1	1	2	0	6	3	3	3	1	1	1	0	2	0	3	2
mt:tRNA:D	FBgn0013691	1	0	0	0	0	1	2	0	0	2	1	0	0	2	1	2	0	0	1	0	1	0	1	0	0	0	1	2	0	0
mt:tRNA:E	FBgn0013692	0	0	0	0	0	0	0	0	0	0	0	0	0	0	0	0	0	0	0	0	0	0	0	0	0	0	0	0	0	0
mt:tRNA:F	FBgn0013693	0	0	0	0	0	0	0	0	0	0	0	0	0	0	0	0	0	0	0	0	0	0	0	0	0	0	0	0	0	0
mt:tRNA:G	FBgn0013694	4	5	3	6	4	1	2	9	4	7	6	5	7	2	5	9	6	5	8	3	6	5	13	7	12	4	7	11	4	6
mt:tRNA:H	FBgn0013695	0	1	0	1	2	2	0	0	2	0	0	0	0	0	0	0	0	0	0	1	0	2	1	1	0	0	0	2	2	0
mt:tRNA:I	FBgn0013696	0	2	2	0	1	0	0	3	0	0	1	2	3	2	2	0	2	3	4	2	1	2	0	2	6	3	5	2	2	4
mt:tRNA:K	FBgn0013697	5	2	2	3	4	4	5	1	9	6	5	6	8	7	5	2	1	7	4	7	7	7	2	3	11	6	7	6	4	5
mt:tRNA:L:CUN	FBgn0013698	1	1	2	1	1	4	0	1	4	0	3	1	2	2	2	1	0	3	1	3	2	2	3	2	1	1	0	3	0	3
mt:tRNA:L:UUR	FBgn0013699	0	6	1	0	1	0	2	1	1	1	4	1	4	1	1	1	1	1	1	0	7	0	1	0	0	3	1	2	2	2
mt:tRNA:M	FBgn0013700	1	1	1	0	0	0	0	1	0	0	1	1	1	0	0	1	0	0	1	2	0	0	0	1	0	1	0	0	1	1
mt:tRNA:N	FBgn0013701	0	0	0	0	0	0	1	2	1	0	1	0	0	0	1	0	2	0	1	0	0	1	1	0	0	0	0	0	0	0
mt:tRNA:P	FBgn0013702	0	0	1	0	0	0	0	0	0	0	0	0	0	0	0	0	0	0	0	1	0	0	0	0	0	0	0	0	0	0
mt:tRNA:Q	FBgn0013703	0	0	0	0	3	0	0	0	0	1	0	0	1	0	0	0	1	0	0	0	0	3	0	0	1	0	1	1	1	1
mt:tRNA:R	FBgn0013704	2	6	6	1	5	3	7	0	2	7	4	3	3	6	1	3	4	4	7	5	2	8	3	5	13	6	6	7	4	1
mt:tRNA:S:AGY	FBgn0013705	0	0	0	0	0	0	0	0	0	0	0	0	0	0	0	0	0	0	0	0	0	0	0	0	1	1	0	0	0	0
mt:tRNA:S:UCN	FBgn0013706	0	1	0	0	0	0	0	0	0	0	0	0	0	0	0	0	0	0	0	0	0	0	0	0	1	0	0	0	0	0
mt:tRNA:T	FBgn0013707	0	0	0	0	0	0	0	0	0	0	0	0	0	0	0	0	0	0	0	0	0	0	0	0	0	0	0	0	0	0
mt:tRNA:V	FBgn0013708	0	0	0	0	0	0	0	0	0	0	0	0	0	0	0	0	0	0	0	0	0	1	0	0	0	0	2	0	0	0
mt:tRNA:W	FBgn0013709	0	0	2	0	1	0	1	2	0	0	1	1	2	0	1	0	0	0	1	0	0	1	0	0	1	0	0	0	0	0
mt:tRNA:Y	FBgn0013710	12	7	6	3	8	7	6	3	7	2	10	2	10	10	8	9	6	5	7	16	12	6	13	3	7	6	5	14	8	16
not	FBgn0013717	493	455	432	524	549	452	614	518	444	686	692	646	491	715	473	555	475	558	462	683	619	619	446	625	427	515	361	602	591	393
nuf	FBgn0013718	5115	5280	4879	4953	5773	5573	6856	5689	4882	6214	6894	6291	3905	6935	5399	6075	5649	7556	5262	6754	7439	6591	5733	7266	5647	5594	3693	7492	5993	5512
pck	FBgn0013720	887	945	868	922	1012	1008	1118	1080	838	1125	1263	1183	1039	1425	767	1315	1030	1507	768	1409	1283	1397	911	1408	870	1055	638	1463	1080	868
phyl	FBgn0013725	658	680	623	656	786	771	855	913	684	941	942	819	568	1103	670	900	728	1006	522	992	992	1042	677	1029	577	554	493	975	791	620
pnut	FBgn0013726	2146	2145	2004	2206	2314	2288	2573	2416	1968	2704	2745	2698	1859	3057	1914	2615	2105	2710	1807	3009	2793	2890	2101	3022	1946	2163	1506	2749	2560	1977
sced	FBgn0013732	277	298	249	254	350	342	380	382	273	388	449	384	227	498	264	403	281	363	225	468	376	442	321	426	272	282	223	386	414	308
shot	FBgn0013733	29817	30806	32195	24653	33171	40060	40479	38208	31390	42538	38778	33740	19653	41552	23152	36285	27571	40938	16313	32837	39969	42560	33530	40766	27816	35114	28280	39838	36174	28554
alien	FBgn0013746	1335	1307	1340	1357	1577	1322	1566	1268	1334	1734	1801	1670	1102	1702	1365	1495	1314	1549	1340	1658	2109	1750	1438	1810	1440	1458	965	1934	1535	1344
Arf102F	FBgn0013749	1721	1966	1778	2014	2182	1895	2128	1817	1690	2256	2272	2420	1487	2897	1693	2480	1709	2711	1947	2400	2449	2478	1949	2588	1944	2012	1331	2370	1946	1950
Arf51F	FBgn0013750	2084	2302	2216	2392	2644	2381	2686	2467	2114	2802	3003	2943	2220	3331	2326	2864	2440	3294	2287	3091	3132	3054	2509	3190	2422	2363	1709	3224	2622	2405
Awh	FBgn0013751	89	79	77	84	102	106	113	106	93	113	125	112	71	138	97	134	75	123	72	128	97	119	100	122	86	73	63	129	138	75
Bgb	FBgn0013753	747	760	742	808	958	824	983	897	684	1047	971	1066	748	1338	687	1007	813	1169	704	1334	1013	1232	753	1178	691	721	581	1051	932	747
Bro	FBgn0013755	0	0	0	0	0	0	2	0	0	0	0	0	2	1	0	1	0	0	0	1	1	0	0	0	0	1	0	0	0	0
Mtor	FBgn0013756	1757	1764	1756	1903	2094	2067	2398	2001	1814	2698	2462	2323	1249	2547	1544	1917	1710	2062	1481	2256	2568	2518	2022	2427	1747	1994	1370	2386	2176	1765
CASK	FBgn0013759	6067	5790	5734	5877	6678	7108	7298	7611	5393	7898	7362	7335	3680	8297	4452	7206	5482	7534	3885	8351	7872	9179	6431	9435	5363	5795	5061	7380	6991	5296
Cdk5	FBgn0013762	659	666	626	607	679	649	764	649	672	851	925	879	738	995	592	810	728	920	596	962	942	927	703	903	695	779	525	956	810	644
CG5210	FBgn0013763	23404	21847	23369	24762	22624	20615	22288	12876	23051	26015	30789	27311	25138	21437	22287	15845	21993	19591	20492	17622	30410	17110	21468	20065	19533	21182	13858	23998	24201	16784
Chi	FBgn0013764	1162	1153	1172	1178	1270	1209	1450	1226	1041	1404	1510	1486	1369	1730	1166	1379	1355	1634	939	1576	1741	1690	1161	1642	1166	1301	827	1575	1343	905
cnn	FBgn0013765	2314	2329	2316	2511	2802	2729	3029	2672	2153	3182	3252	2830	2044	3437	2254	2901	2670	3615	2100	3321	3286	3494	2570	3364	2473	2618	1701	3471	2926	2391
Crz	FBgn0013767	595	513	502	592	698	628	682	544	566	665	766	687	581	853	474	665	608	781	493	860	905	789	606	771	529	588	436	833	796	475
Cp1	FBgn0013770	20282	18809	17295	18448	21801	19956	20384	13548	14639	17271	26028	19061	20068	22872	17290	17197	18414	21662	16650	20775	23763	19784	16698	18696	16083	18376	11607	27654	23381	13622
Cyp6a9	FBgn0013771	1155	1137	1197	1192	1330	1174	1201	1001	715	956	1685	1372	474	535	1242	1312	286	535	990	1409	1296	1224	756	968	1076	1194	446	1464	785	565
Cyp6a8	FBgn0013772	826	775	997	826	1100	835	772	839	1016	919	1203	706	1382	1939	874	1334	1309	1773	497	795	964	779	946	1196	1229	934	824	2492	1399	820
Cyp6a22	FBgn0013773	593	500	654	563	602	513	512	316	523	604	837	670	880	623	678	504	715	724	499	505	766	545	614	623	802	841	450	972	797	526
Deaf1	FBgn0013799	1628	1533	1413	1528	1702	1708	1917	1792	1471	1912	1869	1939	1214	2321	1430	1877	1566	1959	1274	2197	2040	2233	1688	2234	1547	1561	1136	2109	1846	1390
Dhc36C	FBgn0013810	91	68	98	94	95	149	116	126	86	131	108	98	56	105	83	122	96	92	68	88	136	104	92	115	108	109	73	126	103	78
Dhc62B	FBgn0013811	56	54	189	144	142	145	192	138	23	71	153	111	62	57	94	95	179	224	141	209	182	212	95	116	78	115	29	96	204	131
Dhc93AB	FBgn0013812	909	887	833	847	1004	1129	1086	1107	978	1309	1230	975	629	1174	756	1130	1045	1430	610	1114	1159	1307	1040	1356	722	807	737	1215	993	758
Dhc98D	FBgn0013813	43	32	46	28	65	46	49	35	33	35	45	35	26	37	33	36	32	41	26	40	51	32	30	49	32	50	24	41	41	26
Elal	FBgn0013949	4323	4324	5189	4719	4864	4287	3970	2193	4518	4445	5448	5329	5374	3834	4103	2610	3664	3283	4101	2998	6120	4143	4098	3441	4378	5151	4106	4278	5101	3105
Esp	FBgn0013953	527	533	534	617	735	756	662	720	449	655	754	663	514	843	513	815	590	873	452	808	834	806	533	834	529	595	349	902	738	474
FK506-bp2	FBgn0013954	5321	5149	4593	5014	5439	4691	5697	4039	4908	6158	6619	6402	3926	5497	3659	4934	3919	6010	3932	5736	6253	5735	4704	5416	3811	4627	3443	5554	5296	3756
Gycalpha99B	FBgn0013972	3706	3574	3104	3671	4135	4028	4611	4579	3334	4866	4641	4557	3117	5745	3237	4670	3581	4617	2691	5488	4863	5580	3730	5562	3379	3536	2723	4544	4652	3343
Gycbeta100B	FBgn0013973	1862	1741	1716	1748	2094	2091	2366	2243	1801	2651	2456	2382	1352	2934	1724	2336	1905	2295	1563	2668	2594	2616	2229	2987	1905	1803	1463	2314	2349	1995
His4r	FBgn0013981	9595	9493	10433	10345	11167	10104	11747	9724	9306	11904	12631	12187	10747	14650	8727	12431	10302	15284	8248	13012	13602	13851	10749	14606	10258	11326	7478	15659	12067	8256
imd	FBgn0013983	698	634	555	620	657	526	693	530	676	899	754	699	654	774	604	631	594	746	558	726	871	727	608	795	569	664	476	891	719	488
MAPk-Ak2	FBgn0013987	2658	2710	2651	2728	3018	2875	3241	2712	2589	3416	3556	3458	2695	3922	2725	3174	2957	3811	2522	3796	3974	3633	2824	3744	2669	2987	2029	3956	3233	2587
Calx	FBgn0013995	8295	7223	6631	6427	7479	7665	8930	9159	7546	10419	9419	9189	4939	11342	6881	10084	6670	10196	5553	11033	9769	10500	8081	11486	6629	7398	5570	9066	7991	7511
Nrx-IV	FBgn0013997	2615	2809	2483	2638	3105	3056	3375	3228	2693	3762	3754	3498	2145	4325	2624	3683	2895	4079	2271	3797	3884	4057	2866	3957	2811	3018	2138	4001	3313	3142
Hf	FBgn0014000	3518	2982	3721	3490	3392	2895	3043	2144	3059	3703	4053	3602	7446	3702	2951	2948	3494	3708	3124	3106	4508	3285	3526	3388	3828	3870	3739	4677	3730	2393
Pdi	FBgn0014002	14307	16934	13364	16138	14967	13785	14429	11186	13369	19190	18787	19524	10056	20349	9552	13176	10003	15439	11037	15777	17326	16995	12272	17673	11577	14037	9562	15012	14589	13716
Ask1	FBgn0014006	1747	1883	1693	1841	2095	1870	2150	1863	1585	2247	2459	2194	1524	2430	1628	2019	1929	2382	1476	2198	2423	2325	1783	2472	1729	2127	1277	2643	2034	1594
Ptp69D	FBgn0014007	947	950	910	979	1153	1037	1235	1057	848	1320	1335	1278	707	1348	941	1032	1049	1167	891	1326	1329	1247	1049	1307	943	986	770	1295	1154	984
Rab2	FBgn0014009	3852	4121	3911	4208	4715	4342	4932	4354	3998	5350	5511	5313	3913	6342	4215	5469	4368	6267	3925	5933	5727	6049	4512	6306	4251	4418	2923	6095	4749	4053
Rab5	FBgn0014010	10016	10107	9743	10016	11838	10948	12055	10341	10017	13006	14785	13267	9294	13918	10974	12282	11599	14555	10115	13181	14850	13417	11757	14334	11313	11662	7124	15627	12246	10342
Rac2	FBgn0014011	1237	1336	1229	1376	1522	1290	1657	1393	1215	1582	1806	1563	1076	1863	1335	1618	1284	1819	1284	1920	1953	1807	1363	2027	1314	1226	971	1823	1616	1455
Rel	FBgn0014018	3525	3497	3633	3315	3366	3332	3272	2846	3220	3447	4012	3419	3804	4295	4460	3965	4904	5868	2811	3258	5184	4007	3330	4659	4135	4010	2054	4649	4013	3795
Rh5	FBgn0014019	7738	8883	7452	8066	8227	8119	9289	8248	7250	10235	12162	10819	11107	13886	6722	9299	11310	13167	6901	11522	9630	10766	10626	14081	6745	7739	5321	11541	9421	7012
Rho1	FBgn0014020	8500	8493	8022	8522	9784	8555	9379	8181	7622	9736	11479	10275	6280	12019	8060	10343	9117	12863	7889	11502	11957	10971	8875	11114	9036	9661	5359	12633	9440	8202
Rlb1	FBgn0014022	241	234	190	260	261	245	294	243	225	297	289	326	173	394	239	305	235	312	233	363	342	385	227	365	206	257	147	348	256	220
mRpL47	FBgn0014023	546	576	528	608	593	527	669	600	545	763	678	719	560	796	548	791	533	809	517	738	721	767	576	790	507	599	445	684	592	519
Rnp4F	FBgn0014024	1227	1203	1083	1210	1427	1240	1539	1245	1199	1637	1579	1597	903	1646	1108	1427	1152	1522	1044	1635	1787	1770	1260	1693	1092	1250	880	1669	1374	1063
RpL7A	FBgn0014026	49546	49115	61248	58877	55842	53881	57783	43498	52553	62617	72120	66746	69658	60657	49607	56962	56432	71031	43982	61271	73412	63974	59627	64189	59906	68423	43215	79413	63605	39473
SdhB	FBgn0014028	6913	7405	6641	7416	7632	7211	9683	8180	6968	9720	9123	9234	7090	11270	5811	9609	6702	11465	4985	11240	9067	10572	6510	10636	5560	6937	5187	10114	8316	5808
2016-09-02	FBgn0014029	1350	1328	1175	1238	1252	1275	1560	1274	1110	1590	1477	1480	1389	1957	1173	1499	1453	1825	1098	1979	1759	1768	1273	1840	1096	1243	830	1635	1501	1159
Spat	FBgn0014031	7374	6291	5669	5504	5982	5148	5581	3050	5813	6021	7214	5714	6303	4360	4493	3477	4626	4931	4319	4101	7808	4638	5352	4805	5211	5877	3991	6084	6843	3737
Sptr	FBgn0014032	996	922	816	937	990	940	1163	834	988	1308	1355	1244	807	1256	752	973	765	1068	820	1101	1145	1050	840	1066	779	979	664	1063	1071	836
Sr-CI	FBgn0014033	1305	1088	1284	1431	1737	1552	971	531	1266	1576	1942	1735	939	1458	1154	1079	859	1049	1023	1164	2324	1639	1302	1371	1087	953	685	1315	1082	926
Su(Tpl)	FBgn0014037	4081	4060	4045	4199	4833	4874	5263	4699	4162	5379	5753	5123	2873	5553	3746	4545	4226	5599	3598	5682	5823	5915	4594	5910	4140	4496	3291	5836	4954	3872
Tie	FBgn0014073	1447	1541	1445	1453	1678	1586	2070	1732	1427	2054	2005	1927	1284	2642	1592	2151	1600	2280	1172	1940	1929	1785	1612	2319	1407	1671	969	2262	1828	1591
Ugt	FBgn0014075	2441	2477	2163	2416	2637	2424	2839	2412	2246	3094	3262	3312	1584	3404	2031	2651	1970	2965	1994	2926	3347	3032	2496	3339	2056	2320	1785	2771	2519	2492
Vm32E	FBgn0014076	12	0	0	2	0	0	0	0	9	2	3	2	2	6	0	2	0	0	2	1	4	4	2	3	1	6	0	2	7	2
CG4278	FBgn0014092	285	283	311	309	297	288	323	272	236	365	373	387	317	373	308	337	307	356	303	366	420	400	300	343	355	349	199	381	322	299
barr	FBgn0014127	215	218	218	226	265	249	266	208	196	281	305	267	229	404	208	264	263	301	195	332	299	300	239	309	208	245	143	327	271	202
bif	FBgn0014133	7549	7219	6381	6829	7381	7865	9718	8199	6323	8763	9268	8902	6227	10330	6096	7951	8614	10755	5941	9588	9695	9939	7459	10397	6942	7824	5349	11296	8582	6718
bnl	FBgn0014135	278	316	279	339	293	323	406	544	316	395	437	354	272	463	322	455	285	495	274	485	403	432	300	489	259	259	222	449	278	333
cher	FBgn0014141	4502	5143	4751	4779	5589	5177	5685	6065	4272	5787	5883	5211	3530	6917	4218	6623	4797	7535	3360	7275	7064	7442	4246	6420	4483	5012	3536	6496	5355	4625
croc	FBgn0014143	70	63	62	60	69	70	84	66	66	69	78	72	48	105	44	87	55	67	50	70	82	84	58	93	54	62	45	90	64	52
fax	FBgn0014163	6988	7262	7022	7674	8724	8252	9176	8503	6248	9669	9586	9684	6735	12417	8085	10023	8356	12828	7242	11999	11075	12751	7986	11893	8145	8647	5043	10104	8963	8635
gcm	FBgn0014179	5	3	10	3	5	6	11	9	3	7	5	5	2	6	7	13	8	10	6	13	9	7	4	4	7	3	1	5	7	4
Oda	FBgn0014184	32366	34190	34374	35499	40913	37697	40819	37282	32946	42379	46652	43288	38377	52269	38496	48189	43399	58145	32736	49602	47463	49307	39074	53029	42653	45027	26548	58053	44511	36662
Hel25E	FBgn0014189	2099	2171	2090	2259	2334	2221	2512	2063	2086	2864	2825	2718	2175	2885	2070	2405	2174	2590	1877	2555	3143	2619	2183	2678	2027	2231	1594	2837	2442	1952
prod	FBgn0014269	675	660	624	690	718	641	768	663	624	854	926	873	693	980	678	834	674	1007	546	974	911	948	709	992	634	735	492	959	827	601
mof	FBgn0014340	218	207	213	225	245	245	284	234	196	286	343	276	227	332	198	229	253	319	190	317	299	339	235	307	206	259	150	339	275	196
mia	FBgn0014342	90	67	70	85	96	93	124	85	65	129	93	128	76	182	83	119	91	148	84	166	124	164	80	161	88	95	64	120	127	94
mirr	FBgn0014343	310	294	269	293	364	333	414	353	312	418	452	402	217	536	305	432	364	492	276	509	458	454	397	516	346	336	291	478	453	333
noi	FBgn0014366	527	510	523	546	551	497	605	519	479	680	626	625	552	725	549	590	552	622	460	631	710	695	554	633	529	579	374	650	607	472
nol	FBgn0014368	3	5	4	5	6	8	9	13	6	9	3	10	4	4	6	6	5	7	2	5	8	11	8	5	5	4	5	4	5	6
RhoL	FBgn0014380	593	712	512	593	637	538	694	548	503	721	731	670	569	835	514	680	522	827	540	779	845	705	528	717	507	570	407	826	666	532
sty	FBgn0014388	2175	2377	2089	2160	2476	2453	2736	2622	2209	2987	2733	2751	1637	3639	2224	3210	2322	3669	1979	3398	3313	3529	2590	3625	2301	2475	1753	3151	2424	2625
sun	FBgn0014391	3564	4052	3704	4073	4084	3592	4754	3726	3657	5063	4661	4743	4064	6275	3057	5415	3003	6274	2915	5686	4738	5207	3488	5388	2838	3390	3041	4664	3971	3229
tilB	FBgn0014395	13	10	23	29	16	30	26	24	18	15	27	33	27	48	22	27	15	23	18	25	28	32	28	26	20	29	13	29	17	26
tim	FBgn0014396	2864	1960	1947	2002	1975	2236	4916	2467	2546	2482	2675	2120	1552	2577	2446	2071	2029	1989	3322	2736	4383	2492	2717	2848	1758	1706	1680	2944	2841	2131
Vps26	FBgn0014411	1761	1813	1673	1902	2088	1917	2174	1917	1704	2382	2437	2387	1559	2652	1682	2230	1875	2452	1527	2498	2466	2521	1812	2458	1720	1862	1333	2436	2148	1711
CG13397	FBgn0014417	587	588	660	731	745	640	767	527	645	774	835	758	630	671	673	630	607	646	717	739	954	779	732	757	571	666	456	845	797	531
CG11899	FBgn0014427	3322	3610	3391	3488	3311	2959	3163	2253	3173	4347	4225	3827	5701	3909	3173	3074	3462	4033	2805	2808	4942	3586	2907	3628	3664	4855	2445	3816	3374	2913
Acp1	FBgn0014454	447	743	279	399	243	241	445	1108	238	1496	234	790	43	3456	67	2189	93	3644	91	2692	181	1951	229	3083	139	238	235	233	255	793
Ahcy13	FBgn0014455	2588	2673	2800	2716	3112	2487	2763	1726	2615	3175	3091	2957	2822	2349	2281	2197	2188	2761	2091	2284	3961	2949	2738	2703	2349	2792	2106	2823	2593	1509
Cp7Fa	FBgn0014464	66	37	68	63	64	61	41	51	23	45	57	54	40	54	40	35	44	48	32	32	60	47	42	58	72	68	45	79	74	63
Cp7Fb	FBgn0014465	36	18	35	54	45	47	33	40	40	26	67	49	18	56	19	43	26	40	16	26	31	23	28	32	65	60	39	50	80	38
Cp7Fc	FBgn0014466	12	6	18	27	22	17	9	15	24	9	23	24	7	24	3	11	4	8	5	9	14	9	3	13	32	27	16	34	54	19
Cyp4e2	FBgn0014469	5119	4974	4372	4172	5198	4236	5335	3702	4556	5052	6576	5135	3917	4482	3901	4177	3825	4712	4052	4055	5716	3743	4045	4270	4464	4704	3269	6487	6198	4514
Eig71Eh	FBgn0014848	0	0	0	0	0	0	0	0	0	0	0	0	0	0	0	0	0	0	0	0	0	0	0	0	0	0	0	0	0	0
Eig71Ei	FBgn0014849	0	0	0	0	0	0	0	0	0	0	1	0	0	0	0	0	0	0	0	0	0	0	0	0	0	0	0	0	0	0
Eig71Ej	FBgn0014850	0	0	0	0	0	0	0	0	0	0	0	0	0	0	0	0	0	0	0	0	0	0	0	0	0	0	0	0	0	0
Eig71Ek	FBgn0014851	0	0	0	0	0	0	0	0	0	0	0	0	0	0	0	0	0	0	0	0	0	0	0	0	0	0	0	0	0	0
His3.3A	FBgn0014857	3046	3127	2741	3021	2935	2874	3247	2624	2345	3362	3110	3293	3897	4714	3174	3991	3412	4619	2246	3983	4419	4563	2907	3878	2733	3295	1845	4076	3436	2602
Hr38	FBgn0014859	1431	897	1225	853	1126	1224	1633	1543	1169	961	882	943	534	1407	1351	1662	879	1452	1020	1526	2259	1441	1456	1846	1049	1055	643	974	981	1215
Mcm2	FBgn0014861	103	133	100	126	96	120	108	80	106	202	182	182	69	134	69	140	81	130	73	156	149	176	105	157	73	102	61	91	126	121
Mlp84B	FBgn0014863	8745	8898	9307	9779	11888	11183	12190	12274	9493	11679	12833	12089	7542	14825	8725	12351	9230	19802	7778	17178	13520	15883	7314	14361	10252	11887	7196	15955	13081	9420
Mtk	FBgn0014865	413	307	2032	782	890	555	968	575	916	1379	747	606	3604	1707	2469	397	2351	1553	2276	1675	1628	794	506	1306	2153	1011	1417	345	1687	1864
Ost48	FBgn0014868	1723	2060	1829	2113	1838	1830	1972	1510	1733	2502	2354	2464	2053	2475	1570	1999	1548	2122	1501	2082	2358	2207	1570	2279	1315	1790	1324	1909	1833	1466
Pglym78	FBgn0014869	8935	9019	7585	8284	9481	8197	11379	9496	8643	11925	12705	11834	7758	13945	6789	11486	7354	13151	6647	13771	10730	12886	7764	12381	7732	8622	6360	11102	10633	7845
Psi	FBgn0014870	2392	2106	2130	2223	2623	2675	3100	3172	2133	3166	3015	2971	1646	3726	2382	3205	2214	2976	2096	3580	3124	3288	2713	3512	2331	2405	1861	2860	2627	2395
Roe1	FBgn0014877	800	752	704	805	876	816	1028	824	804	1117	876	982	630	1175	598	889	682	1126	750	1293	1126	1196	743	1121	613	778	522	995	916	706
Set	FBgn0014879	728	712	620	711	758	674	847	714	684	951	935	991	564	1060	682	835	657	889	705	1004	906	955	671	854	591	704	405	867	821	640
CG14630	FBgn0014903	0	0	0	0	0	0	0	0	0	0	0	0	1	0	0	0	0	1	0	0	1	0	0	0	0	0	0	0	0	0
Hydr2	FBgn0014906	1958	2106	1991	2259	2724	2469	2557	2200	1758	2448	3029	2752	1959	2816	2051	2475	2544	2989	2022	3113	3149	2912	2180	2936	2117	2274	1585	3173	2810	2175
CG2846	FBgn0014930	1234	1463	1320	1466	1608	1508	1552	1211	1191	1729	1823	1758	1439	1999	1327	1717	1298	1990	1118	1763	1816	1798	1276	1814	1466	1665	1005	1969	1657	1294
CG2678	FBgn0014931	115	96	107	107	128	92	108	84	68	83	156	139	110	98	101	83	96	93	89	97	120	116	122	96	137	154	74	140	112	60
btn	FBgn0014949	0	0	1	1	1	2	1	0	0	0	3	1	0	0	0	0	1	2	0	0	1	0	1	0	0	0	1	0	1	0
betaggt-I	FBgn0015000	513	584	535	608	649	714	664	586	539	778	932	821	552	1013	586	763	652	959	589	814	906	935	765	859	622	752	482	910	736	615
iotaTry	FBgn0015001	12	8	12	7	9	6	7	5	2	6	15	16	6	19	19	34	3	13	8	14	8	15	12	14	4	3	4	10	10	5
Actn3	FBgn0015008	4	1	0	0	1	1	0	1	0	0	0	0	0	0	0	0	0	1	1	0	0	0	0	1	0	0	0	2	0	0
Ag5r	FBgn0015010	221	451	356	142	213	453	368	174	196	215	1055	493	40	102	277	191	16	127	643	489	271	16	794	124	704	761	956	518	672	585
Ahcy89E	FBgn0015011	466	468	540	547	670	547	635	526	438	682	784	690	540	745	406	590	558	728	398	643	796	708	529	680	423	526	382	866	601	453
Cctgamma	FBgn0015019	1332	1320	1293	1411	1369	1222	1852	1388	1360	2078	1709	1942	1367	2199	1317	1754	1427	2000	1334	2299	2180	2333	1338	1999	1291	1793	848	1679	1434	1129
CkIalpha	FBgn0015024	9513	9883	9326	9672	11045	10687	12107	11063	8650	12600	12494	12371	7783	14095	9498	12423	10271	13926	9898	14910	14894	15288	11455	15557	11455	11977	7182	15135	13451	11935
CkIIalpha-i1	FBgn0015025	96	132	97	136	157	120	147	112	104	175	157	161	114	203	109	161	110	175	107	194	143	195	126	198	126	121	94	171	143	133
cype	FBgn0015031	5345	5768	5442	5686	5993	5316	6612	5221	5442	7061	6534	6897	5178	8099	4187	7241	4485	8589	3910	7819	7177	7833	4912	7282	4206	4771	4448	6986	6266	4421
Cyp4c3	FBgn0015032	229	229	218	208	228	237	255	266	206	321	264	238	228	339	153	269	208	371	156	303	242	289	216	315	194	224	159	301	210	174
Cyp4d8	FBgn0015033	752	717	614	615	836	807	766	491	611	808	1186	934	793	802	690	746	764	853	571	660	1130	800	816	810	814	786	539	1017	822	518
Cyp4e1	FBgn0015034	434	439	312	484	447	423	403	340	366	514	536	539	374	567	431	500	406	569	341	385	665	537	353	488	589	621	245	670	542	529
Cyp4e3	FBgn0015035	1883	1609	1785	2050	2210	1191	555	376	3498	2490	2230	863	541	382	4125	869	2230	959	8238	1337	7447	1071	2560	2122	3048	1597	1751	5422	1732	939
Cyp4ae1	FBgn0015036	9	3	6	5	3	6	4	6	2	3	7	6	4	9	6	4	6	10	5	17	3	6	5	6	12	10	4	7	4	5
Cyp4p1	FBgn0015037	4521	4875	5537	6134	6567	5602	3971	3587	4415	5600	4511	4114	7402	7847	6342	6344	7994	8865	5487	6376	6646	5481	4815	6646	5209	4920	3757	8110	4843	4100
Cyp9b1	FBgn0015038	583	686	698	852	830	706	682	577	630	907	853	780	818	719	953	799	764	683	777	849	787	782	609	849	644	704	437	771	816	675
Cyp9b2	FBgn0015039	6089	5413	3784	4003	3790	3521	3822	1990	4515	4862	6127	4008	6693	5189	3699	2229	6489	4611	4246	2962	7591	4193	3730	2986	4739	5226	3204	5754	6417	3774
Cyp9c1	FBgn0015040	0	0	0	0	0	0	0	0	0	0	0	0	0	0	0	0	0	0	0	0	0	0	0	0	0	0	0	0	0	0
Ddx1	FBgn0015075	500	428	372	440	459	411	508	368	451	634	539	586	302	523	344	450	373	507	322	598	474	556	404	595	369	460	323	550	512	361
eIF-4E	FBgn0015218	6012	6235	5944	6206	7080	6254	7435	6182	5940	7993	8243	8205	4714	9169	5363	7827	5788	9093	5269	8758	8400	8576	6755	8851	5994	6330	4518	8597	6803	5671
Fer2LCH	FBgn0015221	17337	17247	17001	18342	21366	19130	22098	17281	17909	22777	24383	23148	21403	31882	16284	23286	17894	26019	14657	30155	26347	26780	17358	25078	15591	17402	12398	26220	20962	13430
Fer1HCH	FBgn0015222	16148	15558	14727	15689	19095	16147	18606	14332	16068	19986	21991	20307	18129	27334	14936	20245	16162	23372	13216	24232	23449	22651	15195	21457	15373	15908	11607	25106	18750	12352
glec	FBgn0015229	1806	1916	1688	1774	2204	1920	2190	2003	1867	2227	2582	2090	1607	2620	1989	2377	2202	2841	1832	2566	2768	2580	2241	2870	1995	1994	1392	2841	2241	2046
Glut3	FBgn0015230	0	0	0	0	0	0	0	0	0	0	0	0	0	2	0	0	0	0	0	0	0	0	0	0	0	0	0	0	0	0
Hr78	FBgn0015239	1202	1235	1159	1249	1446	1408	1610	1496	1149	1547	1632	1492	1127	1726	1077	1403	1253	1747	1085	1534	1822	1618	1281	1732	1154	1204	891	1651	1388	1182
Hr96	FBgn0015240	925	928	908	985	1094	1035	1184	1019	894	1208	1289	1283	1005	1481	891	1132	1062	1349	900	1397	1521	1380	1056	1418	931	1091	648	1336	1072	779
Hsp60	FBgn0015245	9442	9376	8303	9182	9106	8622	11865	9204	8902	13252	10887	12112	8433	13248	7973	11024	8823	11648	7122	13146	13439	15027	9390	13510	8402	10562	6358	10675	9844	7616
Diap2	FBgn0015247	2654	2726	2963	2947	3047	2755	3477	2947	2618	3784	3404	3589	3506	4394	3148	3534	3388	4112	2793	4141	4154	4082	2863	4073	2926	3421	2033	3889	3355	2555
Nap1	FBgn0015268	60	77	70	69	69	88	59	57	57	73	79	84	87	78	57	73	73	84	52	75	90	107	57	108	74	83	45	88	73	52
Nf1	FBgn0015269	3321	3355	3151	2886	3894	4047	4466	4835	3095	4352	4419	4147	2192	4766	3141	4461	3184	4178	2502	4837	4235	4661	3838	4725	3235	3408	2972	4551	4358	3835
Orc2	FBgn0015270	16	26	12	28	14	16	6	17	25	35	39	29	7	28	11	15	4	23	6	24	17	35	22	37	10	15	10	8	30	14
Orc5	FBgn0015271	33	50	40	42	53	51	71	51	39	68	61	72	53	82	31	58	44	62	39	79	52	78	54	81	40	68	43	70	68	49
Pi3K59F	FBgn0015277	1395	1335	1331	1408	1500	1336	1637	1325	1236	1618	1673	1600	1607	1908	1264	1538	1586	1858	1139	1922	1910	1951	1331	1840	1328	1634	915	2000	1628	999
Pi3K68D	FBgn0015278	1807	1929	1680	1761	2156	2126	2207	1964	1635	2216	2447	2211	1489	2554	1684	2101	1813	2507	1500	2375	2603	2372	1947	2383	2031	2077	1475	2789	2243	1767
Pi3K92E	FBgn0015279	1469	1579	1627	1628	1838	1698	1865	1664	1478	1990	2125	1972	1334	2295	1656	1830	1848	2312	1413	2265	2316	2207	1627	2288	1791	1890	1203	2479	1987	1624
Rpt2	FBgn0015282	2397	2646	2315	2774	2678	2500	2642	2148	2263	2949	3134	3022	2533	3331	2031	2549	2253	2940	1938	3010	3196	3109	2240	3015	2135	2410	1798	3096	2719	2185
Rpn10	FBgn0015283	2313	2309	2049	2484	2471	2225	2613	2089	2097	2950	2731	2848	1875	3199	1770	2663	2142	2984	1982	3167	3099	3097	2191	3072	2011	2321	1478	3032	2442	1968
Rala	FBgn0015286	1645	1546	1578	1647	1851	1640	1898	1541	1488	1819	2108	1808	1436	2153	1614	1671	1614	2087	1506	1845	2240	1980	1706	2067	1688	1543	1130	1957	1806	1745
RpL22	FBgn0015288	15491	9535	15711	16554	18752	19357	21389	16050	14800	16802	17961	21046	19325	21990	15477	18791	12694	19100	12551	19333	16858	18041	17451	24564	18254	24210	10476	22229	9128	7237
Shark	FBgn0015295	503	445	451	466	503	473	557	464	429	609	602	597	397	645	413	553	439	651	354	642	682	706	452	667	395	486	318	701	507	365
Shc	FBgn0015296	560	573	538	615	673	616	764	627	520	796	833	748	622	884	549	707	667	862	524	881	872	867	648	875	556	661	422	822	730	477
Srp19	FBgn0015298	637	698	635	658	612	597	757	539	591	744	735	825	729	864	584	728	598	764	544	770	892	732	647	822	556	623	466	755	607	479
Ssb-c31a	FBgn0015299	407	401	463	508	478	421	478	386	425	587	476	509	563	669	462	498	421	581	425	554	601	561	455	572	391	447	309	520	378	370
Ssl	FBgn0015300	2	0	1	0	0	2	0	2	1	0	0	1	0	2	1	2	0	2	4	1	4	3	2	0	3	0	1	1	1	0
Try29F	FBgn0015316	56	61	52	46	56	44	60	40	42	81	67	66	49	75	60	50	36	88	51	82	75	79	44	74	44	60	35	66	41	50
Ubc2	FBgn0015320	943	962	865	1041	1177	1030	1205	928	1005	1271	1310	1342	818	1444	947	1127	979	1187	1078	1500	1454	1438	1047	1274	1074	1189	716	1377	1243	1126
Ubc4	FBgn0015321	1315	1257	1189	1307	1375	1242	1496	1219	1254	1893	1681	1913	1214	2171	1281	1739	1213	1755	1270	1958	1951	1945	1230	1815	1230	1472	807	1718	1533	1314
abs	FBgn0015331	489	460	464	463	589	491	610	546	423	667	643	594	468	632	422	536	513	618	406	618	609	682	526	650	416	511	346	654	572	433
CG15865	FBgn0015336	4	24	9	12	15	33	15	11	3	2	41	13	0	2	30	10	0	9	41	15	8	4	46	9	8	12	12	27	37	22
CG5861	FBgn0015338	846	904	848	895	1007	874	1041	818	800	1000	1116	1064	805	1239	782	1115	838	1243	677	1139	1216	1175	868	1280	808	946	576	1134	1030	734
CG14906	FBgn0015351	79	98	82	75	113	78	104	85	66	147	137	131	100	179	109	136	113	119	110	182	142	148	84	118	104	124	57	113	96	76
CG2034	FBgn0015359	375	359	346	365	341	338	469	331	333	464	483	515	406	540	300	462	350	446	317	559	487	522	376	493	328	424	233	457	390	272
oxt	FBgn0015360	1117	1189	1194	1253	1342	1330	1473	1326	1247	1577	1576	1592	1169	1995	1189	1502	1319	1788	1122	1804	1770	1750	1112	1843	1167	1374	875	1753	1458	1195
chn	FBgn0015371	4946	4825	4383	4702	5558	5860	6474	6445	4502	6527	6455	5951	3341	7560	4504	6256	5197	6560	3969	7354	6767	7366	5712	7698	4951	5024	3992	6775	6021	4861
RabX1	FBgn0015372	544	580	520	553	649	575	665	610	505	742	832	712	535	851	606	726	581	787	427	870	829	807	622	833	612	638	370	810	673	562
cutlet	FBgn0015376	62	96	94	84	101	96	52	63	74	123	80	109	38	81	74	98	72	104	77	96	80	94	55	55	93	67	38	74	69	101
dod	FBgn0015379	424	413	378	475	464	396	452	373	401	523	574	538	446	597	401	449	425	554	384	501	559	505	405	548	310	405	305	574	489	319
drl	FBgn0015380	718	659	578	583	709	736	871	785	644	871	853	789	495	1096	604	793	647	863	511	985	920	1032	699	1080	618	648	482	776	810	727
dsf	FBgn0015381	24	19	19	21	39	28	28	34	17	26	33	21	21	32	27	22	17	23	18	33	29	42	31	35	25	15	22	23	24	25
glu	FBgn0015391	269	289	250	249	283	298	450	433	346	534	483	498	186	418	222	354	414	519	339	644	414	442	374	508	329	381	174	362	428	329
hoip	FBgn0015393	419	465	429	408	499	432	579	341	525	581	516	583	359	470	374	542	421	678	388	525	716	841	593	681	560	584	369	577	461	334
jumu	FBgn0015396	207	188	145	145	172	164	176	192	136	201	180	190	132	243	156	217	224	301	137	227	235	194	183	222	154	164	105	202	267	166
kek1	FBgn0015399	1470	1527	1190	1302	1473	1519	1842	1900	1313	1910	1752	1773	934	2126	1254	2030	1446	2069	1184	2062	2024	2318	1623	2423	1393	1481	1060	1926	1774	1577
kek2	FBgn0015400	1310	1368	1232	1273	1519	1621	1673	1830	1328	1987	1708	1710	866	2056	1239	1787	1380	1750	1025	1928	1865	2093	1510	2171	1390	1409	1041	1647	1667	1498
ksr	FBgn0015402	1171	1203	1089	1257	1330	1249	1519	1321	1044	1638	1457	1549	1167	1878	1162	1478	1448	1720	1034	1805	1759	1868	1262	1809	1145	1361	941	1699	1405	1114
Rme-8	FBgn0015477	2187	2292	2186	2094	2540	2493	2730	2377	2172	3050	2966	2683	1620	3145	2036	2598	2224	2836	1822	2848	3218	3061	2501	3156	2200	2411	1797	3016	2568	2152
Cul1	FBgn0015509	4183	4217	3854	4298	4836	4306	5369	4772	4068	5756	5753	5261	3498	6156	4024	5355	4441	6059	3666	6109	5829	5940	4437	6187	4114	4473	3024	6059	4820	4090
mbc	FBgn0015513	5027	5044	4590	4650	5499	5466	5850	4849	4692	5629	6875	5926	3236	5787	4302	4924	4455	5784	4099	5397	6509	5260	4979	5841	4714	5021	3283	6416	5294	4478
nAChRalpha3	FBgn0015519	727	735	739	714	861	981	938	1084	756	1048	930	875	394	1162	577	858	719	951	578	1147	1033	1277	1047	1286	911	770	707	888	952	967
nonA-l	FBgn0015520	448	456	431	399	538	479	631	528	425	598	580	549	394	725	443	576	465	539	395	661	663	682	452	675	457	528	316	609	565	460
RpS21	FBgn0015521	9743	9594	11929	11303	10987	10196	10924	8276	10170	12408	13773	12634	14832	10841	10415	10710	11236	13364	8968	11613	14128	11913	11507	12078	11580	13142	8383	14056	12123	7531
olf186-M	FBgn0015522	860	892	1168	1229	1299	1263	915	959	967	996	1314	1119	1114	1317	969	1079	1142	1736	720	1359	1209	1238	1148	1333	1071	1275	665	1816	1139	900
otp	FBgn0015524	109	105	134	122	157	134	139	183	136	158	143	147	83	207	125	138	117	152	103	201	163	182	118	201	122	114	96	150	144	134
peng	FBgn0015527	770	778	801	877	861	823	913	782	781	992	912	1029	849	1107	893	974	922	1145	712	995	1230	1287	952	1185	950	1051	513	1075	851	720
sda	FBgn0015541	3913	4044	3608	3864	4546	4111	4454	4212	3716	5066	4545	4155	2386	5561	2589	4147	3742	5772	3051	5300	4887	5311	4075	5400	3216	3412	2891	4924	4083	3707
snoRNA:Me28S-A1322	FBgn0015543	25	20	19	19	19	20	25	20	15	26	34	21	5	21	13	18	19	22	19	19	24	26	26	25	13	16	16	24	19	14
spag	FBgn0015544	312	330	253	309	361	295	391	337	306	469	430	435	243	532	275	371	331	390	282	468	455	515	305	456	269	324	212	391	355	326
spel1	FBgn0015546	588	554	617	613	712	666	602	608	490	650	698	623	670	860	647	805	704	992	468	878	840	893	642	840	655	699	371	1014	687	612
tap	FBgn0015550	0	0	1	2	1	2	1	2	4	3	4	1	2	1	1	0	0	3	0	1	2	4	3	4	1	4	1	4	1	4
tos	FBgn0015553	77	73	77	68	84	83	80	90	81	99	141	113	74	88	67	99	91	129	74	103	91	91	100	113	87	92	48	110	100	88
tty	FBgn0015558	2702	2493	2444	2530	2886	3207	3360	3573	2471	3661	3160	3091	1466	3690	2285	3572	2425	3291	2059	3769	3661	3902	2953	4063	2368	2381	2181	3265	3161	2545
unpg	FBgn0015561	13	15	15	7	16	24	22	26	14	21	16	19	7	29	12	18	13	19	10	11	21	12	20	16	17	15	10	28	23	11
alpha-Est1	FBgn0015568	3028	3136	3546	3346	2864	2674	2918	1926	2571	3634	3638	3189	7371	3060	4132	2339	4530	3340	3816	2857	4505	2670	2733	3059	3984	4697	2303	3663	3558	2441
alpha-Est10	FBgn0015569	1500	1352	1132	1188	1781	1316	2124	1161	1246	1508	2160	1548	977	1864	934	1229	994	1274	1060	1243	2110	1198	1203	1187	1019	956	938	1509	1534	1103
alpha-Est2	FBgn0015570	2787	2277	1985	2025	2881	2089	2071	1034	2231	2477	4049	2377	1290	1414	1418	1259	1613	1445	1727	1501	2253	1205	1996	1435	1681	1820	1547	2501	3088	1628
alpha-Est3	FBgn0015571	0	0	0	1	1	0	1	1	0	0	1	0	1	0	3	0	2	0	1	1	1	0	0	1	1	0	0	0	0	0
alpha-Est4	FBgn0015572	37	29	40	22	28	26	27	29	23	36	37	36	37	31	26	26	30	38	25	30	44	39	26	34	31	33	35	40	34	15
alpha-Est6	FBgn0015574	3	4	3	6	3	6	3	7	6	8	5	2	1	9	2	1	3	5	5	7	10	4	4	8	2	6	5	10	10	2
alpha-Est7	FBgn0015575	12217	12619	11172	11999	13261	11501	12562	6583	10715	13253	15471	12526	9071	8769	8306	7201	8612	8638	10370	8200	15528	8275	10715	8911	9207	10343	7928	12778	12097	8222
alpha-Est8	FBgn0015576	4231	4688	4290	4490	5274	4635	4187	3025	3767	4957	7261	5164	3226	3688	3182	3072	3386	3930	3894	3573	5127	3436	4737	3941	3759	3790	3199	5277	5198	3496
alpha-Est9	FBgn0015577	3794	2946	2466	2545	2619	2849	4108	2885	2964	2835	3373	3634	2111	3438	3261	3145	2600	3878	3067	3295	5401	3686	3367	3929	3040	3230	1990	3684	3030	3141
dare	FBgn0015582	328	422	353	425	439	390	429	348	325	501	487	483	379	603	298	442	389	531	326	479	484	510	368	527	365	381	233	490	417	331
Acp29AB	FBgn0015583	0	0	0	0	0	0	0	0	0	0	0	0	0	1	0	0	0	0	0	1	0	0	0	0	0	0	0	0	0	0
Acp53Ea	FBgn0015584	1	0	2	1	0	1	0	2	0	1	2	3	0	0	1	1	1	3	3	1	0	3	0	3	1	1	1	1	0	1
Acp63F	FBgn0015585	4	5	7	4	6	3	4	9	5	7	5	9	11	2	9	6	6	0	8	13	8	3	3	2	13	11	3	13	9	5
Acp76A	FBgn0015586	1	0	0	0	0	0	0	0	1	0	0	0	0	0	0	1	0	0	0	0	0	1	0	0	0	2	0	0	0	0
Apc	FBgn0015589	3943	3950	3756	3508	4409	4729	5207	5189	3628	5441	5177	4919	2929	5645	3520	4868	4088	4972	2934	5560	5501	5857	4560	6060	3843	4096	3261	5064	4776	3784
AstA	FBgn0015591	815	756	570	635	797	669	906	790	658	891	925	897	572	1045	663	831	827	951	626	1115	969	963	850	1256	723	686	508	998	1006	696
toc	FBgn0015600	4713	4876	4352	4427	5322	5373	6029	5867	4799	6406	6122	5765	3518	7301	4377	6240	5156	7072	3550	6512	6757	7078	5380	7460	4590	4778	3746	6472	5793	4840
BEAF-32	FBgn0015602	613	590	571	602	664	578	763	577	495	753	807	733	508	862	606	730	601	777	572	778	838	799	615	824	569	602	375	761	671	540
CadN	FBgn0015609	3847	3771	3620	3347	4098	4709	5117	5726	3711	5350	5039	4662	2119	5221	3060	4968	3654	5133	2469	4835	4830	5568	4697	6270	4010	3957	3449	4797	4750	4435
CanB2	FBgn0015614	1691	1723	1721	1769	2018	1870	1939	1654	1558	2183	2241	2179	1558	2623	1820	2177	1669	2454	1745	2422	2416	2346	1857	2326	1979	2004	1186	2378	2138	1865
SMC3	FBgn0015615	1086	1098	1025	1133	1352	1204	1374	1248	1039	1501	1491	1468	933	1627	1098	1337	1268	1603	980	1570	1485	1697	1210	1612	1210	1206	849	1465	1294	1134
Cdk8	FBgn0015618	105	111	108	126	110	127	148	115	105	154	154	144	105	188	97	146	133	153	120	152	163	205	101	172	98	145	91	184	165	81
Clp	FBgn0015621	94	95	97	112	90	94	122	90	104	141	137	120	150	159	89	129	126	123	86	131	140	144	111	126	95	115	80	140	123	72
Cnx99A	FBgn0015622	6862	6662	5996	6242	6736	6387	8223	6477	5885	8793	7994	8873	5022	10089	5760	7762	6027	8690	5689	9129	9434	9542	6380	8811	5719	6754	4080	7814	6959	5869
Cpr	FBgn0015623	9951	9480	9403	9547	10635	8737	11819	8553	10359	13701	12979	12281	9605	13880	10763	10472	10889	11442	10377	12368	13361	11810	9276	11788	9083	10619	6444	11506	11359	8834
CycB3	FBgn0015625	33	27	19	27	41	29	25	23	56	32	137	39	26	54	26	46	51	50	29	41	46	54	32	43	29	43	23	41	116	37
Dot	FBgn0015663	414	423	379	427	430	385	642	495	439	565	687	614	400	593	423	511	497	569	431	519	648	553	453	617	412	502	318	664	563	497
Dref	FBgn0015664	871	938	886	937	1146	1002	1124	1062	871	1137	1207	1189	786	1288	850	1196	1019	1332	811	1300	1222	1364	1030	1360	917	1059	624	1242	1182	995
Cyp6a17	FBgn0015714	2554	2565	2824	2857	3105	2752	2916	2526	2099	2771	3890	3107	2419	2866	3065	3220	2305	3148	2576	3842	3582	3136	2512	2941	3029	3297	1496	4511	2679	1993
ktub	FBgn0015721	282	232	238	238	301	306	327	353	260	377	317	319	216	378	241	378	298	400	252	443	357	384	279	434	273	265	198	427	327	284
Hmu	FBgn0015737	4665	4912	4303	4632	5408	4973	5346	3903	4281	6012	6175	5951	3045	6269	3457	4837	3958	5666	3553	5753	6415	5972	4456	5805	3788	4817	3131	6241	5295	4266
Lis-1	FBgn0015754	7424	7676	7305	7491	9001	8361	9102	8753	7155	9917	10320	9669	6921	11792	7804	10100	8452	10925	7128	11169	10342	11012	8102	11494	8301	8260	5649	10429	9579	8417
RpL9	FBgn0015756	24336	23418	28057	26666	27017	24167	26079	19464	24831	30789	34322	31521	28208	26180	21085	26502	24611	33559	21073	27375	35189	30430	27461	28679	27803	32653	20669	36844	29208	19090
p38a	FBgn0015765	267	334	319	347	408	370	408	318	269	368	198	265	334	517	309	432	393	562	284	420	464	439	402	521	357	413	275	538	408	311
Msr-110	FBgn0015766	68393	76255	68250	77721	87386	86806	88622	71437	70795	94693	99921	98704	59304	104924	60310	93231	75559	119854	54698	109188	92865	94754	71299	101736	70517	81402	53382	121593	90829	68352
MstProx	FBgn0015770	0	0	0	0	0	0	0	0	0	0	0	0	0	0	0	0	0	0	0	0	0	0	0	0	1	0	0	1	0	0
Nak	FBgn0015772	3524	3773	3548	3530	4298	4279	4432	4322	3363	4645	4983	4611	2933	5443	3782	4717	4375	5832	3240	5142	5411	5573	4214	5551	4314	4094	2846	5792	4779	3963
NetA	FBgn0015773	216	224	228	254	270	269	224	236	211	275	320	278	160	300	200	244	245	340	134	289	271	297	279	361	226	209	156	224	262	216
NetB	FBgn0015774	2180	2263	2020	2024	2618	2647	2753	2900	2174	3075	2824	2583	1454	3517	1884	2851	2066	2866	1700	3244	2755	3162	2616	3745	2214	2176	1906	2620	2740	2629
nrv1	FBgn0015776	7006	7439	6426	6732	8107	7330	8787	7117	6809	8930	9461	8537	5922	10530	6601	8475	7092	10697	6268	9333	9762	9309	7317	9736	7712	8218	5359	10688	8062	7390
nrv2	FBgn0015777	14466	16509	13296	15130	17186	15143	18562	16694	13303	19170	20347	20084	10849	24926	12345	21221	14149	26934	12754	24247	19631	22567	15311	25252	14439	15477	10797	21905	16930	16406
rin	FBgn0015778	3797	3596	3578	3709	4210	4034	4778	4036	3631	5416	5261	5104	2566	5251	3523	4325	3617	4734	3568	5639	5587	5668	4528	5443	3910	4296	2884	4777	4658	3844
P5cr	FBgn0015781	1222	1119	1018	1035	1038	924	1158	810	1099	1461	1289	1265	757	1104	859	957	810	1077	947	1084	1405	1187	958	1105	883	1098	690	1095	1089	853
Rab10	FBgn0015789	3172	3334	3445	3684	4007	3648	3909	3410	3057	4198	4432	4110	3823	5290	3367	4128	4086	5460	3104	4545	4660	4493	3585	4627	3449	3833	2629	5510	3918	3233
Rab11	FBgn0015790	6424	6959	6098	6672	7397	6711	7846	6642	5909	8258	8543	7966	5339	9137	5891	7713	6453	9156	5651	8618	8928	8787	6384	8586	6104	6558	4448	8849	7170	5908
Rab14	FBgn0015791	3289	3143	3217	3430	3882	3660	3864	3447	3082	3917	4477	4004	2948	4447	3310	3780	3493	4471	3184	4473	4735	4556	3741	4822	3496	3793	2275	5148	4344	3223
Rab19	FBgn0015793	409	409	435	424	505	405	498	417	389	539	600	560	409	638	395	532	438	637	405	678	622	609	483	605	463	453	281	654	497	408
Rab18	FBgn0015794	1179	1126	1289	1243	1323	1288	1345	1116	1130	1331	1610	1371	1419	1764	1253	1419	1345	1961	1059	1656	1785	1567	1283	1611	1217	1306	765	1827	1484	1048
Rab7	FBgn0015795	6724	7272	7581	8126	9267	8725	8251	7602	7219	9379	11399	9818	8043	11010	8270	9481	8579	11260	7520	10544	10131	10266	8001	10540	8857	9081	4950	12072	9464	7708
Rab6	FBgn0015797	1610	1718	1628	1844	1910	1731	1992	1561	1480	1899	2060	1950	1543	2405	1552	1920	1689	2277	1506	2239	2235	2215	1495	2208	1415	1690	1214	2122	1714	1430
Rbf	FBgn0015799	1249	1291	1205	1208	1422	1323	1630	1408	1075	1571	1521	1494	997	1786	1188	1509	1351	1713	1054	1760	1785	1895	1223	1675	1162	1370	886	1619	1516	1250
Reg-5	FBgn0015801	2024	2191	2181	2549	2926	2725	2678	2459	1994	2774	3218	2623	2840	3457	2065	2781	3221	4129	1838	3550	2997	3296	2371	3344	2401	2693	1744	4437	3124	1887
RtGEF	FBgn0015803	1320	1372	1364	1413	1544	1468	1791	1558	1295	1704	1801	1694	1229	2148	1373	1705	1623	2116	1260	2008	2131	2072	1471	1995	1387	1454	994	2087	1648	1223
HDAC1	FBgn0015805	935	1023	901	1046	1204	1034	1313	1004	889	1645	1272	1402	855	1408	855	1091	1012	1151	921	1387	1353	1410	1077	1303	771	1056	754	1143	1127	842
ScpX	FBgn0015808	3535	3282	3213	3209	3616	3308	3790	2689	3100	4048	4005	3824	3195	4389	2650	3200	2617	3568	2542	3595	4434	3827	3063	3735	2614	3016	2169	3792	3742	2617
Spx	FBgn0015818	273	255	239	268	300	241	325	261	246	409	417	364	287	421	272	332	308	383	263	363	418	368	292	377	259	348	198	349	283	252
TfIIEalpha	FBgn0015828	537	549	591	629	596	573	712	571	579	713	770	742	781	877	604	707	653	796	565	864	847	802	569	795	565	715	448	818	628	485
TfIIEbeta	FBgn0015829	524	512	501	535	570	521	712	478	506	659	659	669	570	740	479	651	532	729	527	763	696	701	575	719	548	541	360	737	590	489
Rtnl2	FBgn0015831	1	1	2	2	0	0	4	1	0	2	4	4	3	4	1	2	0	0	11	2	3	1	0	3	3	1	0	5	1	2
Trip1	FBgn0015834	5097	4977	6055	6046	5968	5607	6235	5135	5255	6764	7961	7857	6896	7340	5131	6907	6063	8794	4575	7438	7566	7569	6364	8042	5931	6674	4327	8783	6127	4312
Vang	FBgn0015838	453	446	377	456	524	475	510	474	377	535	573	595	416	730	450	538	537	608	421	664	602	689	464	647	430	473	318	641	519	458
Drip	FBgn0015872	2120	2644	2255	2736	3092	2948	2533	2541	2439	2866	3374	2827	2345	2973	1983	2993	2953	3827	1804	2884	2654	2610	2284	3233	2643	2740	1768	3987	3198	2444
apt	FBgn0015903	515	528	454	485	602	566	595	582	532	601	661	622	362	772	496	612	463	844	430	782	827	722	553	700	491	592	337	796	626	581
ara	FBgn0015904	117	161	111	121	142	172	202	133	139	154	214	205	111	185	132	151	131	158	136	202	177	173	277	191	141	184	140	208	173	143
ast	FBgn0015905	287	301	268	306	331	320	356	299	261	388	329	336	240	330	227	239	275	363	267	328	424	428	306	371	337	364	161	376	348	261
caup	FBgn0015919	201	254	219	208	270	273	275	272	211	249	384	284	150	298	215	278	185	289	199	310	270	282	331	290	202	274	193	307	325	216
crq	FBgn0015924	5204	5012	4961	5069	5805	5160	5841	4658	4558	6093	6755	6028	4858	7095	4977	5431	4941	6377	5179	6086	7266	6137	5008	6394	5405	5716	3653	7138	5969	5098
csul	FBgn0015925	237	208	194	207	257	189	290	229	219	294	292	276	173	322	215	236	235	283	212	276	332	299	224	330	195	249	150	271	231	171
dah	FBgn0015926	12	2	8	3	3	3	5	5	13	2	45	2	4	3	5	3	8	10	2	11	12	9	4	8	4	5	1	3	35	1
dpa	FBgn0015929	133	185	166	178	184	161	160	180	175	318	250	254	163	272	115	153	143	203	130	177	274	299	214	241	117	165	105	167	225	174
grim	FBgn0015946	11	3	4	1	8	7	5	4	3	1	6	6	4	9	1	4	4	6	6	7	9	10	8	10	3	5	4	4	3	5
hrg	FBgn0015949	2884	2957	2816	2948	3577	3312	3564	3431	2735	3939	3974	3750	2397	4466	2953	3670	3314	4233	2671	4396	4238	4259	3479	4465	3039	3371	2275	4483	3617	2948
Faa	FBgn0016013	788	831	953	896	1051	987	905	675	886	1160	1258	1050	1213	1319	879	875	861	1175	726	891	1372	970	983	1066	992	1134	773	1429	1131	924
lama	FBgn0016031	3476	3891	3332	3752	3611	3105	4931	4018	3892	4451	4700	4728	2667	5356	3038	4197	3228	4651	3231	4624	5302	5496	3199	4243	3637	3915	2794	5122	3935	3271
lbm	FBgn0016032	558	600	567	596	588	571	669	578	514	670	664	661	544	857	457	783	632	947	491	832	781	768	512	783	549	576	416	870	644	496
mael	FBgn0016034	34	37	27	31	40	36	42	41	33	43	38	34	24	51	23	34	34	40	17	36	33	42	27	56	25	29	18	32	37	34
mei-P22	FBgn0016036	2	7	3	3	8	7	2	6	4	5	8	4	1	3	4	5	5	8	1	3	9	7	1	7	1	4	2	3	10	9
mod(r)	FBgn0016038	995	1110	1009	1096	1177	1061	1312	1110	1047	1393	1431	1432	1277	1662	1038	1433	1257	1659	1000	1471	1641	1578	1241	1732	1167	1275	809	1753	1184	1025
Tom40	FBgn0016041	1765	1873	1588	1634	1847	1773	2337	1999	1813	2573	2220	2490	1458	2819	1698	2468	1712	2913	1685	2826	2724	3062	2091	2865	1859	2054	1294	2419	1998	1889
nompA	FBgn0016047	124	129	153	174	157	143	152	154	131	187	206	170	106	181	115	189	136	203	94	158	211	183	147	229	124	130	121	182	152	128
pgc	FBgn0016053	7	3	3	2	4	4	4	4	11	1	39	2	1	4	2	3	8	3	2	1	4	5	3	5	0	4	1	3	34	4
phr6-4	FBgn0016054	39	65	49	52	59	60	57	56	75	75	62	66	58	79	56	76	59	84	56	78	78	93	78	112	67	66	30	96	82	57
Sema-1b	FBgn0016059	2685	2907	2615	2802	3372	3126	3433	2906	2652	3384	3895	3364	2234	3567	2598	3440	3011	4115	2410	3539	4066	3599	2771	3853	2861	3221	2180	4327	3346	3136
side	FBgn0016061	1479	1490	1312	1391	1642	1849	1871	1994	1317	1958	1803	1756	934	2300	1275	1912	1390	1749	1093	2060	1888	2115	1670	2317	1491	1491	1191	1757	1717	1534
smg	FBgn0016070	1603	1603	1712	1678	1870	1926	1807	1800	1725	2015	2588	1965	1137	2144	1418	1930	1652	2224	1258	2147	2277	2152	1841	2246	1698	1707	1320	2326	2109	1644
vkg	FBgn0016075	8311	8702	7494	8188	8827	8819	9683	7867	7273	9820	9216	9037	4334	11257	4467	7949	4953	9618	4822	10399	10033	11437	7361	10590	5979	7721	6103	9328	8749	7308
vri	FBgn0016076	777	1182	769	1215	1177	1715	1041	962	805	1043	1659	1058	1170	1111	932	1128	1860	1749	696	1242	1304	1181	915	1305	895	1148	703	1885	1659	1039
wun	FBgn0016078	1791	1954	1691	1761	2104	1822	2111	1890	1616	2311	2230	2126	1748	2789	1791	2244	2112	3014	1718	2643	2498	2339	1821	2600	1814	1869	1447	2779	2069	1716
xmas-1	FBgn0016080	50	62	60	67	60	36	65	56	42	90	80	70	39	86	58	52	47	74	49	79	77	99	55	74	50	60	35	68	64	57
fry	FBgn0016081	10897	11319	11008	10443	12547	12595	13932	12938	9825	13506	14991	13811	8063	13694	8536	11921	11906	14997	7012	12318	14334	13945	11780	14570	10107	11463	9122	15061	11783	9349
ATPsynCF6	FBgn0016119	6084	6618	6102	6873	6683	6018	7957	6677	6040	8625	7829	8096	6079	9529	5113	8825	5121	9993	4816	9779	8666	9476	6056	8881	5073	6070	4479	8183	7088	5361
ATPsynD	FBgn0016120	8973	9768	8843	9756	9421	8845	11946	9577	9151	12545	11092	11785	8584	13551	7159	12739	7809	15158	6438	13772	11422	13311	8086	12731	6773	8247	7123	11582	9921	7292
Acer	FBgn0016122	10220	10353	9134	10201	10841	10500	9633	5245	9004	11231	13795	11572	8725	9818	6259	6422	8421	8391	7877	7567	12553	8369	8559	8694	8177	9901	6897	12278	10719	7481
Alp4	FBgn0016123	1861	1866	1906	1821	1519	1557	2291	1839	1531	2034	2190	1990	2051	2551	1899	2546	1889	2622	1499	2461	2901	2883	2042	2736	1690	1797	1033	2445	1699	1162
CaMKI	FBgn0016126	10610	10010	10617	10005	11990	11294	11567	10375	10025	12140	14317	11978	10749	12533	12682	10856	11338	12380	11684	11311	14947	11432	11981	13019	13174	12752	7356	14361	12828	11577
Cdk4	FBgn0016131	579	533	561	621	621	598	674	500	560	672	738	761	390	586	481	605	481	762	448	724	704	756	513	629	424	452	333	615	450	408
PTP-ER	FBgn0016641	2013	1955	1827	1886	2339	2137	2571	2358	1851	2652	2644	2512	1449	2891	1800	2407	2068	2587	1569	2783	2941	2990	2193	3046	1923	2101	1508	2669	2270	1900
Lgr1	FBgn0016650	917	960	952	974	1136	1089	1260	1193	968	1314	1470	1294	772	1383	856	1271	834	1122	858	1414	1425	1629	877	1179	712	821	571	1054	1016	846
H15	FBgn0016660	115	136	112	142	131	157	149	129	143	160	136	176	107	198	100	161	164	202	95	171	186	201	133	248	149	150	96	211	142	166
Ipp	FBgn0016672	10003	10030	9495	9701	10609	10282	10941	9312	9299	12045	13392	13156	8789	12154	8187	11148	10290	14724	7624	13392	12849	13126	10359	13689	9687	10229	6352	13646	11732	7955
Lectin-galC1	FBgn0016675	4	3	3	2	4	8	11	8	2	5	9	4	0	2	4	12	1	9	4	2	10	8	2	5	6	5	5	6	5	3
NaPi-T	FBgn0016684	19	20	13	18	20	21	10	21	14	22	51	20	20	27	13	29	20	27	19	27	27	15	13	29	24	35	30	58	29	23
Nlp	FBgn0016685	1337	1462	1316	1330	1640	1410	1525	1195	1449	1795	1790	1807	1295	1766	1243	1548	1242	1887	1245	1611	2032	1912	1609	1932	1417	1537	1035	1777	1514	1140
Nurf-38	FBgn0016687	7915	8005	7751	7556	7877	7002	8452	5693	7424	9582	8971	8941	6742	8457	6017	6912	5729	8709	6287	7943	10411	9428	7409	8155	6806	7671	5203	8154	7309	5801
ATPsynO	FBgn0016691	9357	9967	9565	9991	10062	8968	12121	9621	9028	12723	11895	12044	9045	14081	7280	12132	7575	14774	7170	13319	11744	12594	8416	12385	7821	9069	7926	11605	10234	8630
Past1	FBgn0016693	3159	3336	3099	3214	3425	3087	3889	3117	3155	4247	4135	4242	2564	4558	2778	3682	3075	4242	2844	4651	4393	4087	3157	4483	2850	3268	2250	3988	3513	2918
Pdp1	FBgn0016694	6669	6619	7627	7581	8835	9099	10229	9294	8414	11194	11023	10370	4905	11169	8723	11199	7976	11726	8197	12268	10916	11522	9333	12873	9352	9013	6582	10321	10146	10464
Pitslre	FBgn0016696	5801	5675	5317	6079	6153	6804	7417	8080	4885	7263	7659	7042	4376	9306	5668	8016	5997	8640	5079	9396	8219	8398	6831	9155	5701	5615	4663	8389	6417	5275
Prosalpha5	FBgn0016697	1521	1659	1459	1616	1731	1547	1710	1224	1383	1793	1925	1873	1548	1904	1319	1729	1451	1899	1396	1783	1939	1745	1456	1776	1413	1482	1107	1840	1746	1325
Ptpa	FBgn0016698	478	512	458	535	504	498	618	504	437	708	614	691	612	762	535	651	576	717	483	705	746	709	476	724	470	599	344	730	594	450
Rab1	FBgn0016700	2164	2304	2202	2283	2586	2418	2642	2497	2194	2809	3106	3080	2411	3886	2492	3209	2582	3630	2249	3514	2991	3189	2488	3474	2470	2562	1597	3427	2646	2391
Rab4	FBgn0016701	1983	1940	2077	2306	2570	2299	2552	2301	2107	2776	2846	2633	2215	3168	2262	2795	2567	3243	1996	2999	3170	2922	2411	3095	1965	2400	1388	3202	2574	1973
Reg-2	FBgn0016715	1331	1277	1131	1194	1060	853	1066	564	961	1362	1723	1508	1201	896	1036	648	1035	916	1206	873	1405	703	1009	781	962	1234	846	1116	1166	714
RpL29	FBgn0016726	8652	8525	10474	9991	10373	9162	9927	7859	10327	11707	12751	12098	13954	11576	10119	11062	10787	13366	9169	10942	12938	10855	10986	11460	10619	11452	7623	13678	10812	7648
sba	FBgn0016754	2506	2317	2194	2283	2754	2751	3241	3054	2354	3207	3193	3171	1810	3734	2172	3031	2435	3517	1882	3555	3423	3763	2798	3650	2384	2564	1922	3428	3055	2302
Usp47	FBgn0016756	5404	5727	5559	5761	6535	6026	7371	6636	5790	7726	7571	7249	5195	8800	5773	7255	6338	8694	5080	8236	9221	8852	6224	8369	5698	6676	3930	8461	6374	5159
angel	FBgn0016762	207	186	168	212	205	180	221	193	152	264	245	261	261	338	202	265	230	329	212	276	275	282	225	310	182	208	148	282	196	206
dos	FBgn0016794	939	982	1028	1088	1185	1114	1101	1156	892	1241	1323	1216	1060	1383	1037	1296	1272	1604	865	1452	1364	1323	990	1432	1086	1162	738	1624	1300	955
fz2	FBgn0016797	3982	3878	3610	3730	4380	4045	4246	3296	3624	4695	5120	4821	2971	4485	3370	4084	3484	4381	3115	4192	4763	4376	4213	4609	3909	4216	2671	5296	4216	3471
Stat92E	FBgn0016917	12795	12499	11603	12255	13415	12932	11454	8362	10979	11632	16108	12730	9240	10868	10476	9314	10222	12080	10036	10255	15604	10949	11406	11028	12100	12449	8591	14414	13424	10924
nompB	FBgn0016919	82	85	84	97	88	106	120	129	81	127	134	117	99	148	71	152	123	174	99	117	131	121	92	135	92	107	60	158	145	88
nompC	FBgn0016920	142	125	139	146	182	185	197	210	131	209	156	175	77	208	94	172	145	225	108	202	214	220	160	238	122	161	124	183	161	133
Pino	FBgn0016926	6658	6998	6419	7253	8111	7627	8840	8750	6727	8755	9048	8250	8368	14096	6421	9571	8731	12149	6482	10882	10350	12272	7520	11289	8000	7879	4573	11427	7432	6762
Dyrk2	FBgn0016930	3153	3244	2680	2855	3394	3307	3831	3695	2838	4042	3963	3980	2259	4846	2719	4156	3061	4515	2675	4387	4161	4854	3178	4880	3421	3539	2300	4299	3907	3598
l(2)k10201	FBgn0016970	79	80	82	95	103	85	92	82	85	137	106	105	111	144	75	98	87	119	77	125	117	133	72	124	101	84	66	128	94	84
swaPsi	FBgn0016974	1	7	2	3	2	3	6	5	2	4	6	1	2	2	4	6	1	6	3	3	6	6	4	5	3	3	1	4	7	4
stnB	FBgn0016975	0	0	0	0	0	0	0	0	0	0	0	0	0	0	0	0	0	0	0	0	0	0	0	0	0	0	0	0	0	0
stnA	FBgn0016976	0	0	0	0	0	0	0	0	0	0	0	0	0	0	0	0	0	0	0	0	0	0	0	0	0	0	0	0	0	0
spen	FBgn0016977	10234	9441	10027	8225	11158	13334	13494	14245	9854	13637	13000	11713	5569	13344	8099	12462	9499	13104	5877	11773	12925	14037	12448	14460	10291	11251	9298	12683	12501	10461
snRNP-U1-70K	FBgn0016978	1154	1037	1075	1217	1240	1236	1610	1463	1045	1531	1494	1561	931	1944	1162	1494	1171	1532	1066	1720	1580	1661	1159	1644	1065	1199	848	1479	1144	927
smid	FBgn0016983	1741	1838	1656	1819	1989	1893	2276	1870	1706	2326	2183	2263	1475	2589	1635	2116	1953	2432	1533	2338	2615	2561	1977	2550	1857	2131	1163	2457	2123	1717
sktl	FBgn0016984	1493	1753	1809	1880	1910	1875	2038	1761	1654	2101	2230	1976	1520	2388	1477	2014	1681	2552	1349	2126	2503	2296	1644	2312	1587	1750	1231	2513	1998	1493
cag	FBgn0017414	186	187	203	220	193	173	234	179	182	252	250	242	210	329	241	241	216	264	205	272	271	278	175	285	212	247	159	291	221	203
ari-1	FBgn0017418	3347	3309	3158	3199	3810	3654	4120	3718	3094	4368	4351	4030	2496	4953	3167	4161	3375	4543	2863	4609	4433	4619	3608	4796	3213	3477	2141	4396	3737	3211
CR11538	FBgn0017424	0	0	0	0	0	0	1	0	0	0	0	0	0	0	0	0	0	0	0	0	0	0	0	0	0	0	0	0	0	0
CG5989	FBgn0017429	789	791	758	785	810	720	975	717	741	1004	1050	966	912	1085	698	951	810	1068	738	1036	1066	1094	813	1072	769	807	470	1107	901	638
Nelf-E	FBgn0017430	318	328	312	319	322	321	389	331	269	408	397	385	326	510	329	399	352	432	307	475	413	431	355	511	324	333	291	450	392	279
CG2187	FBgn0017448	0	1	0	0	0	0	0	0	1	0	10	0	0	0	0	1	0	0	0	0	0	1	0	6	0	0	8	4	2	0
Ubc84D	FBgn0017456	23	18	14	10	23	19	12	6	20	19	20	17	5	9	9	9	15	23	16	12	21	13	33	24	19	16	12	17	24	24
U2af38	FBgn0017457	575	527	572	558	680	609	723	597	551	745	773	731	539	848	551	701	626	769	533	863	852	814	573	779	567	629	377	833	612	463
T3dh	FBgn0017482	542	491	501	525	555	458	606	263	580	687	709	594	425	427	561	381	366	378	562	392	746	491	548	459	526	590	413	551	622	438
RpS3A	FBgn0017545	44711	45683	54909	51593	52577	46822	48681	38750	48149	58662	65486	61248	59661	57307	52083	56585	53660	66015	48791	56258	66677	56969	51894	59193	58472	65927	32891	70631	55624	44307
Rga	FBgn0017550	1467	1481	1389	1612	1637	1542	1864	1609	1281	1872	1942	1820	1376	2103	1355	1801	1517	1980	1210	1988	2034	2117	1520	2085	1444	1521	1026	1969	1788	1363
Rca1	FBgn0017551	168	213	181	208	231	203	245	229	177	262	341	270	226	347	199	254	225	309	213	336	268	314	244	310	209	237	146	328	289	221
Prosalpha4T2	FBgn0017556	4	2	8	4	1	3	1	2	4	3	3	4	6	6	8	1	5	2	1	3	7	7	2	4	4	7	1	2	3	8
Pdk	FBgn0017558	5654	5091	5707	5453	6683	5819	6890	5217	5659	7026	8002	7193	5246	7631	6109	6289	6093	7301	5832	7663	8537	7512	6313	7010	6655	6816	4100	8284	7158	5138
Ork1	FBgn0017561	3104	2088	1656	1620	1988	1786	2422	1443	2482	2446	2708	2693	1125	1617	1587	1506	1300	1711	1534	1859	2982	2035	2289	2271	1632	1835	1497	2128	1934	1460
ND-75	FBgn0017566	13429	13938	13053	14535	14309	14085	17913	15071	13327	18205	17645	17830	12898	20209	11457	16758	12576	19589	9476	19114	17993	19448	12672	18751	11190	13607	10136	17704	15557	11548
ND-23	FBgn0017567	3598	3934	3783	4064	4244	3624	5169	4374	3737	5181	4938	4973	3581	5658	3419	5390	3583	6140	3169	5865	5316	5557	3815	5567	3488	3789	2967	5377	4185	3722
Mo25	FBgn0017572	2546	2561	2434	2639	2942	2630	3303	2641	2495	3374	3535	3299	2071	3603	2473	3072	2683	3452	2232	3500	3661	3560	2669	3495	2429	2670	1815	3386	3021	2362
Mcm5	FBgn0017577	94	108	84	89	71	69	76	66	106	157	155	112	37	112	48	109	61	98	53	107	97	162	67	104	41	67	59	69	114	96
Max	FBgn0017578	508	532	548	638	600	585	641	556	530	650	719	626	495	809	566	695	636	900	529	773	764	864	578	824	591	597	366	872	676	528
RpL14	FBgn0017579	23397	21895	25739	25775	25379	24038	26625	20570	23249	28392	36103	32915	26722	27113	22574	26558	23742	32399	21587	29916	31899	28970	28239	29712	28126	30530	17851	36132	29079	19493
Lk6	FBgn0017581	33712	32885	39467	38579	43379	41820	44270	37735	36411	45972	52126	47762	37234	52810	41697	48632	47455	60769	33909	53020	60454	59970	48002	55595	46248	49983	27258	70262	43307	34425
klg	FBgn0017590	2005	2008	1840	1904	2249	2274	2386	2598	1790	2564	2544	2454	1248	3075	1733	2660	1750	2512	1496	2937	2605	2820	2228	3266	2033	1913	1570	2364	2665	2235
COX5A	FBgn0019624	12584	12390	11814	13325	13176	12163	15620	12209	11427	16400	14979	15719	10660	18519	9495	16275	10133	19144	9300	19285	15055	16942	11023	16505	9560	11410	8276	15929	12030	9852
Atu	FBgn0019637	0	0	0	0	0	0	0	0	0	0	0	0	0	0	0	0	0	0	0	0	0	0	0	0	0	0	0	0	0	0
Dat	FBgn0019643	3598	3888	3095	3795	4034	3545	4294	3367	3139	4638	3477	4101	2480	5556	2305	3686	2615	4111	2651	4538	4277	4750	3062	4717	2671	3701	2456	4022	3698	3158
ATPsynB	FBgn0019644	11002	10611	11034	11636	12378	11955	15344	12124	10068	13777	12986	13953	10343	17132	9263	14398	9057	16560	8874	14517	13334	14687	10327	16689	10050	12234	8641	14313	10543	8793
toy	FBgn0019650	1878	1987	1799	1892	2352	2292	2427	2600	1982	2482	2758	2543	1701	3150	2113	2571	2284	2884	1785	2714	2868	2788	2389	3089	2309	2171	1652	2922	2619	2421
roX2	FBgn0019660	29	18	14	7	9	8	17	9	10	18	11	14	3	19	11	11	2	21	9	11	30	14	11	13	7	11	15	10	11	12
roX1	FBgn0019661	51	52	86	82	82	102	82	93	60	101	93	92	83	125	125	103	121	128	80	83	128	125	135	140	142	138	98	147	122	91
qm	FBgn0019662	2249	2281	1830	2064	2261	2127	2817	2577	1838	2647	2591	2605	1701	3333	2078	2855	2169	2742	1790	3141	3019	3224	2394	3364	2188	2231	1459	2842	2670	2216
lok	FBgn0019686	133	144	164	142	190	159	155	141	132	209	274	158	160	231	168	182	208	207	146	182	214	210	178	230	165	195	102	275	250	123
gcm2	FBgn0019809	4	11	10	6	10	11	9	16	11	13	10	8	8	12	5	12	8	10	5	15	12	16	4	16	7	9	9	9	14	4
dj	FBgn0019828	0	0	0	0	1	0	0	0	1	0	0	0	0	0	0	0	0	0	0	0	0	0	0	0	0	1	0	0	1	0
colt	FBgn0019830	4741	4555	5100	4699	4620	4041	5134	2857	4847	6069	5742	5597	7308	5104	4513	4087	3827	4735	5294	5192	7219	4486	4722	4483	4232	5043	3507	4767	4527	3194
Letm1	FBgn0019886	4270	4316	4083	4296	4900	4663	5245	4581	4093	5119	6039	4992	3090	5756	3729	4888	4371	5879	3385	5528	5858	5472	4537	5568	4203	4386	3166	6268	5112	4208
Smg5	FBgn0019890	4761	4486	4456	4733	5361	5328	5965	5596	4324	6001	6008	5644	4017	6850	4577	6014	5487	6950	3981	6588	6884	6918	5174	7070	4852	5312	3425	6919	5870	4796
Surf4	FBgn0019925	3956	4314	3768	4327	4504	3890	4512	3022	3777	5139	5084	5159	3034	5240	3154	3959	3215	4595	3368	4365	5199	4795	3890	4808	3314	3874	2774	4308	3819	3562
Ser8	FBgn0019928	2	5	2	0	1	0	0	2	1	1	1	3	1	2	0	3	1	2	0	2	3	1	2	1	0	1	1	3	3	2
Ser7	FBgn0019929	2462	2584	2382	2690	2823	2524	2889	1927	2532	2965	3515	3265	2336	2887	2022	2230	2199	2909	1956	2433	3087	2613	2377	2714	1934	2372	2326	3488	2520	1881
SamDC	FBgn0019932	1599	1661	1525	1504	1636	1448	1458	1030	1400	1605	1741	1539	1079	1588	1192	1256	1032	1355	1304	1286	2079	1572	1624	1594	1666	1603	1091	1756	1723	1461
RpS20	FBgn0019936	15373	15349	17583	18982	19378	18004	17211	13633	17517	20704	23236	21662	16419	19027	13950	19635	15791	22982	14034	20777	24857	23484	19798	22002	19330	21750	13134	27068	19651	12683
RpI1	FBgn0019938	731	737	746	683	808	819	903	762	786	1090	914	931	535	1003	744	896	832	1097	790	1177	1264	1388	980	1124	908	1062	496	1018	853	700
Rh6	FBgn0019940	9743	9649	11462	12413	12649	12658	11906	10050	9663	12734	13923	13208	13740	13893	9796	13337	11461	13507	7558	13137	16257	15622	11141	15596	12288	14006	9015	20933	13986	8810
Psn	FBgn0019947	1152	1215	1132	1078	1142	1184	1379	1098	1006	1401	1372	1427	1136	1619	1121	1379	1238	1666	975	1454	1557	1458	1115	1525	1114	1207	806	1532	1356	1088
Cdk9	FBgn0019949	371	419	370	388	460	413	492	420	394	566	540	561	380	585	357	516	407	588	368	580	564	521	391	548	358	442	310	527	485	358
Orct	FBgn0019952	2243	2243	1853	2044	2137	2101	2291	1718	1843	2198	2579	2632	2191	2088	2134	2269	2448	2430	2063	2515	3275	2409	2248	2473	1821	2226	1409	3078	2303	1778
ND-42	FBgn0019957	5649	6117	5950	6182	6064	5641	7645	6708	5757	8444	7518	7605	6319	9718	4785	8128	5311	9389	4385	8603	7439	8671	5306	8478	5040	6001	4668	7694	6584	5621
Mitofilin	FBgn0019960	5729	6218	5926	6323	6977	6487	8323	7229	6224	8545	8155	8064	5706	9595	5832	8362	5902	9270	4984	8761	8441	8970	6468	9282	5851	6734	4614	8644	6510	6007
Khc-73	FBgn0019968	5958	5961	5585	5744	6946	7205	7602	7691	5745	8024	7656	6752	4248	8061	5581	7004	6072	7597	4630	7842	8167	8307	6750	8940	5856	5790	4711	7613	6854	5975
Drice	FBgn0019972	512	512	509	539	588	500	588	503	456	580	646	641	564	899	507	672	573	806	418	815	695	847	515	723	571	620	372	803	700	516
Gs1l	FBgn0019982	1616	1795	1416	1615	1559	1485	1948	1716	1829	2447	1972	2049	1495	2321	1194	1941	1385	2173	1145	2256	1993	2155	1556	2442	1428	1669	1176	2190	1883	1379
mGluR	FBgn0019985	1136	1147	1140	1185	1566	1663	1712	2087	1191	1793	1739	1584	903	1958	1386	1828	1240	1812	1239	1886	1679	1725	1559	2050	1501	1265	1227	1639	1772	1775
Gcn2	FBgn0019990	1076	964	973	1050	1290	1121	1248	1052	1032	1386	1475	1360	930	1517	987	1249	1154	1476	869	1360	1478	1523	1218	1527	1189	1377	807	1598	1319	1010
Ppox	FBgn0020018	336	358	352	390	358	354	396	311	355	523	476	500	437	500	334	425	423	570	300	481	476	475	375	500	290	384	303	546	403	336
Cbl	FBgn0020224	1597	1657	1534	1646	1920	1989	2151	2145	1622	2307	2357	2133	1249	2443	1566	2153	1781	2491	1499	2483	2464	2557	1925	2642	1721	1788	1337	2472	2077	1756
ATPsyngamma	FBgn0020235	13573	14718	12567	14048	13724	12762	16608	13619	12781	17956	17092	17612	12909	20540	10999	17398	11252	21205	9658	19307	16408	18524	11408	17973	11636	13591	9481	16457	15413	12355
ATPCL	FBgn0020236	13422	14351	11712	12800	16481	15605	15044	15166	13016	15974	18907	15239	9401	18432	8728	15065	10333	16163	8290	16583	14421	18303	10934	17748	13359	12495	8818	13408	14460	11189
14-3-3epsilon	FBgn0020238	19582	20630	18093	20064	22824	20880	22567	20359	18878	25584	26420	25460	14320	28944	18098	24176	18866	25603	18087	27178	26315	26617	20203	28039	19011	20261	14040	26150	22469	20071
stet	FBgn0020248	39	45	40	48	58	49	55	66	53	74	69	58	52	53	60	82	61	78	52	75	63	69	59	64	48	57	43	90	53	51
stck	FBgn0020249	1993	2054	2023	2153	2278	2074	2386	2064	1876	2560	2869	2584	2023	2812	1837	2416	2187	3082	1753	2867	2830	2607	2221	2825	2026	2256	1627	3188	2573	1772
sfl	FBgn0020251	2179	2325	2125	2355	2674	2638	2344	2192	2012	2656	2832	2452	1542	2737	1917	2546	2048	2871	1619	2438	3031	2912	2099	2756	2171	2284	1790	2837	2517	2395
Ran	FBgn0020255	4072	4466	3964	4391	4499	3919	4786	3758	4020	5352	5236	5314	3514	5936	3754	5084	3536	5260	3986	5544	5823	5882	4298	5603	3850	4314	2735	5146	4179	3922
Ppa	FBgn0020257	1170	1267	1024	1211	1443	1342	1666	1435	1122	1671	1598	1522	822	1892	997	1407	1299	1863	1131	1915	1512	1600	1324	1864	1186	1299	943	1814	1464	1378
ppk	FBgn0020258	72	109	100	111	112	83	138	104	97	133	153	143	108	138	92	141	111	169	69	141	166	166	124	202	91	104	86	135	129	88
pcm	FBgn0020261	1183	1236	1146	1151	1356	1374	1450	1303	1112	1674	1633	1537	1087	1661	1063	1319	1225	1548	906	1590	1719	1719	1322	1712	1130	1357	945	1694	1445	1004
mspo	FBgn0020269	1647	1573	1358	1541	1803	1760	2184	2042	1488	2107	2010	2030	1068	2594	1407	2067	1448	1975	1347	2475	2183	2494	1569	2550	1315	1381	1080	1899	1797	1409
mre11	FBgn0020270	206	224	245	244	202	217	246	210	189	301	315	388	447	426	278	382	374	534	210	344	334	420	212	388	238	270	134	336	262	226
mst	FBgn0020272	98	98	195	190	264	212	115	96	103	139	128	136	297	410	189	208	123	156	128	208	138	136	100	131	102	138	139	219	135	119
lush	FBgn0020277	1040	1180	1223	1196	1329	1268	1434	1243	1269	1651	1598	1662	1097	1503	916	1435	1244	1887	1031	1698	1570	1603	1211	1714	1258	1295	848	2006	1345	1215
loco	FBgn0020278	1316	1337	1247	1352	1473	1335	1757	1407	1169	1572	1773	1519	1119	1893	1190	1429	1406	1873	1210	1835	1800	1650	1166	1543	1152	1356	932	1857	1482	1056
lig	FBgn0020279	6091	5673	5518	5455	6829	6643	7620	6580	5569	7821	7918	7424	3864	8211	4899	6581	5738	7336	4182	7756	8294	8050	6145	8298	5217	6317	4250	7908	7048	4828
laf	FBgn0020280	0	0	0	0	0	0	0	1	1	0	0	2	0	0	1	0	1	0	0	1	0	0	1	0	1	3	1	0	2	2
ko	FBgn0020294	1239	1286	1272	1325	1519	1395	1712	1527	1225	1739	1786	1754	970	1989	1220	1724	1403	2125	999	1974	1909	2078	1387	2049	1318	1540	1121	2135	1672	1287
stumps	FBgn0020299	2080	2242	1925	2062	2229	2167	2835	2183	1866	2602	2440	2515	1764	3234	1997	2963	2486	4017	1649	3288	3104	3395	2220	3141	2098	2405	1537	3521	2460	1979
geko	FBgn0020300	281	310	334	338	355	335	322	256	322	371	470	376	266	381	307	352	299	390	271	399	394	356	348	457	360	336	248	480	349	291
drongo	FBgn0020304	4423	4304	4413	4711	5151	5076	5525	5220	3866	5297	6364	5652	4775	6687	5077	5976	6571	7976	3875	6963	6049	6290	4924	6925	5268	5737	3266	7702	6083	4120
dbe	FBgn0020305	385	334	344	342	388	342	420	319	297	387	402	376	268	416	288	368	297	413	269	445	478	506	364	435	324	437	224	453	348	273
dom	FBgn0020306	6227	6318	5800	5829	6498	7091	7334	6608	6414	7508	7693	6863	4100	6876	5353	6993	6019	8181	4026	6282	9051	8318	7023	8541	6167	6829	4445	8395	6843	5470
dve	FBgn0020307	569	662	579	536	599	721	703	764	649	703	792	790	448	925	605	691	557	882	463	737	801	749	846	865	615	625	500	986	667	610
crol	FBgn0020309	6472	6457	5920	6219	7358	7367	8114	7590	5973	8454	9061	8427	4863	9105	6031	7867	6943	9142	5483	9268	8798	8872	7226	9577	6393	6829	5088	9298	7675	6581
CG4050	FBgn0020312	945	935	834	879	1009	986	1172	1109	866	1255	1266	1255	756	1386	870	1078	963	1211	761	1293	1244	1275	946	1319	844	870	766	1241	1108	879
Rpt6	FBgn0020369	1998	2067	1906	2086	2157	2014	2310	1960	1872	2479	2546	2466	2079	2739	1689	2231	1998	2542	1653	2376	2643	2455	1868	2599	1725	2073	1497	2545	2230	1751
TppII	FBgn0020370	2788	2918	2462	2698	3072	2866	3397	2905	2613	3719	3607	3449	1887	3847	2216	3169	2633	3421	2041	3524	3657	3864	2548	3496	2262	2799	1855	3192	3145	2562
Tim17b2	FBgn0020371	0	0	0	0	1	0	1	0	1	1	0	0	0	0	0	0	0	0	0	0	0	0	0	0	0	0	0	0	0	0
TM4SF	FBgn0020372	5302	5736	4685	5314	5760	5400	6020	7057	4459	7029	6222	6616	4455	9929	4205	8058	5291	9135	3513	8950	6246	9056	5026	9468	4720	5143	3870	7075	6260	5380
Sr-CIII	FBgn0020376	1	0	0	1	3	0	0	1	1	1	0	1	1	2	0	1	0	0	2	1	0	3	1	2	0	0	1	2	1	2
Sr-CII	FBgn0020377	1	2	2	2	3	0	1	4	0	1	3	3	3	5	3	1	1	2	1	2	3	6	0	4	2	2	2	0	2	1
Sp1	FBgn0020378	626	590	578	676	798	801	792	878	674	909	785	878	542	1002	598	888	760	1086	499	1040	929	1033	691	1095	641	772	459	1122	756	581
Rfx	FBgn0020379	767	785	749	794	868	874	1066	1022	773	1134	1069	1017	740	1232	733	1037	875	1145	631	1148	1212	1249	828	1189	735	882	593	1145	1015	768
Dredd	FBgn0020381	633	576	657	665	665	602	695	620	438	629	685	660	574	806	549	630	633	840	592	818	843	807	476	618	561	719	471	929	736	598
pug	FBgn0020385	10470	10458	10311	10424	9216	8773	7849	4923	9293	10279	12117	9759	10121	7682	9085	5453	8351	7175	6236	5177	11680	6788	7589	6539	9119	11443	7477	7141	9603	6765
Pdk1	FBgn0020386	4921	5251	5315	5314	5833	5985	6133	6286	6650	8145	6420	6152	4612	7911	5536	6801	6055	8702	4379	7263	8416	8629	6161	8613	5563	5861	3847	8262	6066	5695
Gcn5	FBgn0020388	1042	1083	1077	1060	1383	1156	1374	1223	1127	1581	1573	1498	1123	1746	1116	1382	1363	1641	1000	1762	1581	1684	1235	1660	1134	1297	797	1745	1473	999
Papss	FBgn0020389	2225	2374	2215	2249	2227	1966	2404	1587	2442	3127	3067	3311	1463	2694	1355	1959	1544	2191	1757	2415	3002	2667	2060	2476	1745	2049	1755	2422	2510	1674
Nrk	FBgn0020391	254	225	158	197	243	226	254	246	207	276	283	268	170	312	214	284	197	263	216	355	265	303	234	282	219	202	176	281	256	191
Nmt	FBgn0020392	741	826	612	818	786	667	760	585	671	942	915	852	428	830	566	768	574	818	543	770	856	908	643	902	537	713	507	769	762	605
Mst89B	FBgn0020399	0	1	1	0	4	2	0	1	2	2	1	3	0	4	4	2	1	5	1	1	4	3	1	3	2	2	0	2	2	1
asun	FBgn0020407	207	201	182	186	237	232	237	222	198	265	278	298	159	369	193	263	227	271	233	295	272	323	204	296	202	208	149	268	268	170
JIL-1	FBgn0020412	1745	1858	1729	1809	2079	2042	2092	1921	1650	2185	2424	2208	1366	2297	1629	2022	1873	2323	1430	2094	2440	2270	1932	2490	1890	1914	1511	2481	2192	1783
Idgf3	FBgn0020414	4750	5124	5117	5167	5841	5136	5207	4123	4388	5652	6712	5706	5278	6114	5004	4953	5004	5883	4539	5233	7093	5459	4990	5778	5431	5665	3766	7095	6125	4807
Idgf2	FBgn0020415	7204	7543	8127	7867	8852	7837	8155	6196	7471	9231	11297	9717	8980	9731	7606	7698	8767	10815	7018	8224	11974	10067	8439	8931	9175	9747	5939	12182	9341	7376
Idgf1	FBgn0020416	3030	2900	3511	3330	4304	3435	3396	2773	2981	3143	4693	3695	3232	3984	3729	3310	3391	3926	3177	3919	5137	4295	3676	3808	4018	3949	2358	5328	3922	2696
GluRIIB	FBgn0020429	4	2	3	4	2	0	3	2	2	3	2	3	3	2	2	0	9	2	1	6	6	10	1	7	5	6	1	6	0	2
Fak	FBgn0020440	1880	1694	1649	1721	2143	1970	2366	2217	1634	2311	2421	2328	1333	2685	1797	2217	1991	2600	1744	2588	2573	2625	1930	2562	1815	1983	1375	2432	2068	1925
Elf	FBgn0020443	3577	3690	3120	3588	3895	3533	4124	3142	3495	4621	4369	4558	2220	4284	2972	3574	2968	4020	3071	4255	4854	4713	3681	4249	3375	3608	2437	3839	3345	3212
E23	FBgn0020445	498	489	471	429	549	490	617	494	418	545	599	533	378	694	435	541	486	625	405	610	659	608	471	536	512	472	315	722	553	430
Dad	FBgn0020493	1823	1755	1813	1841	2189	2062	2318	2096	1858	2396	2310	2092	1494	2744	1987	2429	2020	2879	1537	2487	2796	2557	2092	2581	2110	2132	1486	2647	2050	1617
CtBP	FBgn0020496	5711	5658	5787	6155	7279	6840	7649	6646	5801	7800	8343	7680	5148	8855	6410	7398	6693	8528	5778	8416	8636	8284	6730	8680	6566	7003	4460	8555	7244	6080
emb	FBgn0020497	3446	3243	3052	3084	3688	3526	3843	3311	3067	4053	4323	3905	2420	4233	3005	3615	3452	4090	2867	4228	4649	4435	3625	4468	3364	3639	2281	4398	3934	3126
CLIP-190	FBgn0020503	9992	10786	10871	11667	13354	13162	12559	11360	10335	14072	14162	13491	9781	15864	11538	14984	11549	16641	9621	15190	14932	15461	11316	15751	11108	12657	7951	16123	12719	10659
Amyrel	FBgn0020506	1	2	2	3	0	2	0	2	1	3	2	4	0	1	4	0	2	4	1	2	1	1	1	2	1	2	2	3	8	1
Ag5r2	FBgn0020508	1	4	0	2	1	2	0	0	4	0	1	1	1	0	4	0	1	2	3	4	2	1	1	2	0	2	1	1	1	0
Acp62F	FBgn0020509	1	0	0	0	2	2	0	0	0	0	0	0	0	0	0	0	0	0	0	4	0	0	0	0	0	1	0	0	1	1
Abi	FBgn0020510	1193	1294	1058	1188	1307	1347	1521	1252	1102	1434	1551	1478	964	1731	1074	1454	1196	1776	1069	1730	1712	1683	1241	1645	1073	1278	866	1804	1497	1119
ade5	FBgn0020513	10225	9680	10991	10943	10809	9561	7818	5380	11229	13877	16263	14335	11132	8407	8355	7288	6797	8746	8464	6915	12202	10091	8081	7230	9930	12254	7432	9289	10642	7880
snoRNA:Me28S-G764	FBgn0020518	1	2	1	2	1	5	4	2	2	1	5	4	1	6	1	0	2	5	0	2	3	2	1	0	1	1	1	1	2	3
pio	FBgn0020521	5162	5815	4748	5387	6142	5672	6477	5679	4696	6941	7183	7023	3918	8805	3836	6951	5014	8788	3708	8012	6592	7581	4815	7957	4496	5594	3984	7973	6344	5445
kraken	FBgn0020545	1791	1743	2153	2171	2106	1870	2087	1825	1680	2207	2128	1992	3720	2892	1955	2264	2453	2858	1601	2780	2720	2636	1925	2459	2123	2363	1453	3033	2170	1311
iab-4	FBgn0020546	0	0	0	0	0	0	0	0	0	0	0	0	0	0	0	0	0	0	0	0	0	0	0	0	0	0	0	0	0	0
bxd	FBgn0020556	0	0	0	0	0	0	0	0	0	0	0	0	0	0	0	0	0	0	0	0	0	0	0	0	0	0	0	0	0	0
SA	FBgn0020616	1016	1050	996	1019	1203	1167	1379	1158	969	1410	1385	1303	807	1473	994	1308	1173	1452	952	1403	1615	1552	1203	1674	1108	1138	772	1505	1289	1140
Rx	FBgn0020617	116	118	112	133	155	160	164	136	114	194	167	184	130	197	140	204	132	191	105	223	161	187	132	199	120	111	85	169	173	129
Rack1	FBgn0020618	40101	37636	43405	43930	42393	40802	42165	31763	41826	49443	55794	52365	43516	44807	32884	42850	39660	53805	30169	49055	55549	51037	44748	48531	42010	50515	30671	59868	47932	29051
RN-tre	FBgn0020620	1629	1678	1510	1628	1829	1826	1886	1908	1486	1973	2182	2062	1314	2391	1622	2047	1678	2290	1438	2385	2270	2264	1764	2352	1620	1710	1190	2298	1944	1613
Pkn	FBgn0020621	10529	10414	10007	9857	11166	11113	13076	11590	9839	13435	13036	12502	9551	16592	10304	13334	12711	17025	8659	14789	15971	17313	12734	17014	11448	12674	7683	16645	11993	9705
Pi3K21B	FBgn0020622	839	965	977	1005	1157	1054	1204	1046	1116	1401	1618	1336	885	1509	1088	1236	1009	1287	947	1351	1457	1378	1261	1537	1050	1014	885	1431	1196	1093
Osbp	FBgn0020626	2527	2538	2523	2662	2824	2581	3091	2554	2316	3282	3299	3315	2443	3863	2265	2979	2436	3421	1973	3548	3640	3642	2459	3603	2341	2727	1814	3354	2881	2079
Mcm7	FBgn0020633	15	22	11	19	17	17	15	5	20	31	11	31	5	20	6	17	8	28	17	19	18	22	16	19	14	13	14	14	20	24
Lcp65Ag2	FBgn0020637	22	17	11	23	18	21	14	8	10	16	20	17	14	10	10	4	9	21	18	6	13	11	5	13	27	51	9	40	25	16
Lcp65Ag1	FBgn0020638	0	0	0	0	0	0	0	0	0	0	0	1	0	0	0	0	1	2	0	0	0	0	0	0	0	0	0	0	0	0
Lcp65Af	FBgn0020639	2	0	0	0	0	1	0	0	0	0	0	0	0	1	0	0	0	0	1	0	0	1	0	0	0	0	0	1	0	0
Lcp65Ae	FBgn0020640	0	0	0	0	0	0	2	0	2	0	0	0	0	0	0	0	0	0	1	0	0	1	1	0	1	1	0	1	2	0
Lcp65Ad	FBgn0020641	0	0	0	0	0	0	0	0	0	0	0	2	1	0	0	0	0	2	0	1	0	1	0	4	0	0	1	0	1	0
Lcp65Ac	FBgn0020642	36	35	36	64	64	84	39	28	17	32	35	35	33	54	17	33	52	62	35	42	83	86	38	46	41	42	42	96	37	32
Lcp65Ab2	FBgn0020643	0	0	0	0	0	0	0	0	0	0	0	0	0	0	0	0	0	0	0	0	0	0	0	0	0	0	0	0	0	0
Lcp65Ab1	FBgn0020644	0	0	0	0	0	0	0	0	0	0	0	0	0	0	0	0	0	0	0	0	0	0	0	0	0	0	0	0	0	0
Lcp65Aa	FBgn0020645	0	0	0	0	0	0	0	0	0	0	0	0	0	0	0	0	0	0	0	0	0	0	0	0	0	0	0	0	0	0
Lcp65APsi	FBgn0020646	0	0	0	0	0	0	0	0	0	0	0	0	0	0	0	0	0	0	0	0	0	0	0	0	0	0	0	0	0	0
KrT95D	FBgn0020647	3364	3374	3296	3527	4014	3933	4230	4065	3296	4453	4781	4287	3114	4912	3214	4042	3700	4324	2733	4972	4651	4680	3764	4992	3533	3635	2965	5063	4501	3070
Trxr-1	FBgn0020653	5603	5565	5610	5931	6422	5513	7038	5146	5156	6932	7254	6771	5518	7670	5009	5934	5093	7206	4585	7229	8212	7103	5328	7155	4745	5886	4225	7195	5813	4306
ArfGAP1	FBgn0020655	1701	1903	1788	2095	2005	1926	2282	1715	1706	2335	2436	2456	1637	2650	1444	1893	1636	2220	1561	2326	2527	2353	1851	2236	1420	1767	1281	2073	1946	1437
eIF-4B	FBgn0020660	588	660	638	629	696	673	741	620	603	748	843	811	510	799	709	746	617	933	717	791	996	811	739	876	705	690	402	863	795	663
Atet	FBgn0020762	5160	4901	4622	5167	5760	5676	6132	4916	4497	5731	6378	5726	4072	6251	4695	5343	5129	6677	4248	5865	7058	6045	4808	6197	4815	4762	3569	7181	5699	4497
Alas	FBgn0020764	2318	2295	2311	2538	2532	2430	3257	2997	2556	3827	3275	3437	2839	3926	2526	3711	2927	4240	2099	4095	3561	4308	2561	4149	2409	3142	1746	4003	2847	2281
Acp65Aa	FBgn0020765	3	5	1	6	3	1	4	6	5	9	8	5	1	38	5	17	4	20	1	13	3	7	2	4	2	3	0	1	4	3
Spred	FBgn0020767	3638	3704	3401	3555	4368	4454	4763	4955	3526	5006	4660	4665	2793	5929	3799	4929	4065	5422	3367	5512	4972	5562	4341	6091	3983	3929	2883	5070	4511	4403
CG7179	FBgn0020880	0	0	0	0	2	0	1	1	4	1	1	2	4	2	1	1	1	1	1	0	0	0	4	2	1	2	0	0	3	0
Su(z)12	FBgn0020887	1033	1134	1006	1077	1327	1205	1407	1305	1025	1516	1441	1353	965	1794	953	1350	1242	1520	823	1544	1487	1644	1157	1582	1099	1256	813	1548	1350	946
Jon25Bi	FBgn0020906	1	47	5	3	2	6	26	8	13	3	581	26	2	2	0	82	7	14	17	98	6	27	115	8	22	34	160	11	11	2
Scp2	FBgn0020907	5277	5295	5197	5198	5619	5308	7134	6205	5127	6786	7326	7259	5809	8974	5294	6920	5522	8081	5236	8188	7625	7966	6055	8563	6412	6274	4255	7780	6621	5788
Scp1	FBgn0020908	337	425	262	370	312	311	528	716	360	615	433	346	166	607	297	464	178	645	301	793	369	601	289	712	305	423	216	337	337	383
Rtc1	FBgn0020909	327	314	327	359	391	335	389	265	343	412	398	408	384	359	275	334	303	405	285	327	520	425	378	455	335	390	239	366	334	299
RpL3	FBgn0020910	49606	47811	56980	59200	55705	54651	55929	41464	50715	61427	76794	70464	58789	57262	45489	53794	53054	66354	42650	61995	73350	64084	60086	64933	52550	63331	38281	77723	59822	39063
Ptx1	FBgn0020912	122	101	76	88	95	130	127	124	93	147	163	126	70	179	115	147	118	120	80	170	150	181	111	141	103	88	83	135	128	133
Dgkepsilon	FBgn0020930	2196	2273	2246	2421	2538	2289	2667	2426	2039	2978	2741	2740	3040	3526	2103	2868	2579	3550	1863	3325	3082	3263	2203	3178	2013	2383	1461	3137	2341	1821
Crg-1	FBgn0021738	232	177	215	166	280	219	375	242	217	326	324	334	181	261	301	248	218	281	394	398	428	375	269	286	396	360	221	460	250	270
C901	FBgn0021742	16	15	9	18	19	16	12	13	14	16	17	15	9	16	9	17	11	20	18	16	24	19	15	29	13	18	16	22	15	13
SerRS-m	FBgn0021750	374	360	386	387	443	395	458	375	346	523	527	557	391	601	362	464	383	556	394	552	493	596	378	559	363	436	273	542	436	331
chb	FBgn0021760	2412	2559	2313	2368	2828	2905	2967	2822	2149	3232	3218	3011	1762	3443	2191	2949	2531	3306	1854	3143	3364	3349	2488	3688	2488	2481	1845	3467	2843	2504
Nup154	FBgn0021761	587	561	578	573	644	577	737	617	572	910	735	787	497	910	506	638	542	719	534	825	862	896	681	893	543	667	369	694	678	514
sdk	FBgn0021764	2016	2061	1634	1586	1747	2021	1953	1804	1595	1932	2015	1719	1178	2760	1590	2097	1876	3159	1316	2720	2214	1980	1651	2115	1712	1785	1308	1914	1832	1838
scu	FBgn0021765	6732	6070	6505	6700	6729	5887	7237	4180	6543	8346	7968	8124	6530	7760	5652	5865	4545	6296	5333	6369	8464	6240	5535	6017	4911	5974	4053	6631	6120	4107
org-1	FBgn0021767	3	6	3	6	4	2	5	7	3	2	4	3	2	5	3	4	5	7	2	4	4	7	5	6	6	6	3	6	10	7
nudC	FBgn0021768	497	548	512	568	608	501	689	526	554	731	625	693	490	735	522	612	542	684	591	688	803	772	576	772	583	612	311	598	547	536
mira	FBgn0021776	28	8	12	12	19	17	22	15	19	19	19	21	6	10	15	14	6	24	10	15	22	22	17	26	9	14	11	26	21	10
Tapdelta	FBgn0021795	2980	3328	2880	3284	2991	2657	2995	2077	2528	3813	3647	4046	2160	3415	1734	2456	1800	2966	2034	2770	3354	3342	2413	3085	2091	2723	2098	2724	2679	2248
Tor	FBgn0021796	1984	1887	1718	1707	1911	1988	2328	1942	1762	2445	2246	2009	1343	2435	1511	1998	1820	2390	1418	2254	2562	2547	1924	2352	1608	1869	1343	2280	1856	1635
Reph	FBgn0021800	3135	3168	2917	3195	3698	3543	3939	4092	3046	4203	4004	3925	1977	4808	3167	4364	3195	4611	2838	4781	4547	4846	3712	5229	3326	3346	2413	4375	3904	3687
Vps28	FBgn0021814	825	896	870	926	937	799	1085	925	822	1074	1170	1129	1088	1167	844	1040	987	1301	790	1296	1156	1106	940	1290	932	952	608	1387	1085	755
cnk	FBgn0021818	1224	1330	1144	1127	1389	1364	1603	1337	1145	1614	1626	1512	1076	1920	1181	1574	1303	1836	1031	1763	1800	1970	1393	1877	1196	1423	1046	1828	1517	1156
[truncated: 15,476 more rows]
